# Supplementary material for: I2-Catalyzed sulfenylation of indoles and pyrroles using triethylammonium thiolates as sulfenylating agents
Source: Royal Society of Chemistry journal article supplement (doi:10.1039/c6qo00851h), 2017-01-01
Supplement: c6qo00851h1.pdf [file c6qo00851h1.pdf]

## Supporting Information

### **I<sub>2</sub>-Catalyzed sulfenylation of indoles and pyrroles using triethylammonium thiolates as sulfenylating agents**

Wei Fan,<sup>a</sup> Zhen Yang,<sup>a</sup> Bo Jiang<sup>\*,b</sup> and Guigen Li<sup>\*,a</sup>

<sup>a</sup>*Institute of Chemistry & BioMedical Sciences, Nanjing University, Nanjing 210093, P. R. China.*

<sup>b</sup>*School of Chemistry and Chemical Engineering, Jiangsu Key Laboratory of Green Synthetic Chemistry for  
Functional Materials, Jiangsu Normal University, Xuzhou 221116, P. R. China.*

*E-mail: guigen.li@ttu.edu; jiangchem@jsnu.edu.cn*

### **Table of Contents**

|                                                                                           |         |
|-------------------------------------------------------------------------------------------|---------|
| Copies of <sup>1</sup> H and <sup>13</sup> C NMR Spectra for Compounds <b>4a-4u</b> ----- | S2-S22  |
| Copies of <sup>1</sup> H and <sup>13</sup> C NMR Spectra for Compounds <b>5a-5o</b> ----- | S23-S37 |
| Copies of <sup>1</sup> H and <sup>13</sup> C NMR Spectra for Compounds <b>7a-7l</b> ----- | S38-S49 |
| Copies of <sup>1</sup> H and <sup>13</sup> C NMR Spectra for Compounds <b>8a</b> -----    | S50     |

# Copies of $^1\text{H}$ NMR and $^{13}\text{C}$ NMR of Compounds 4a-4u

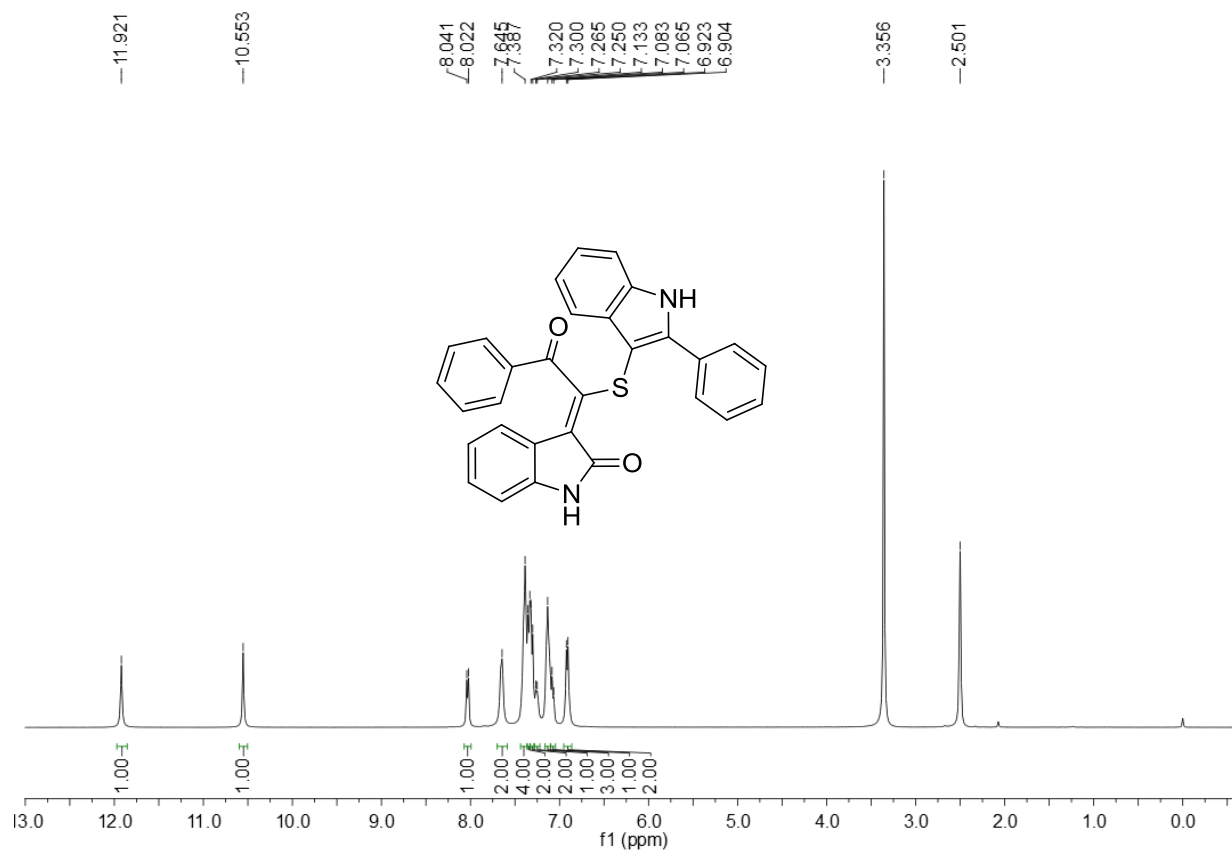

$^1\text{H}$  NMR Spectrum of Compound 4a

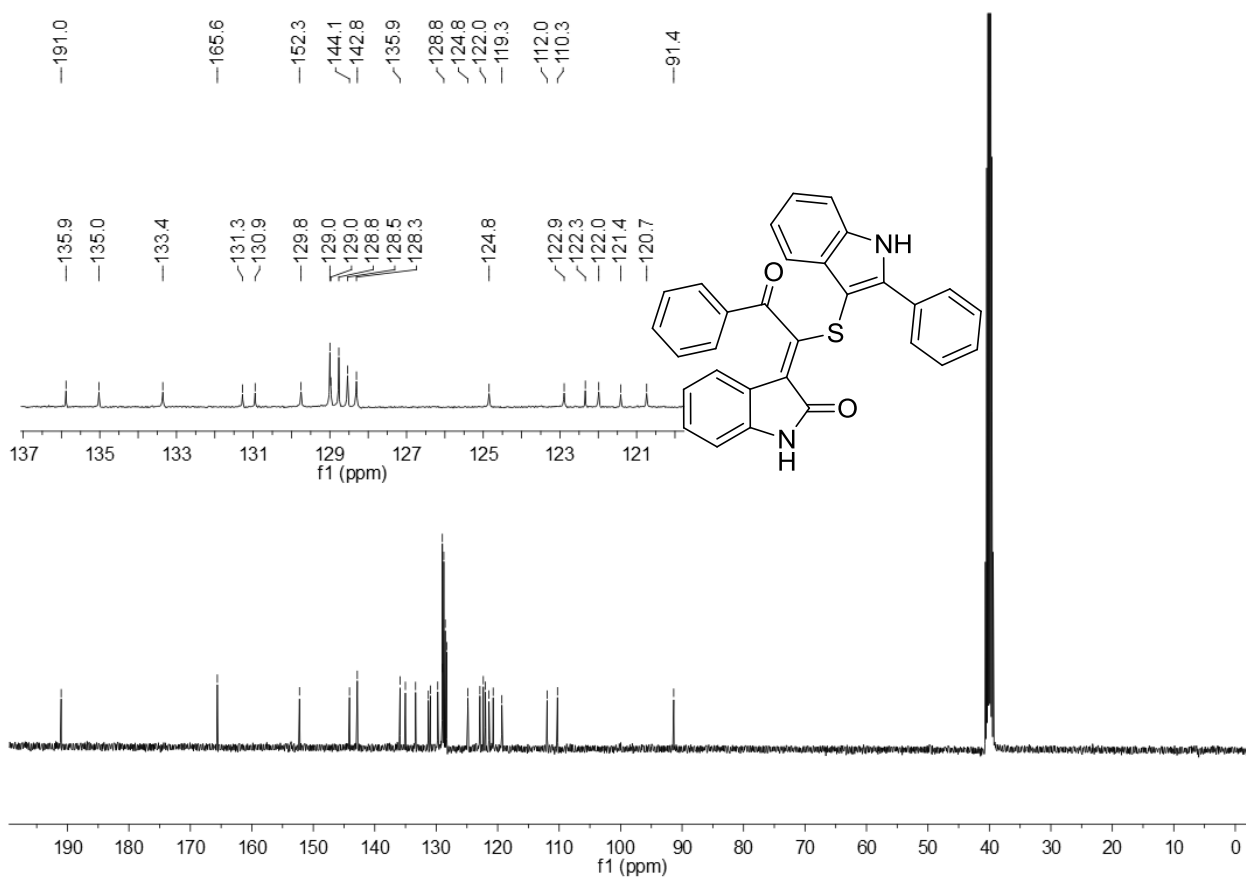

$^{13}\text{C}$  NMR Spectrum of Compound 4a

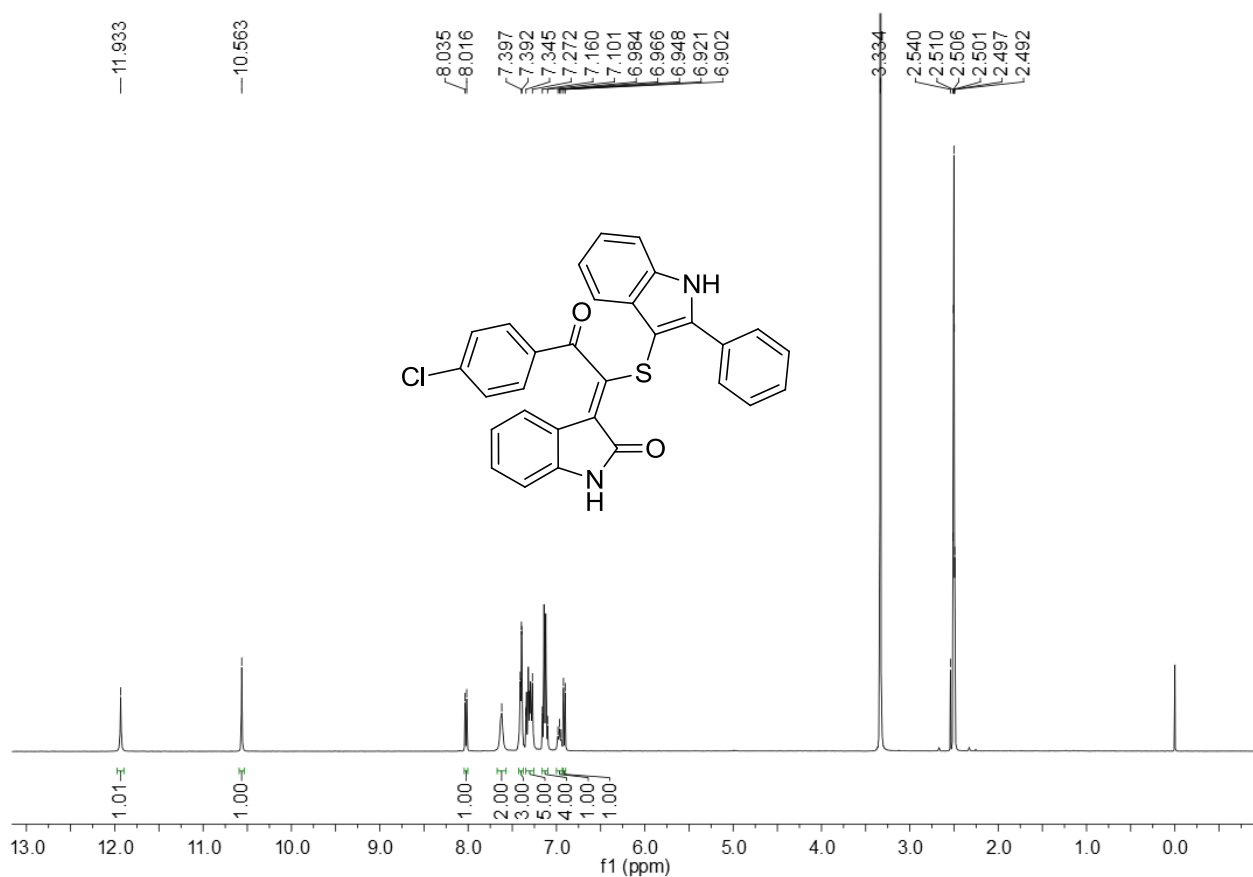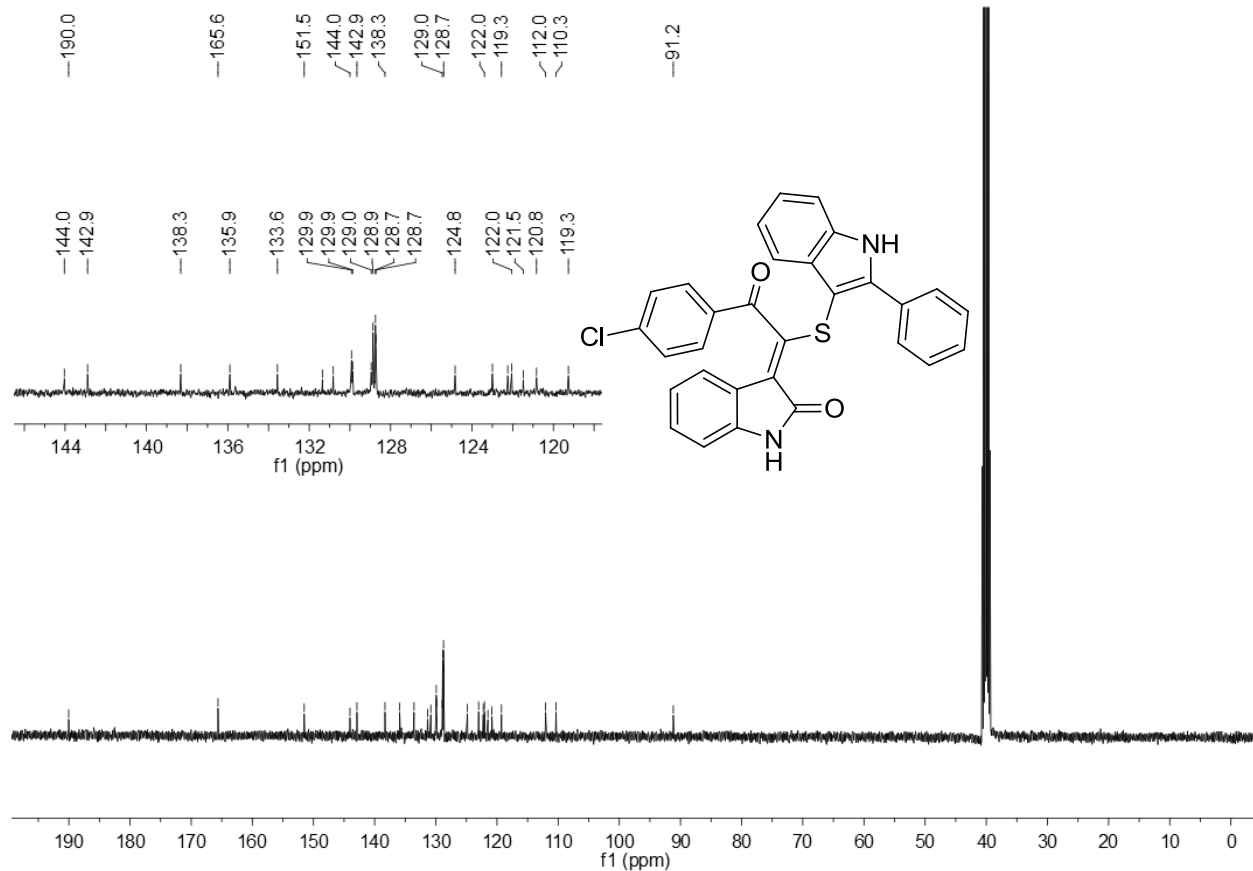

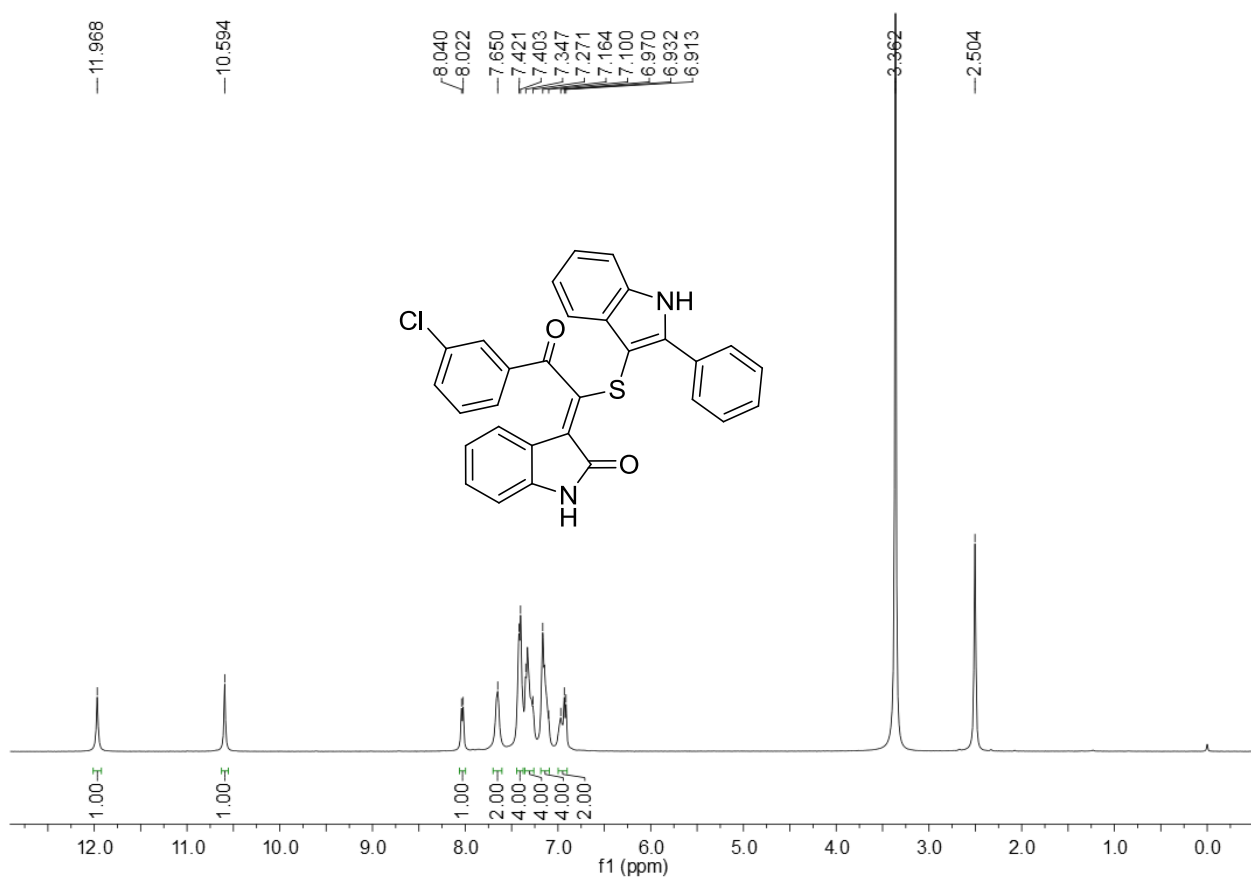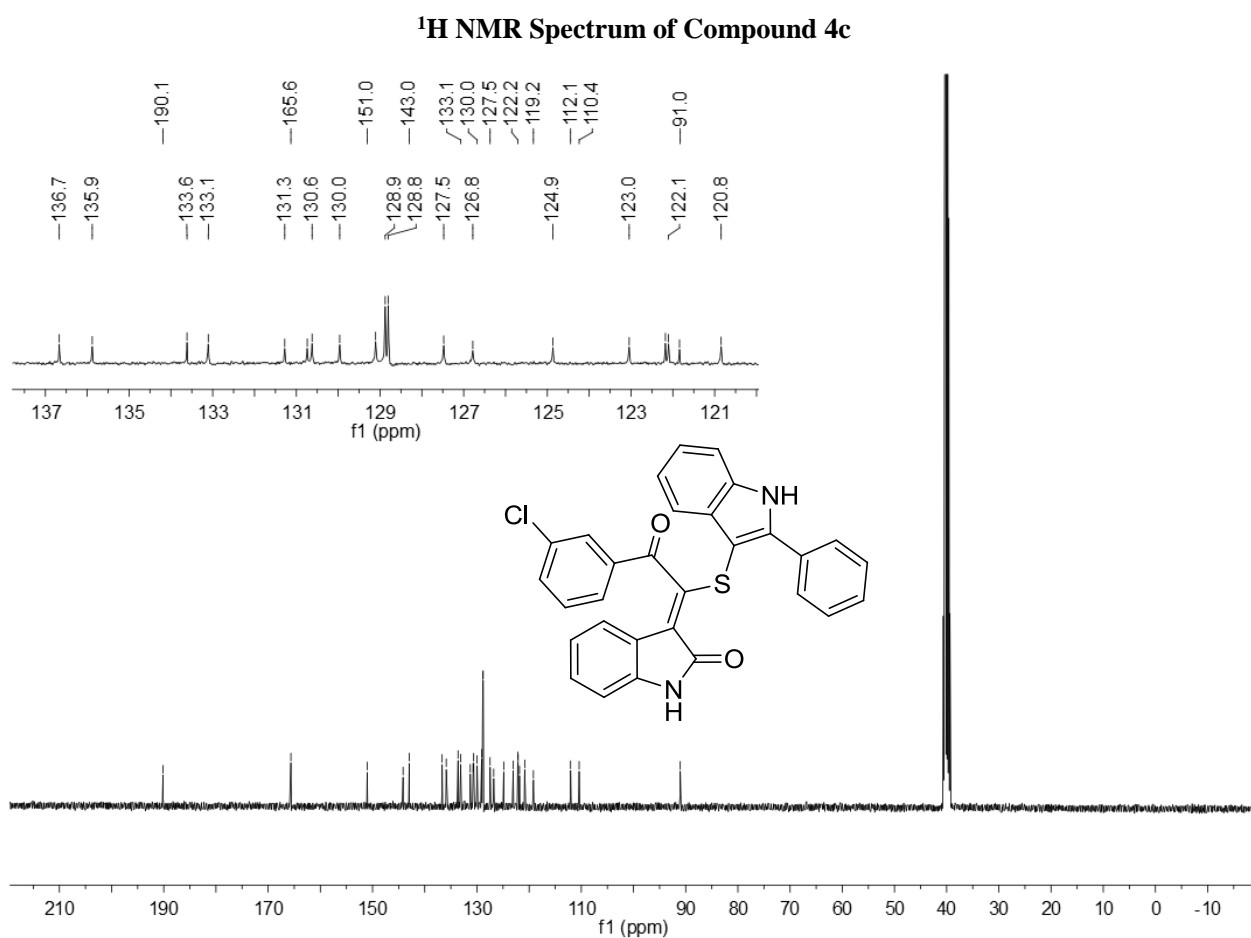

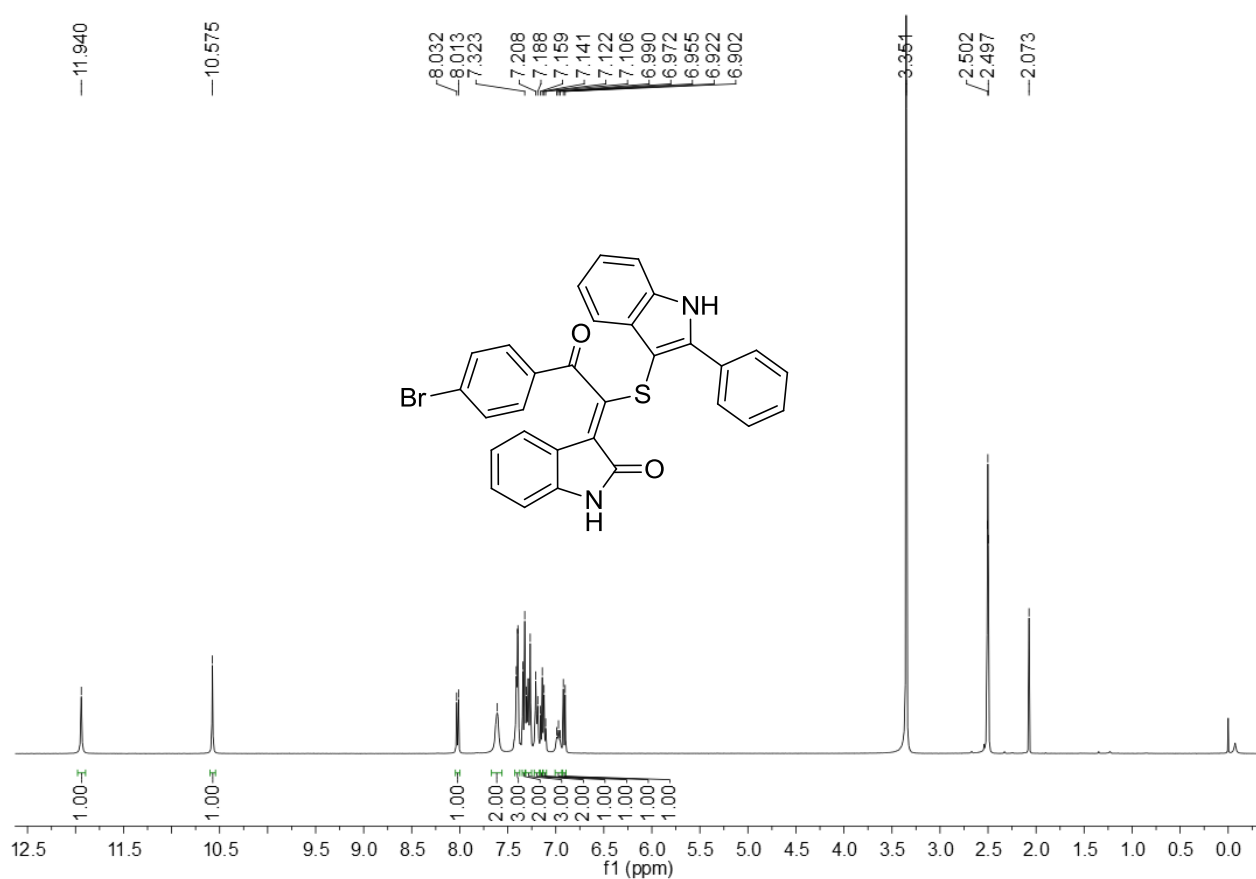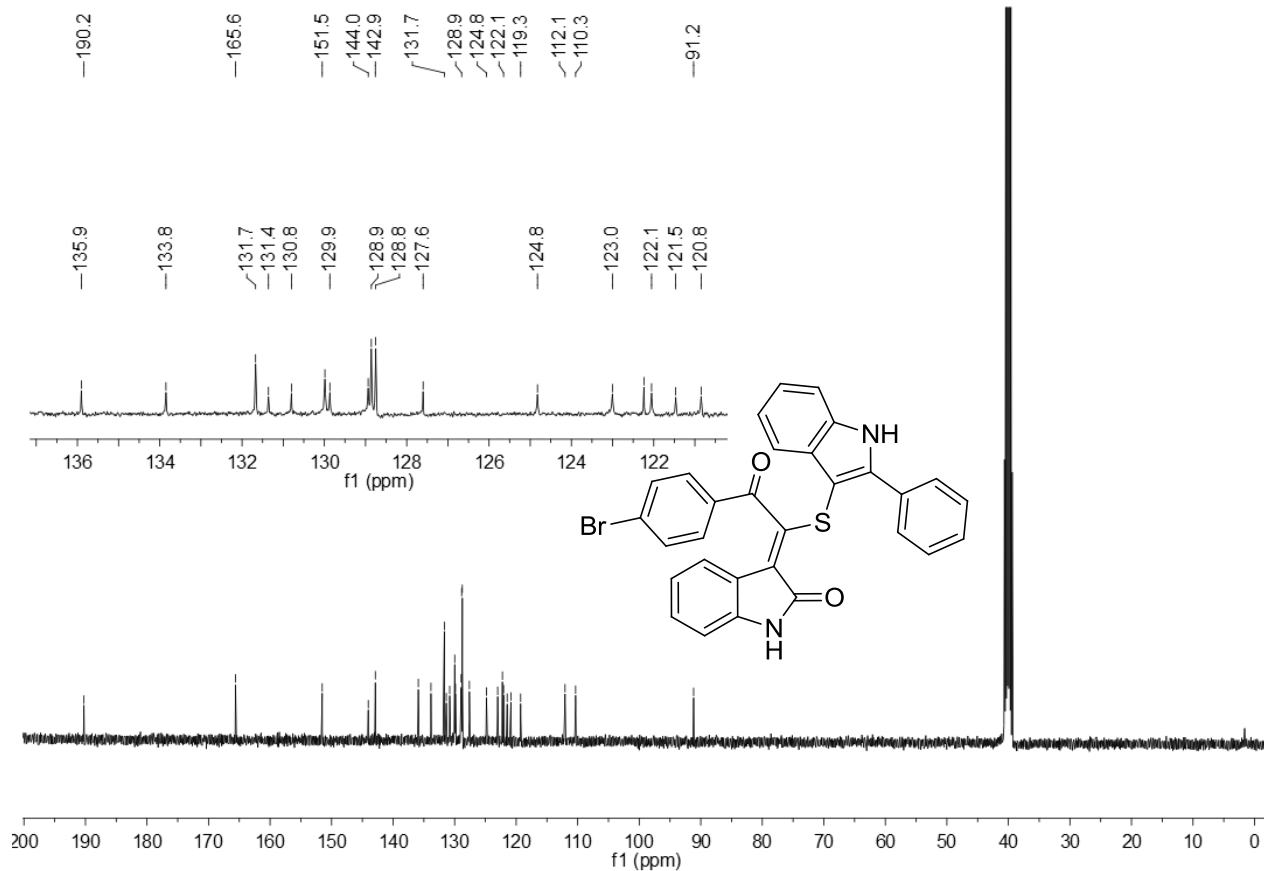

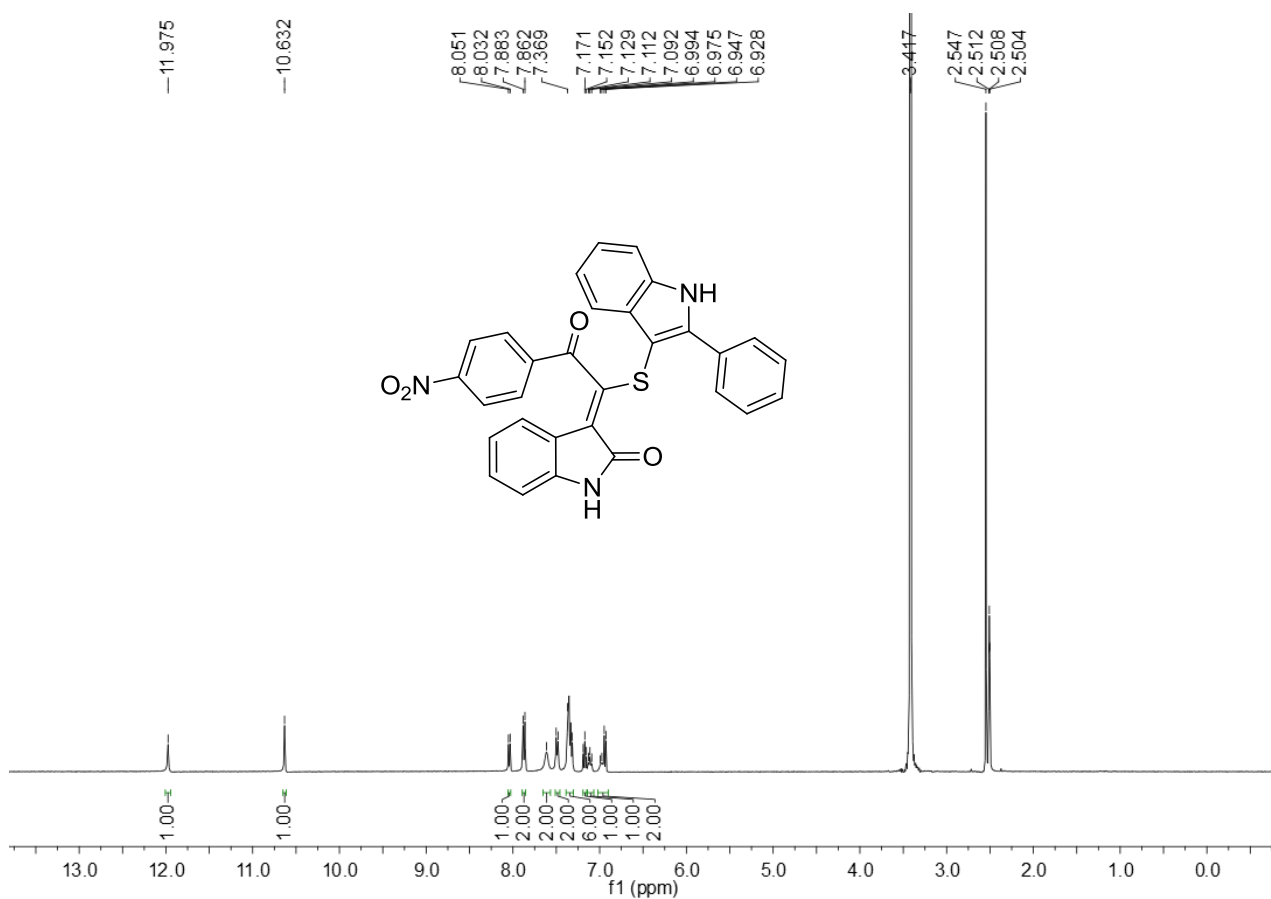

<sup>1</sup>H NMR Spectrum of Compound 4e

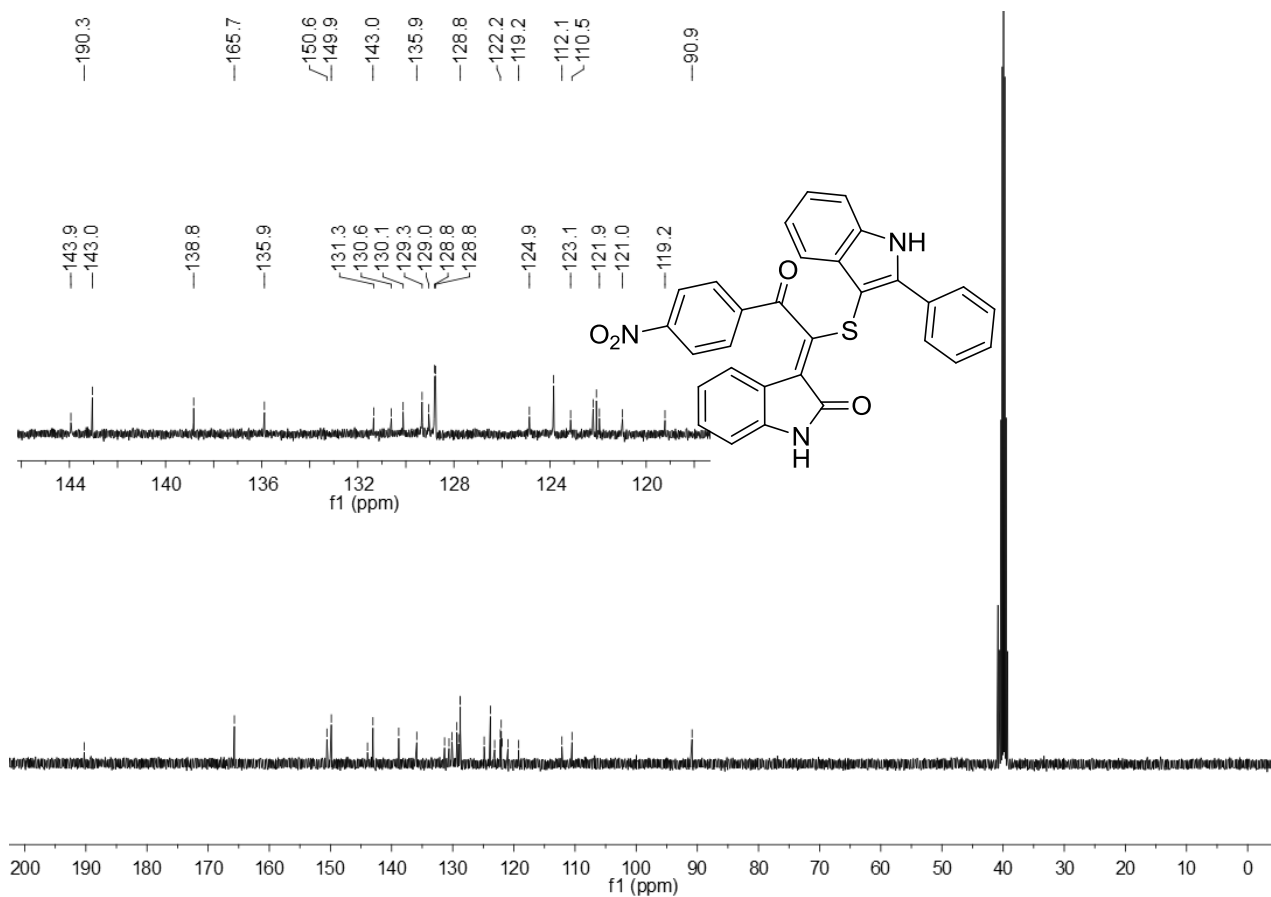

<sup>13</sup>C NMR Spectrum of Compound 4e

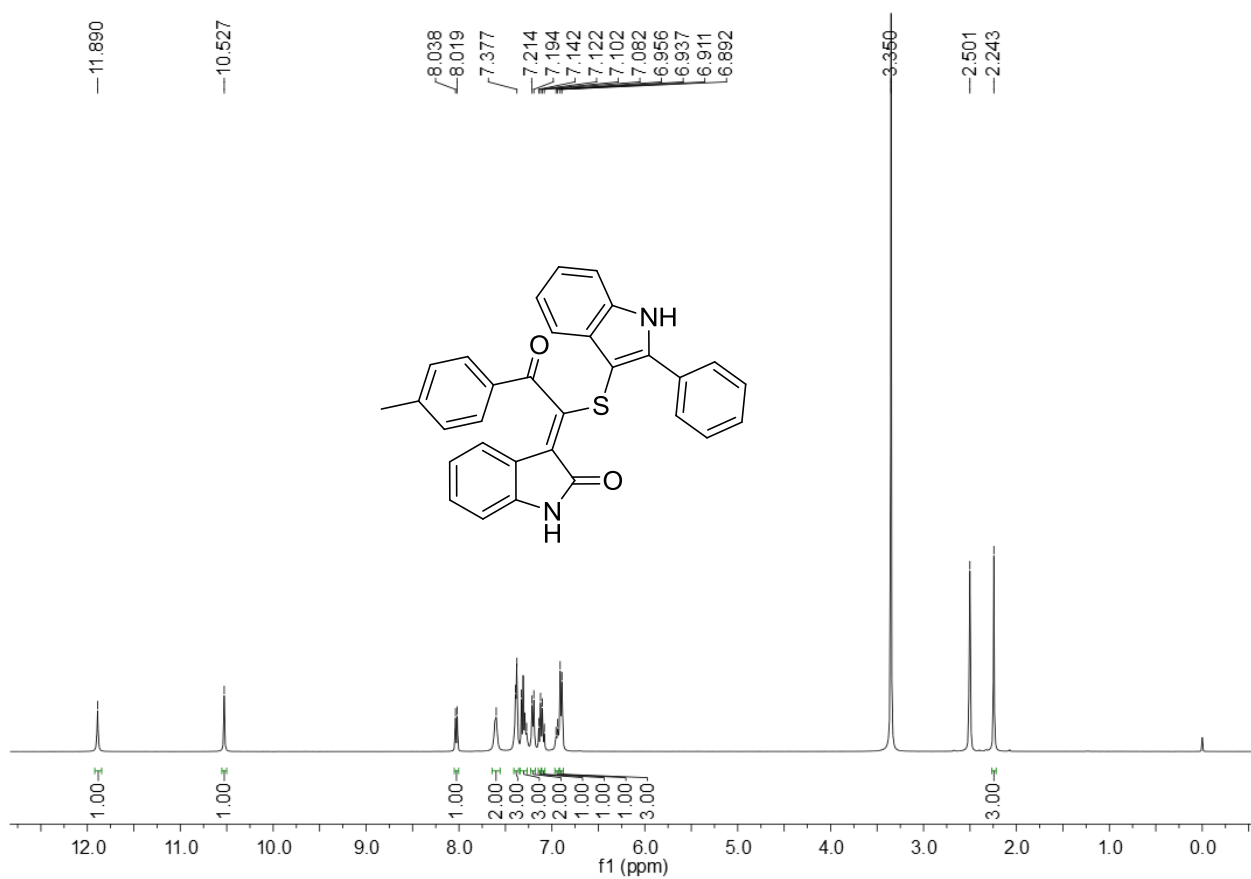

**<sup>1</sup>H NMR Spectrum of Compound 4f**

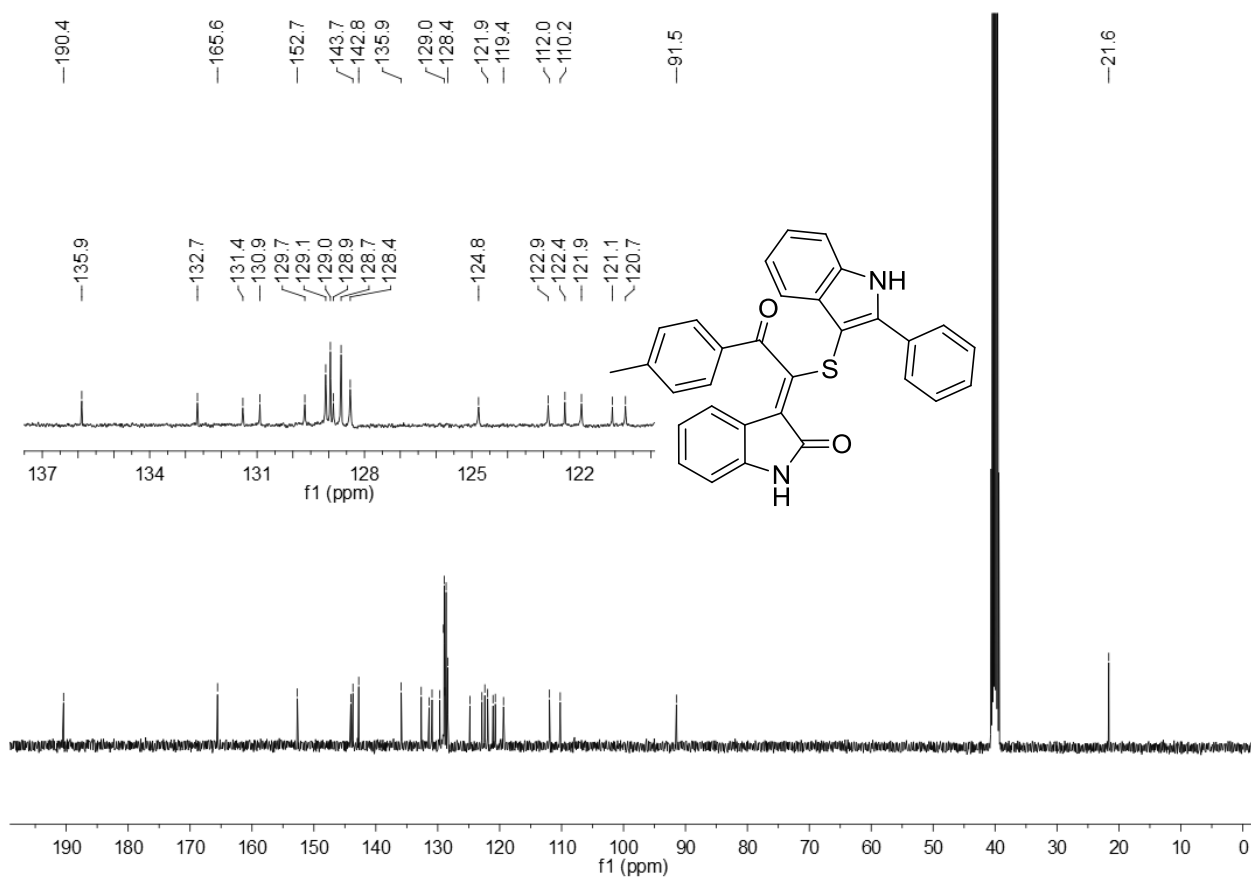

**<sup>13</sup>C NMR Spectrum of Compound 4f**

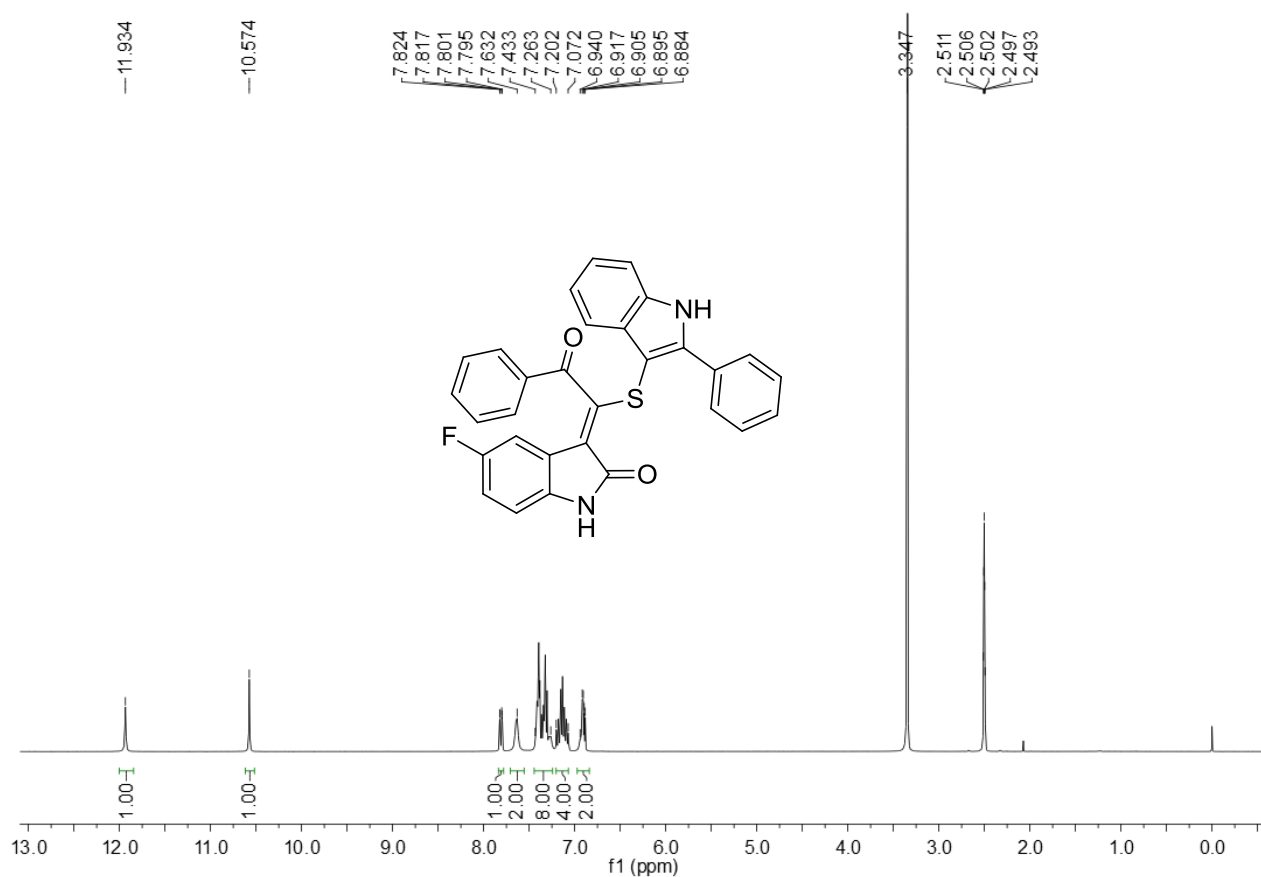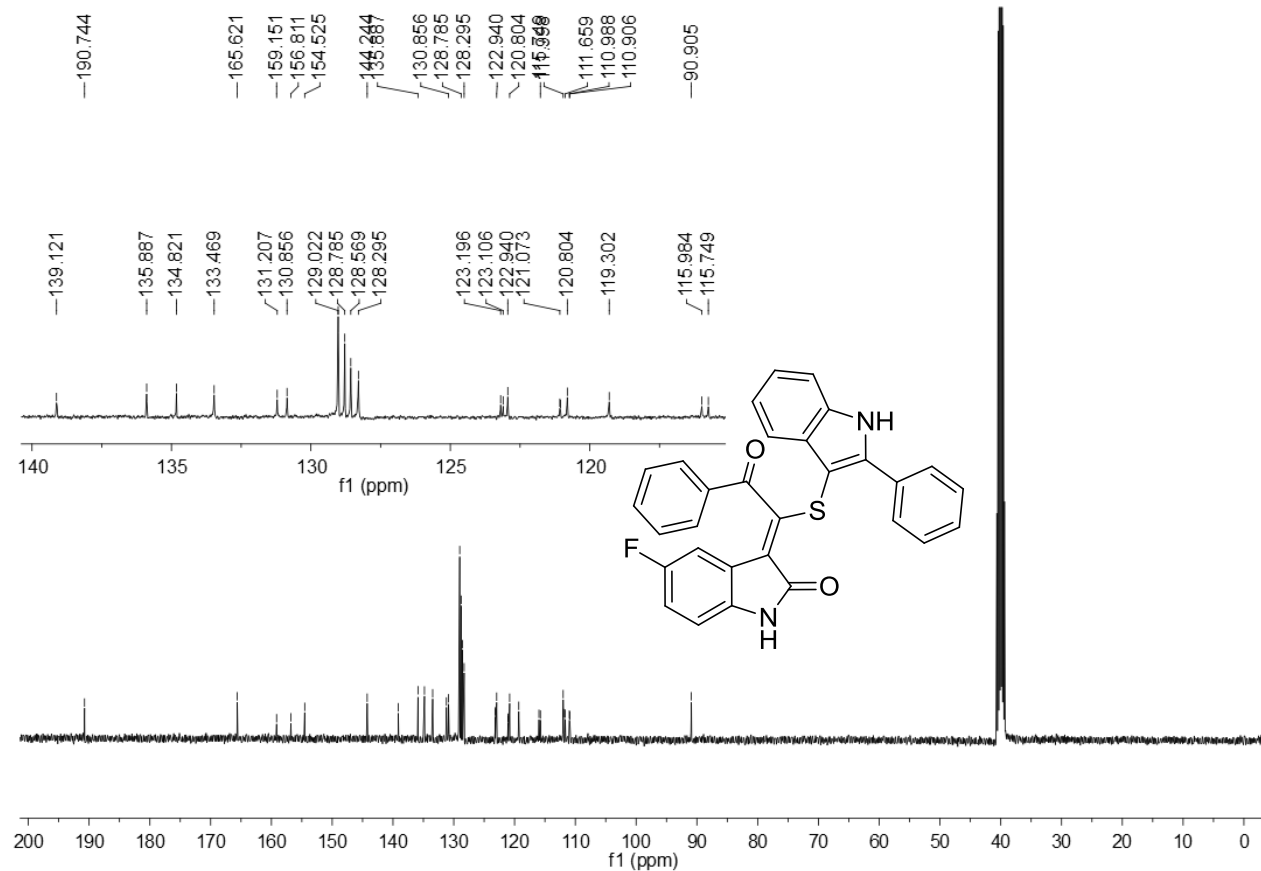



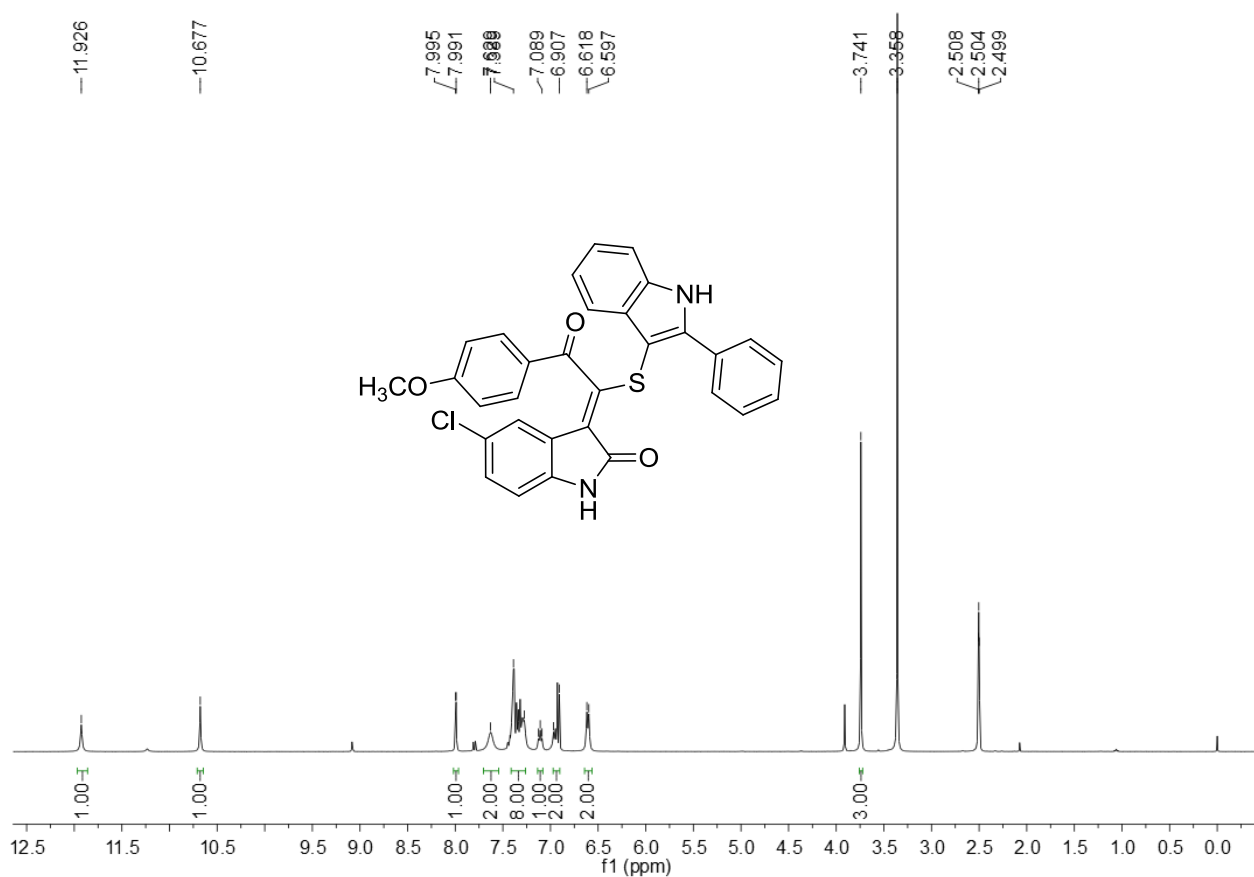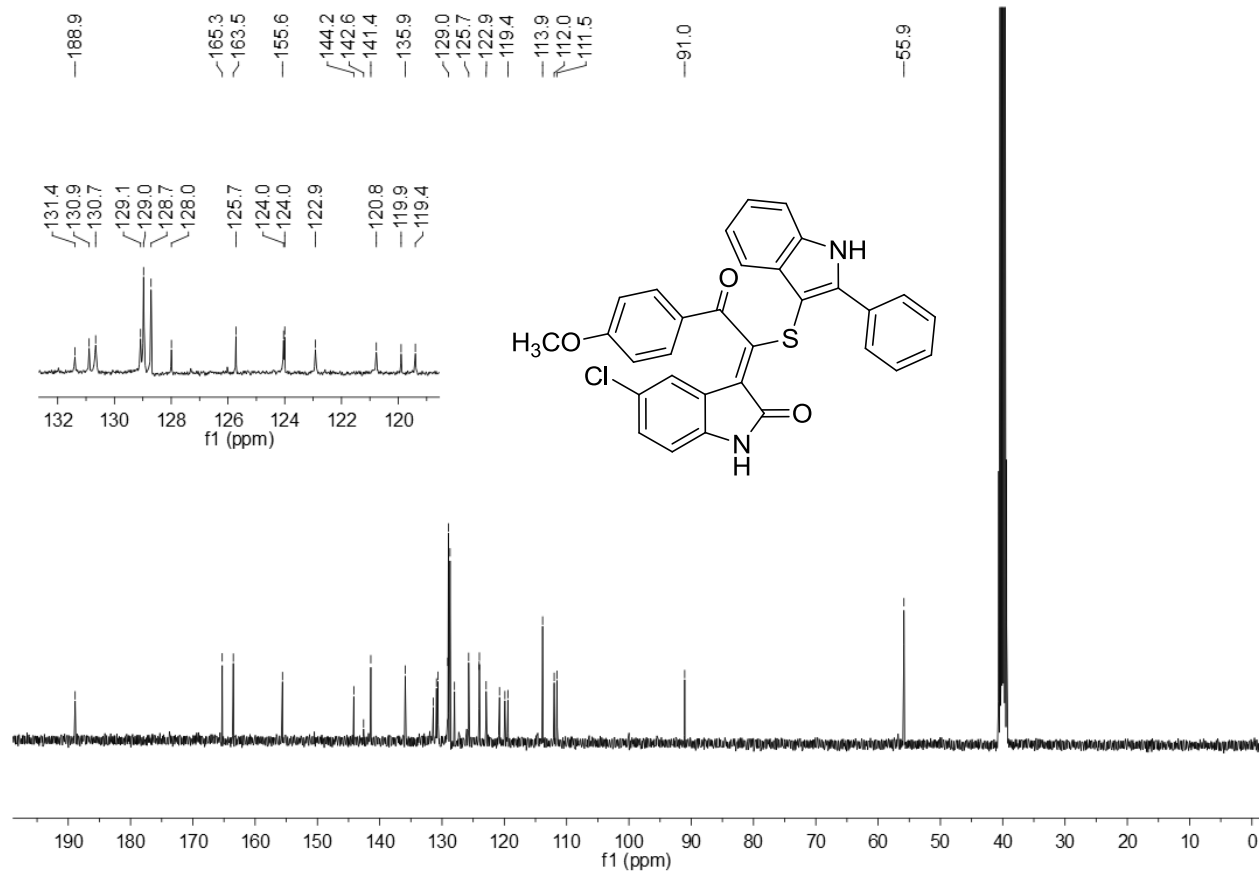

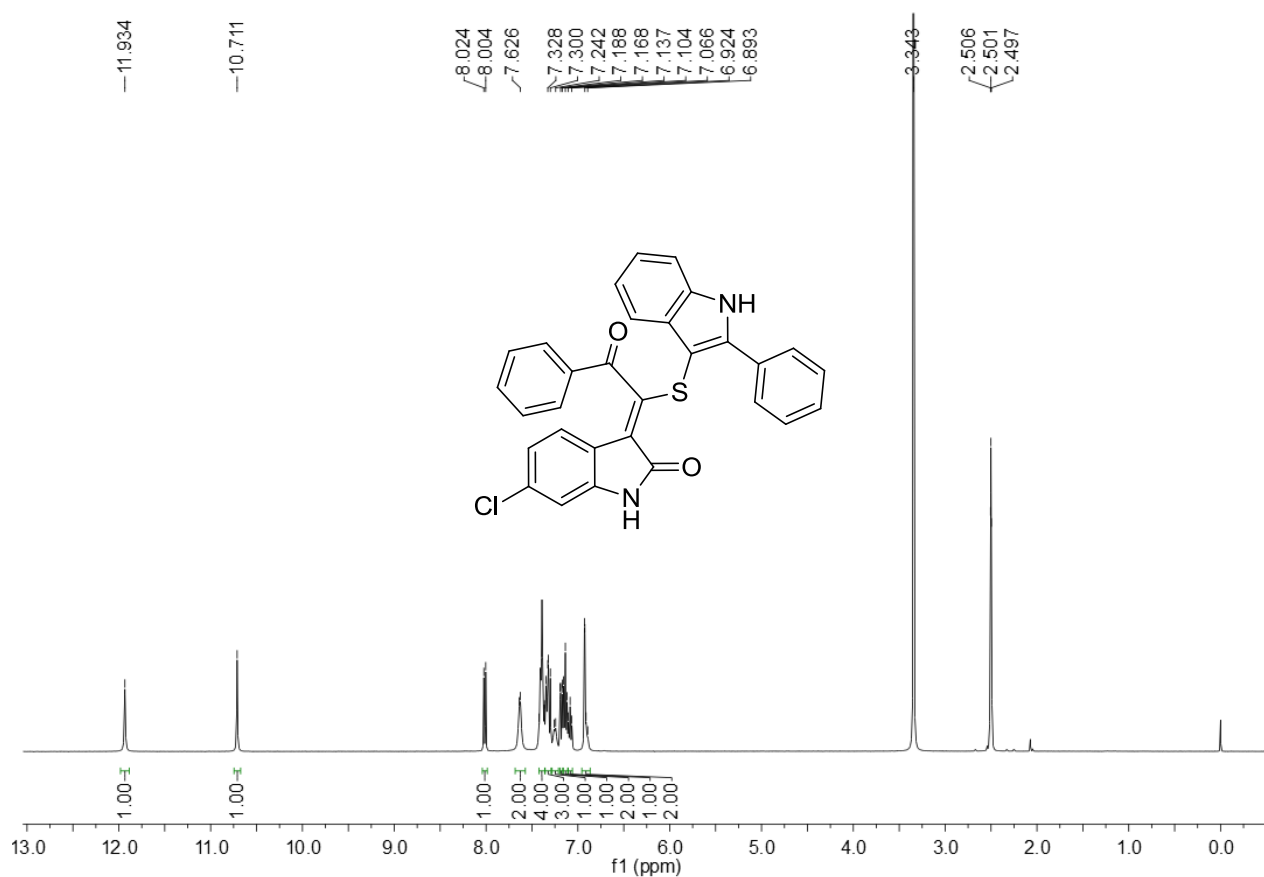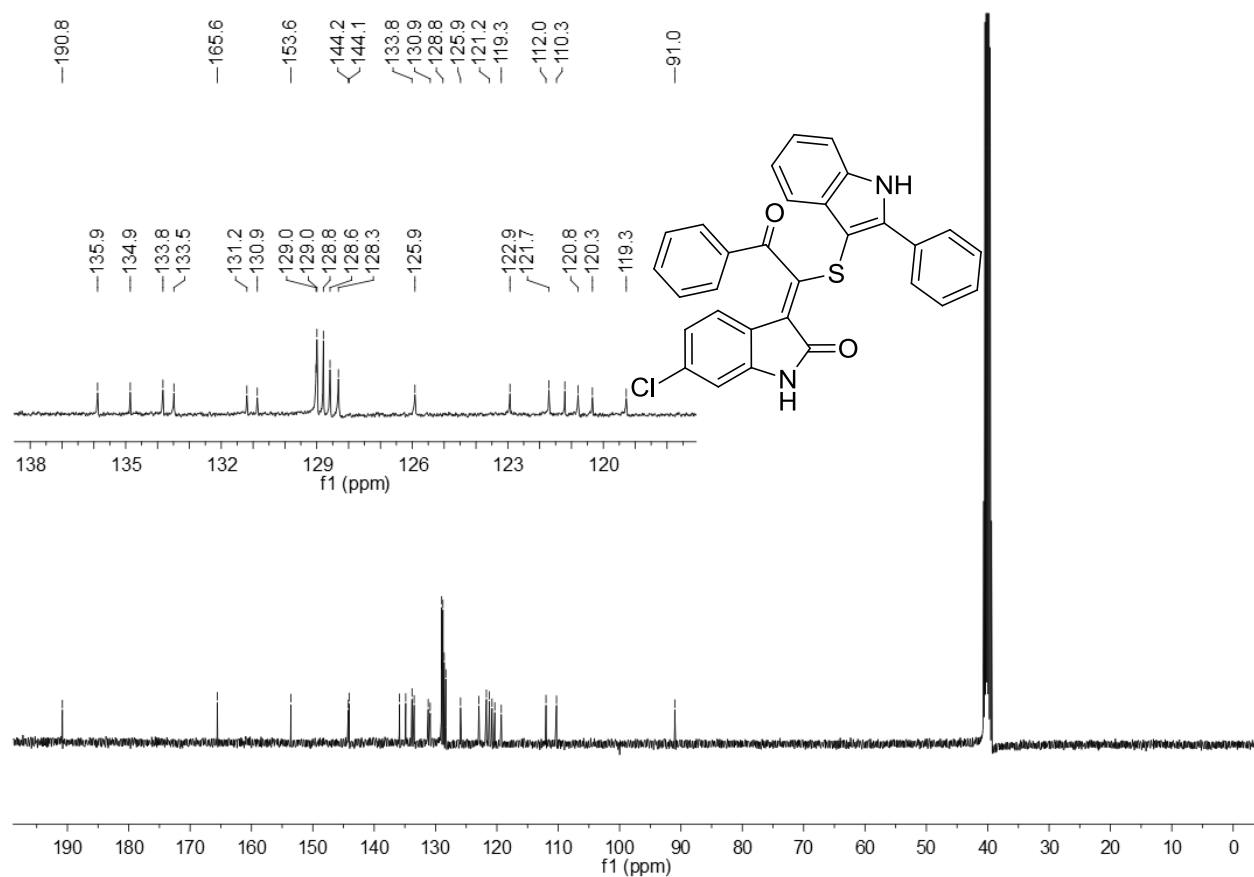

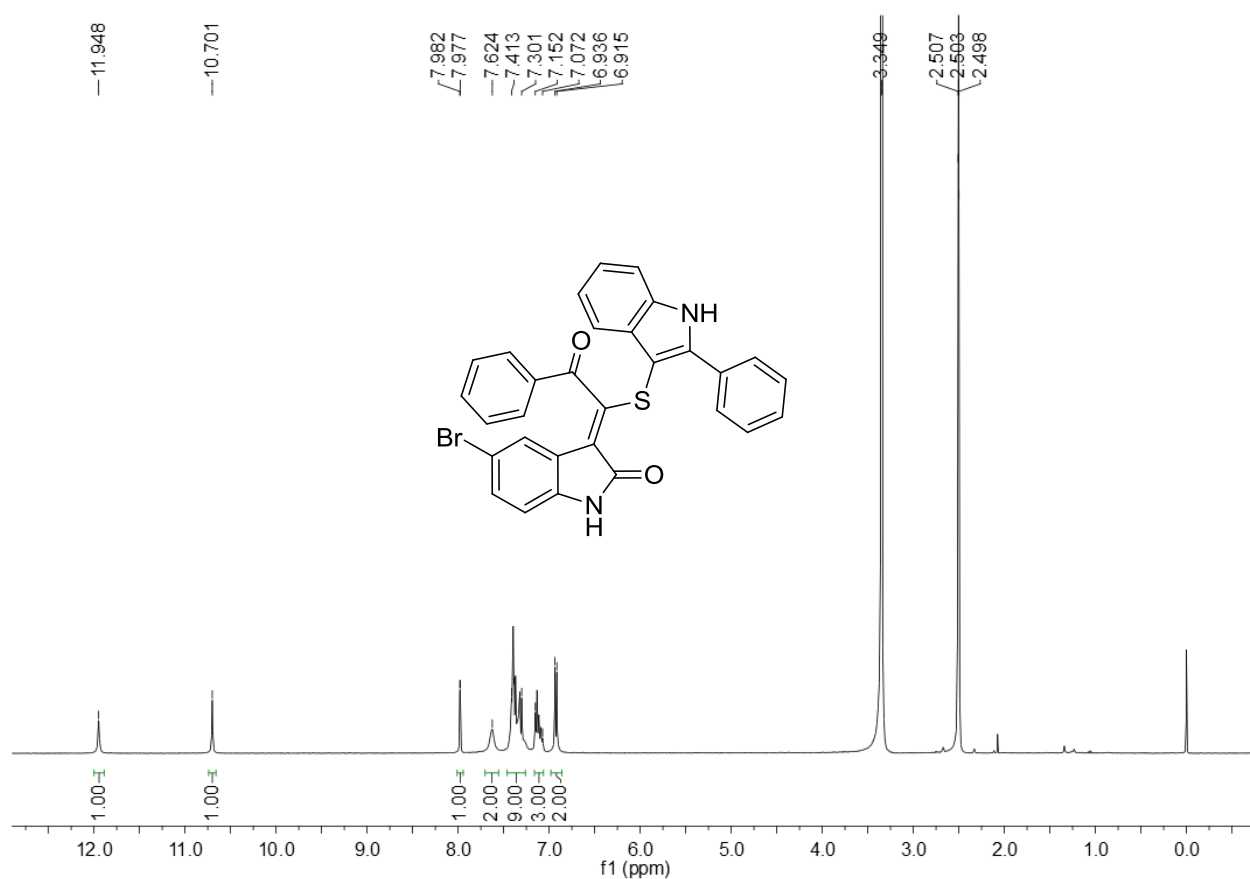

**<sup>1</sup>H NMR Spectrum of Compound 4j**

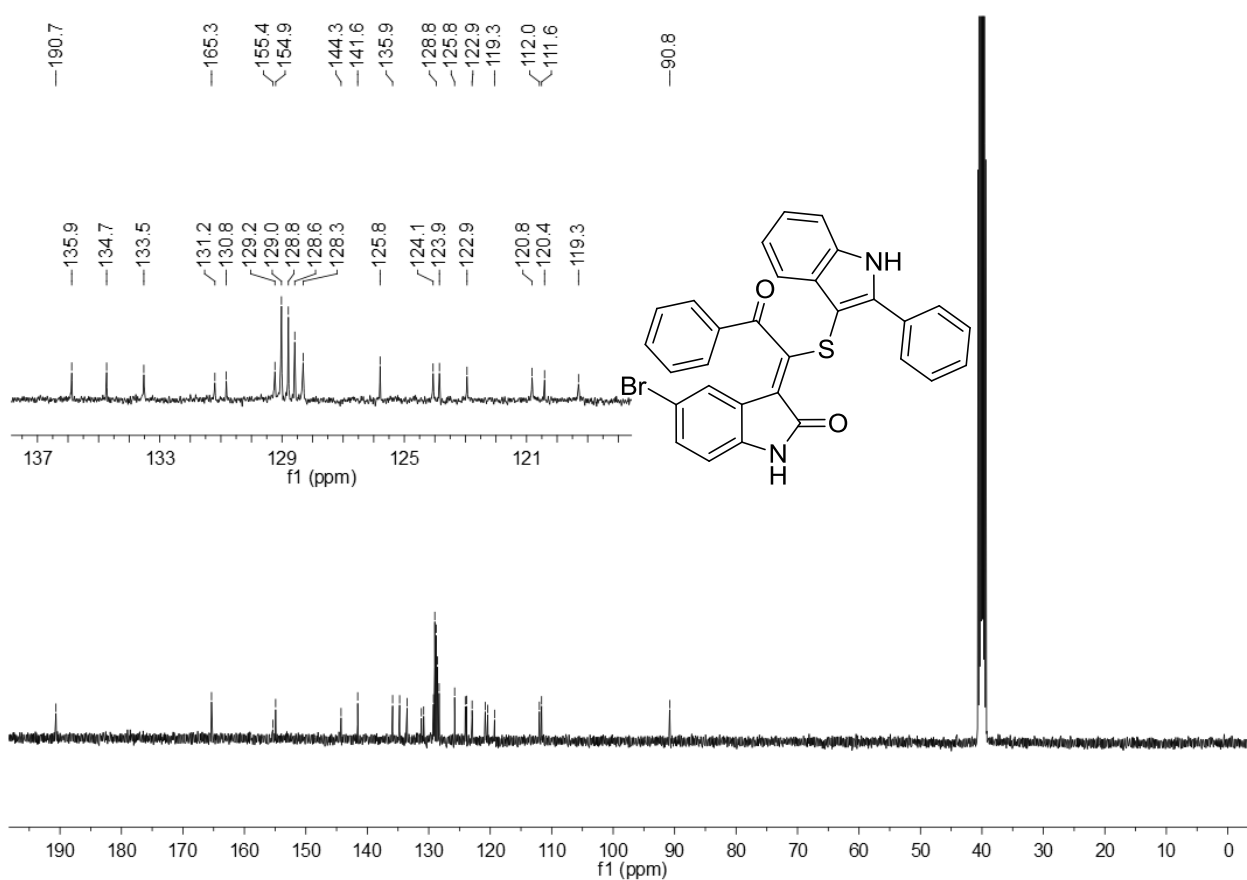

**<sup>13</sup>C NMR Spectrum of Compound 4j**

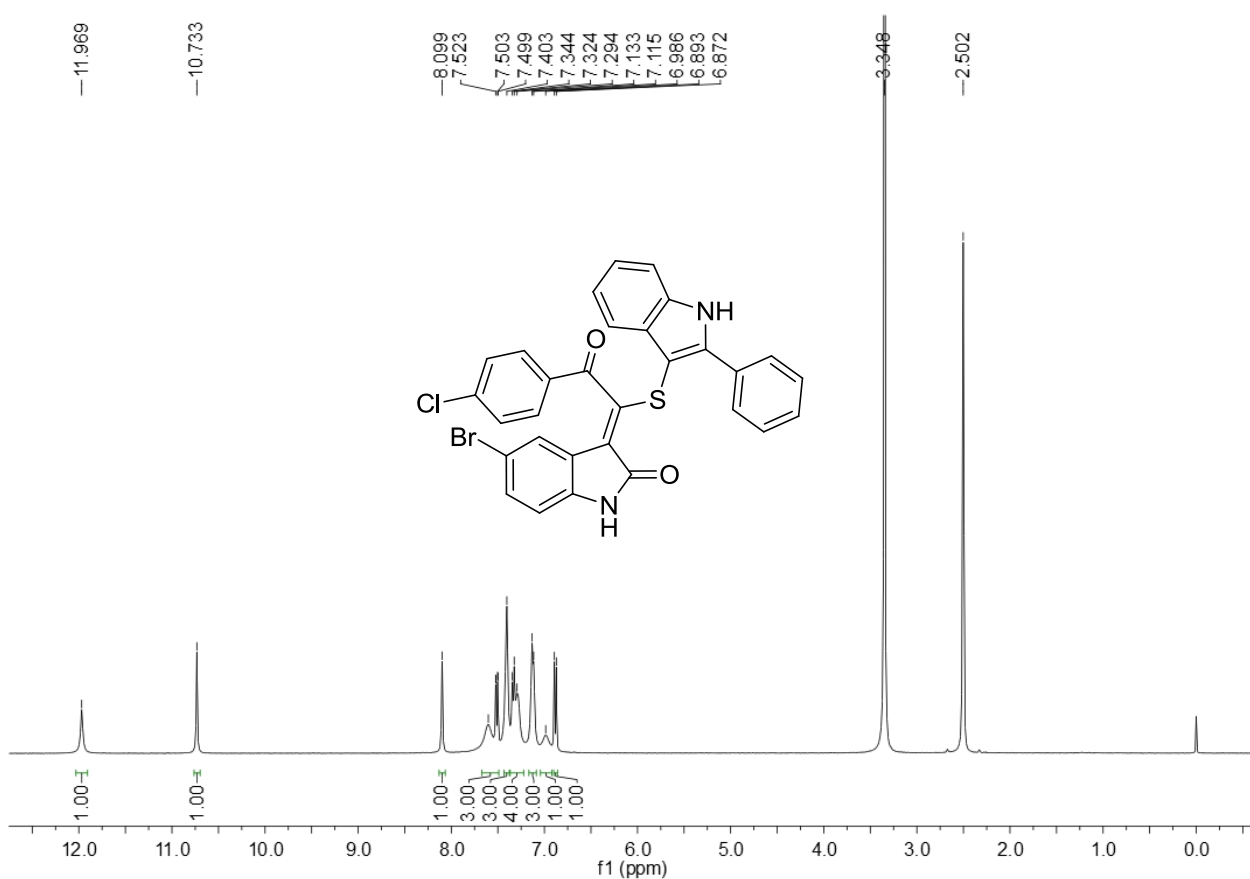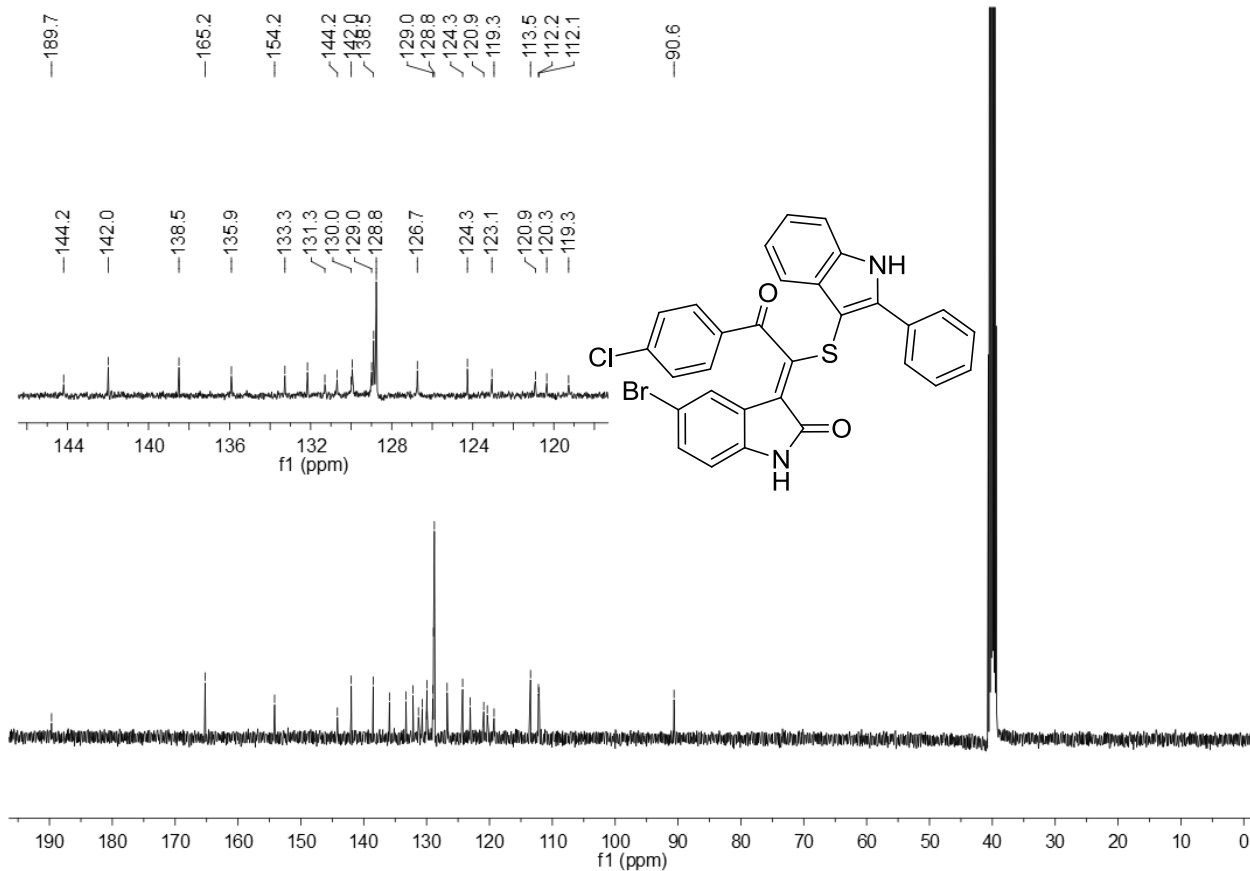

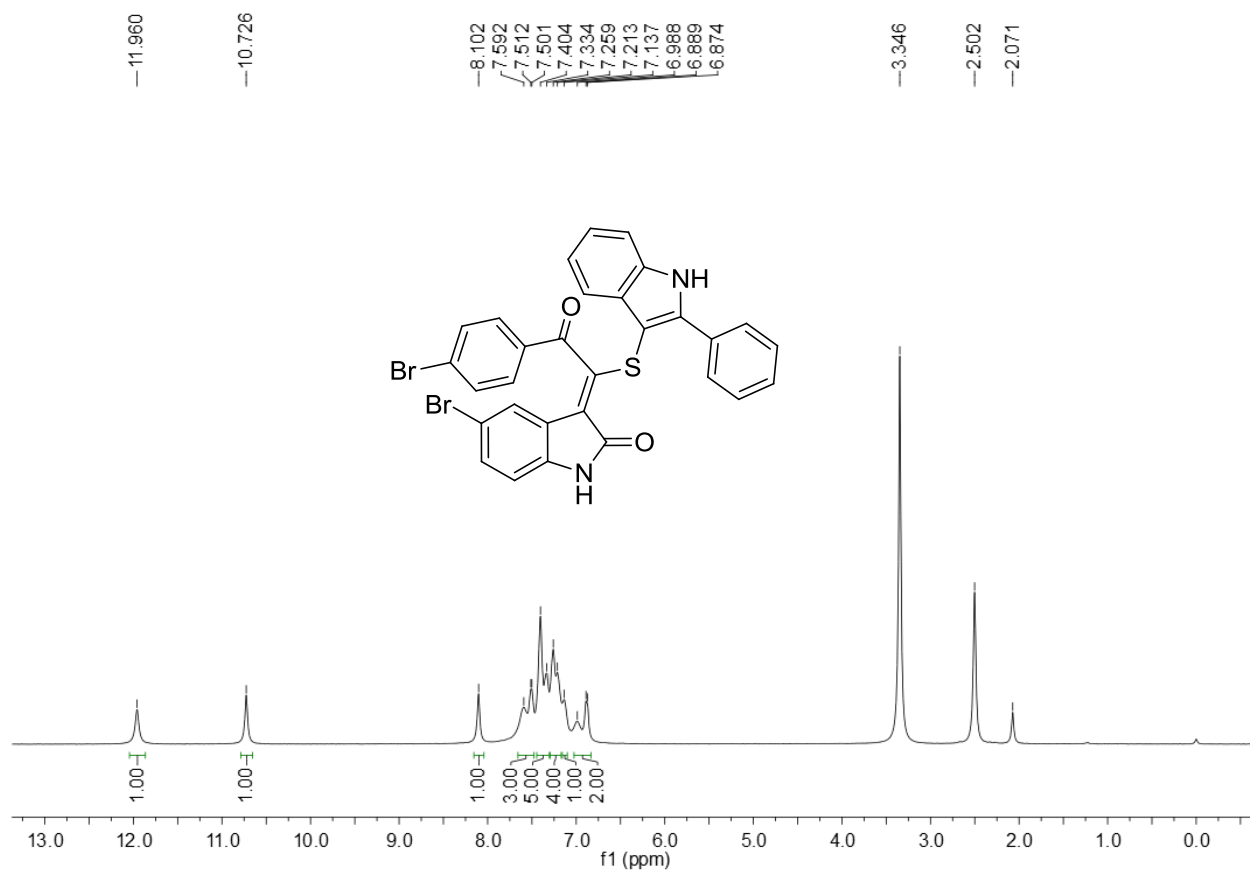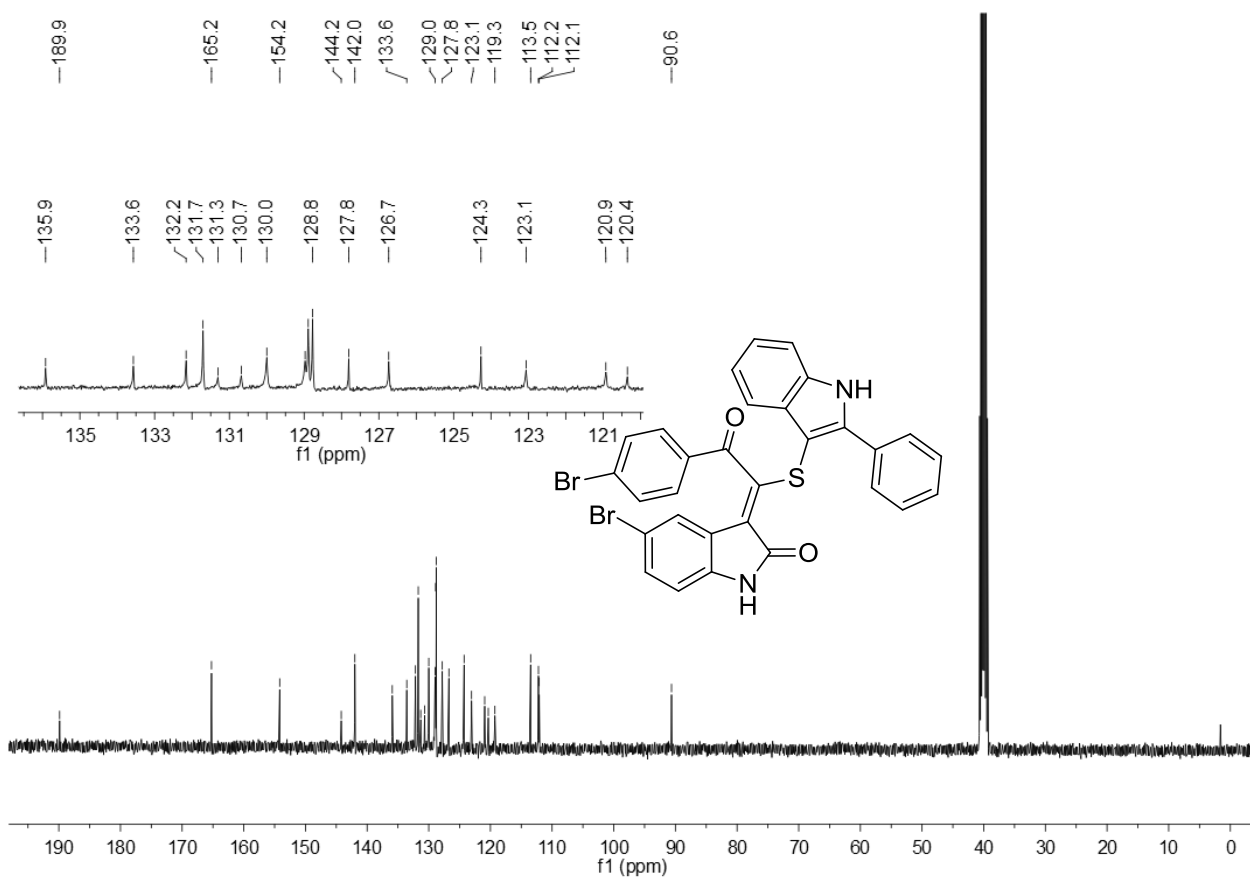

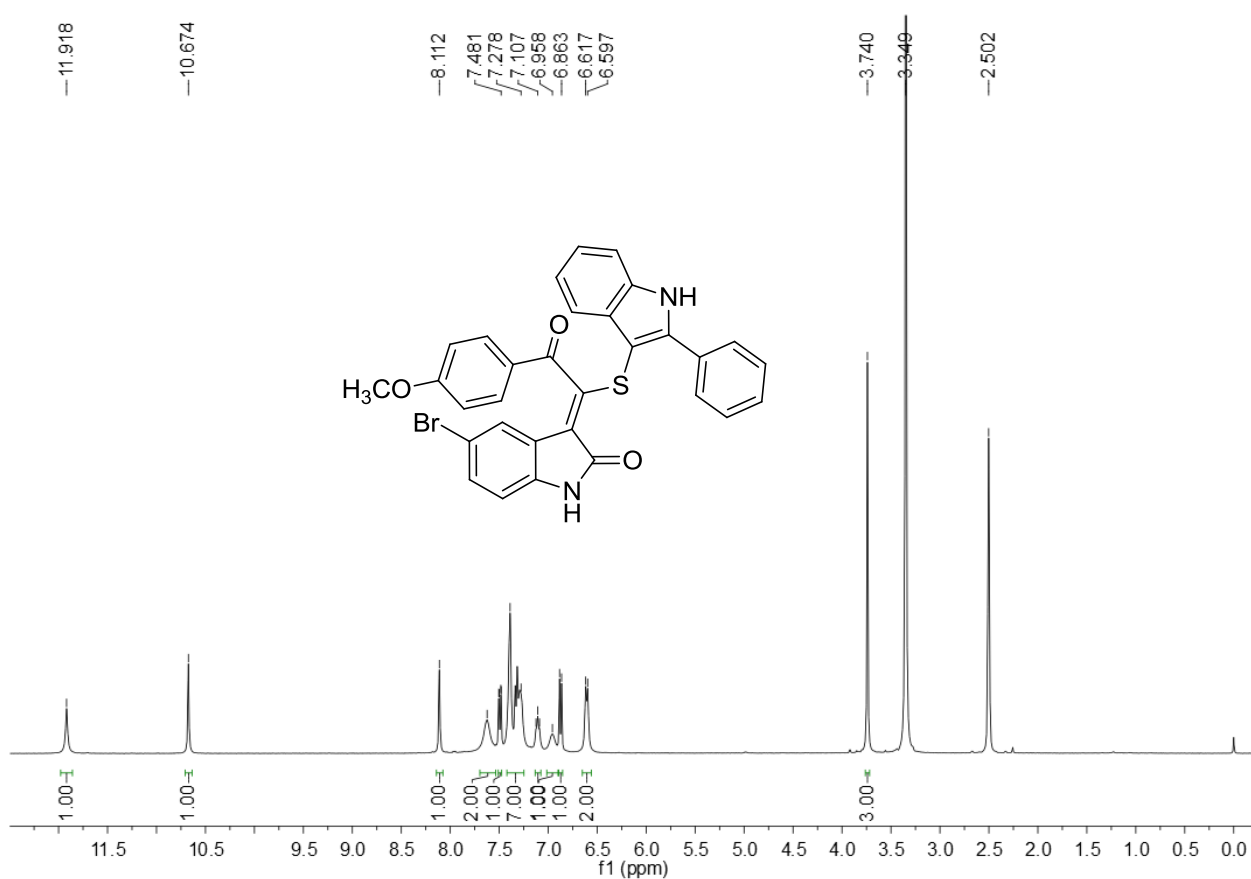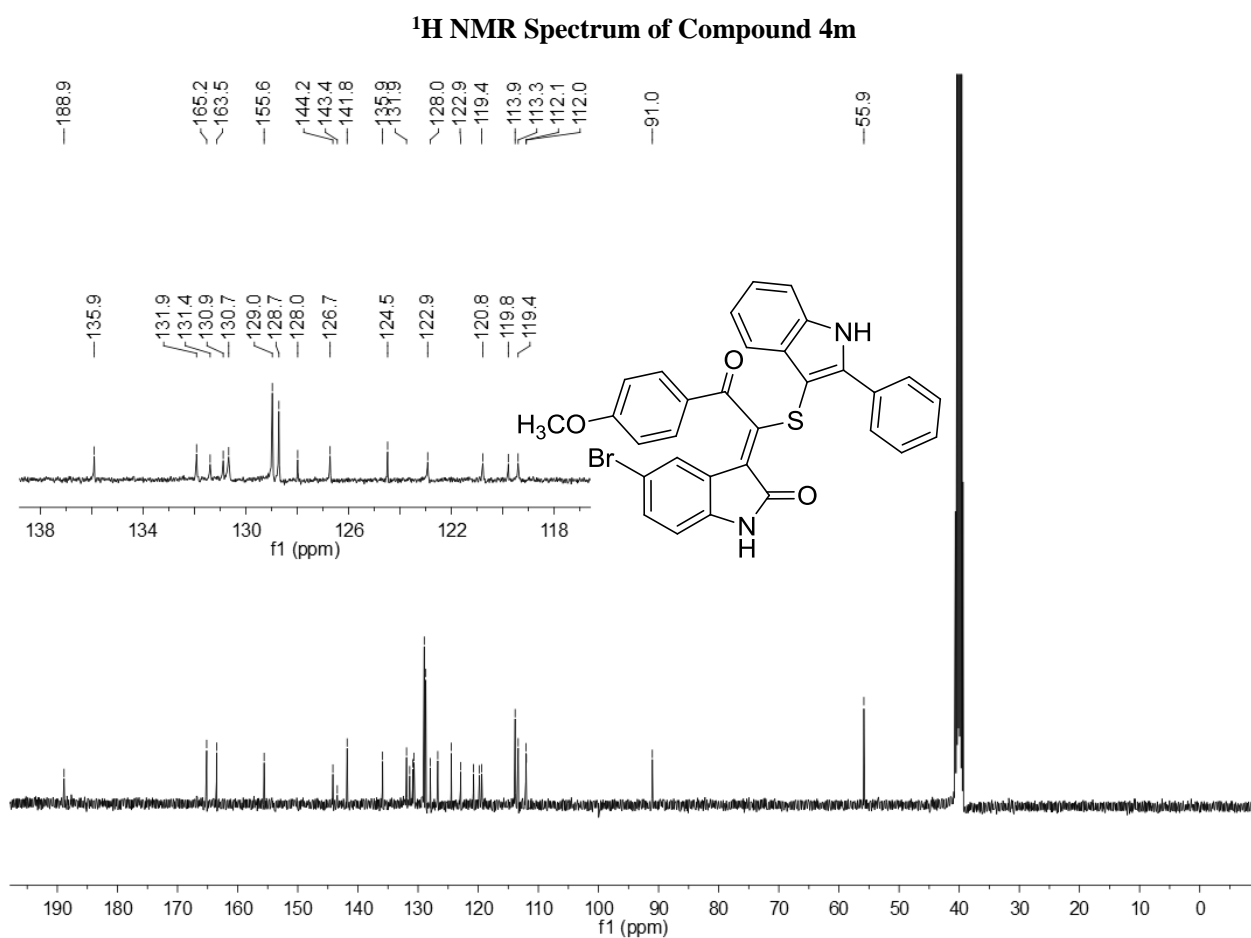

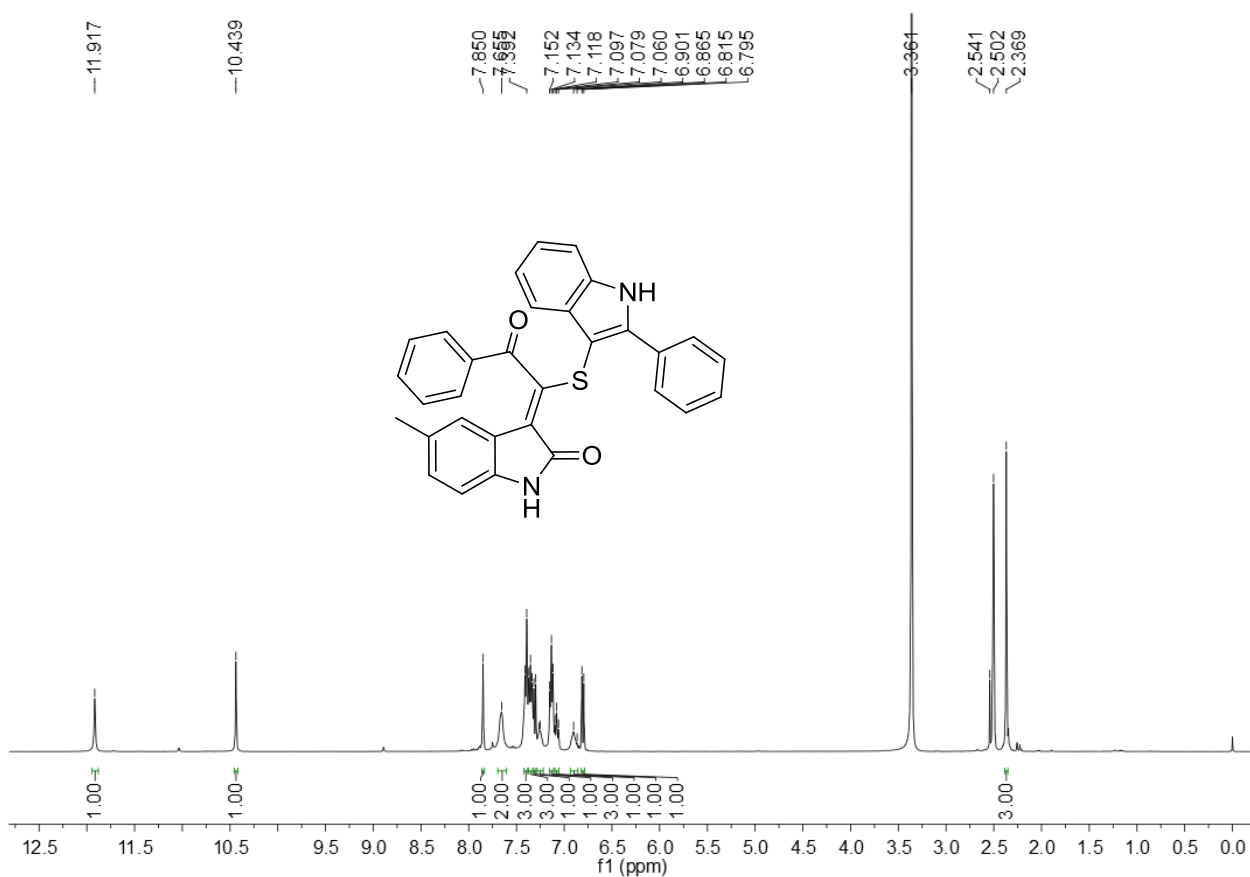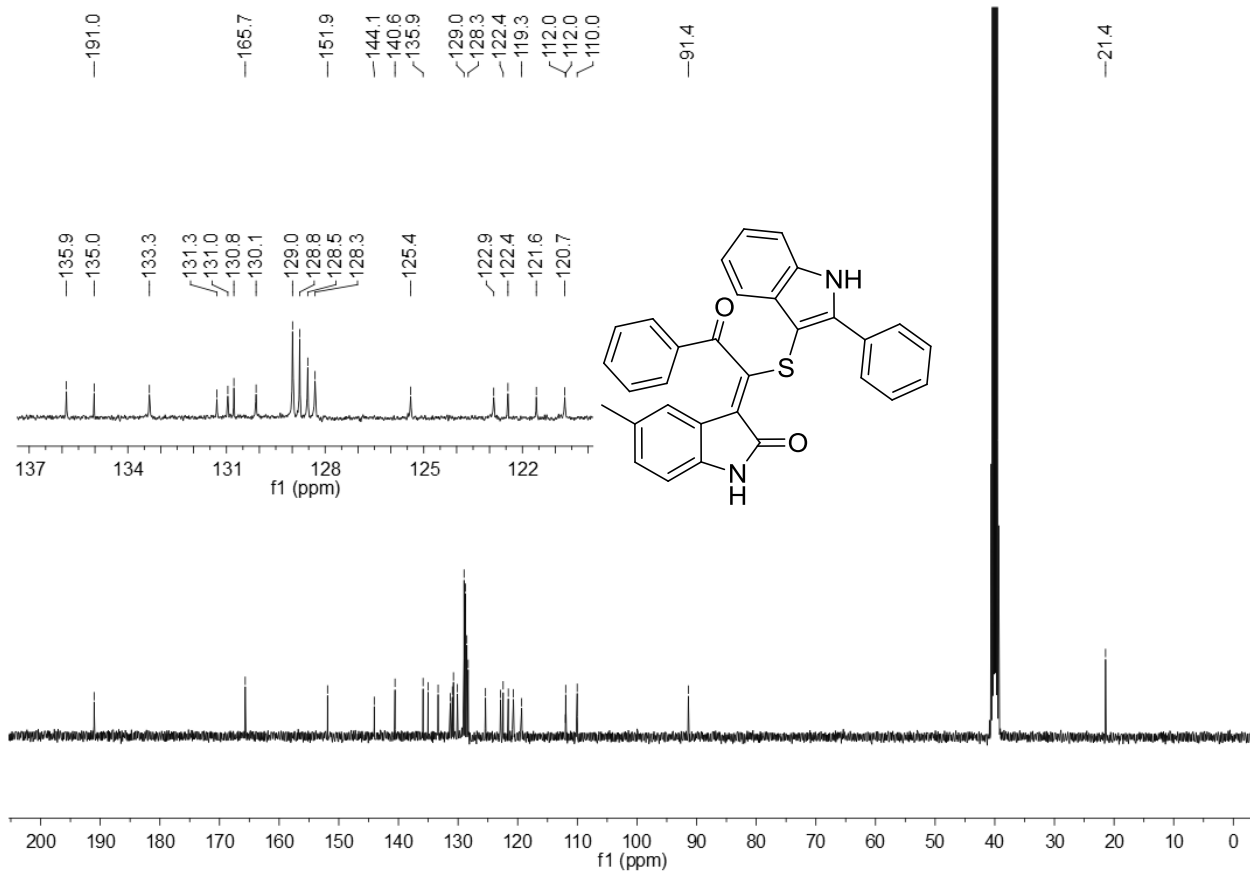

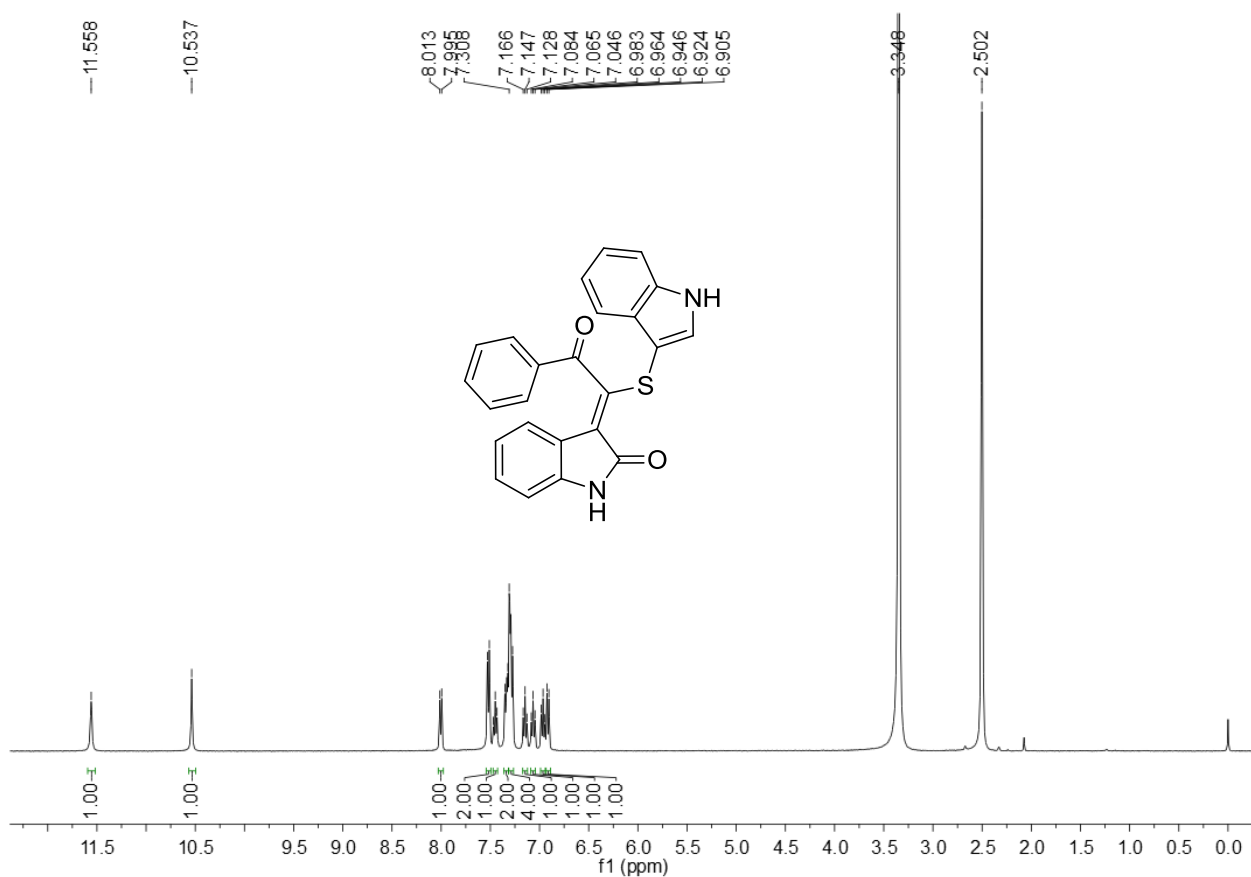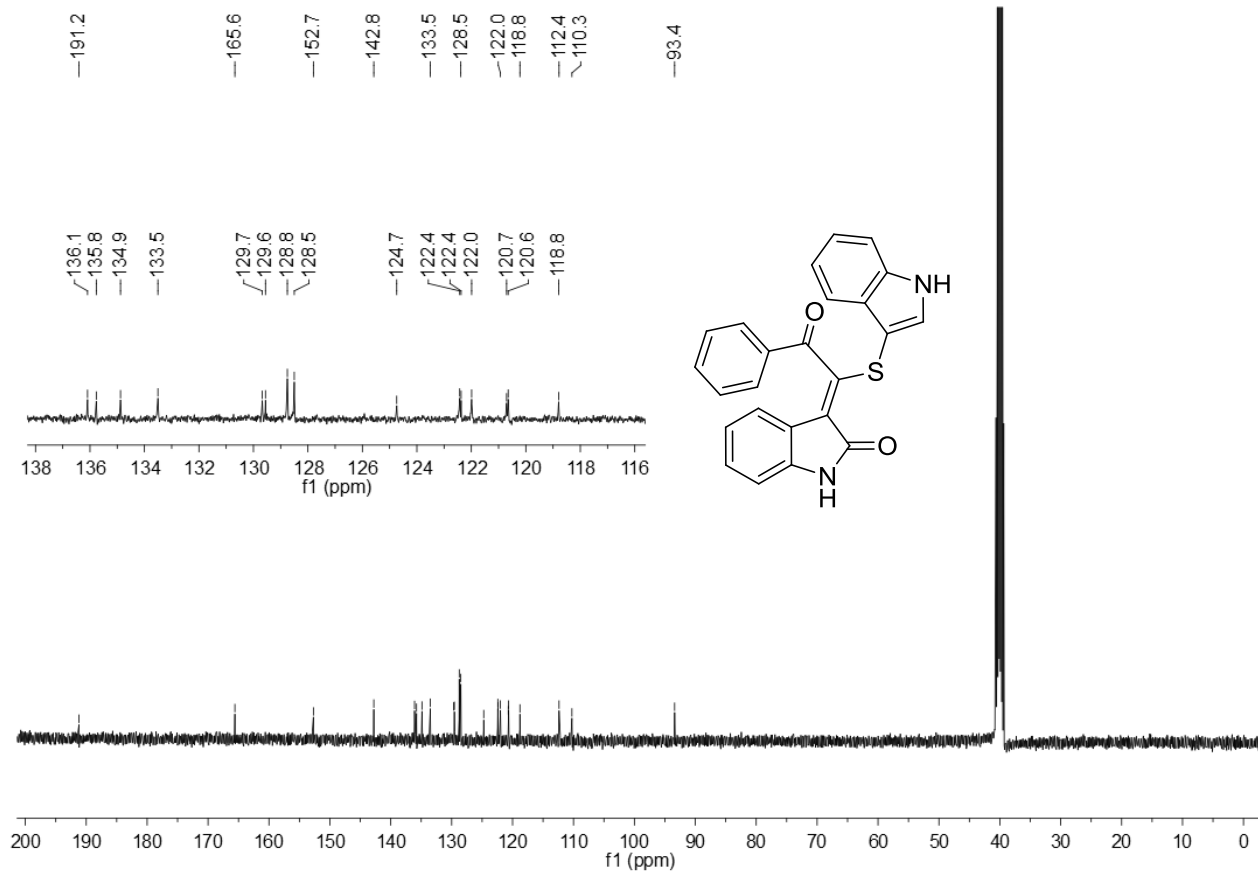



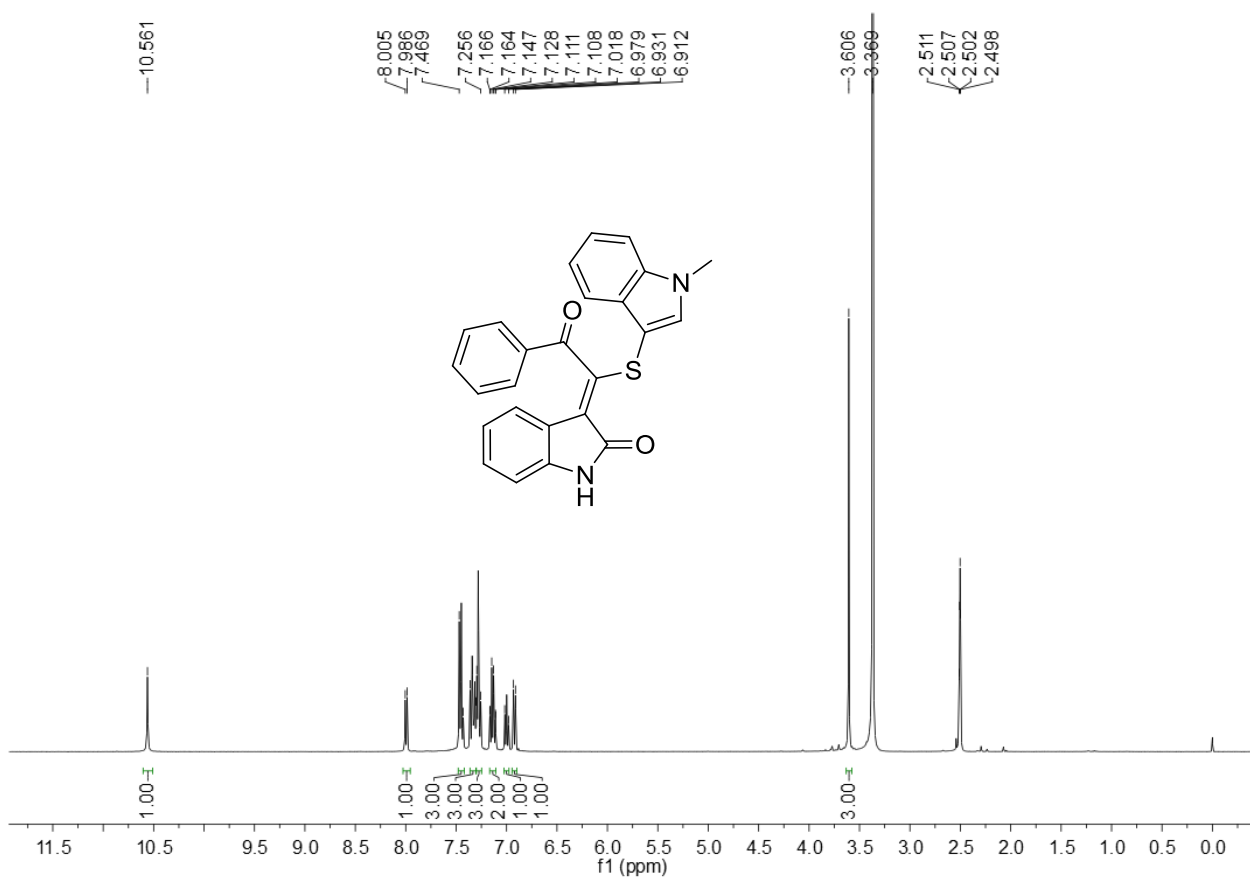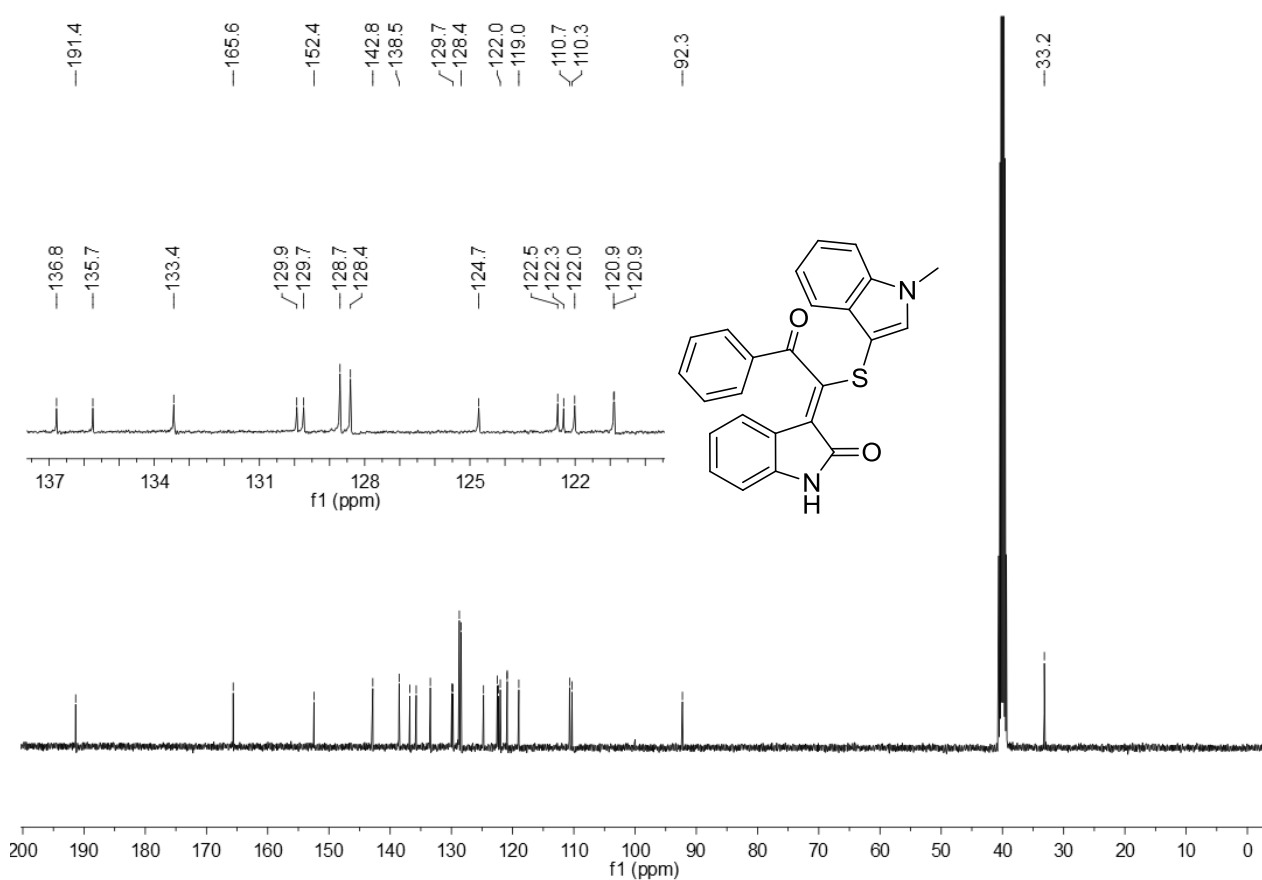

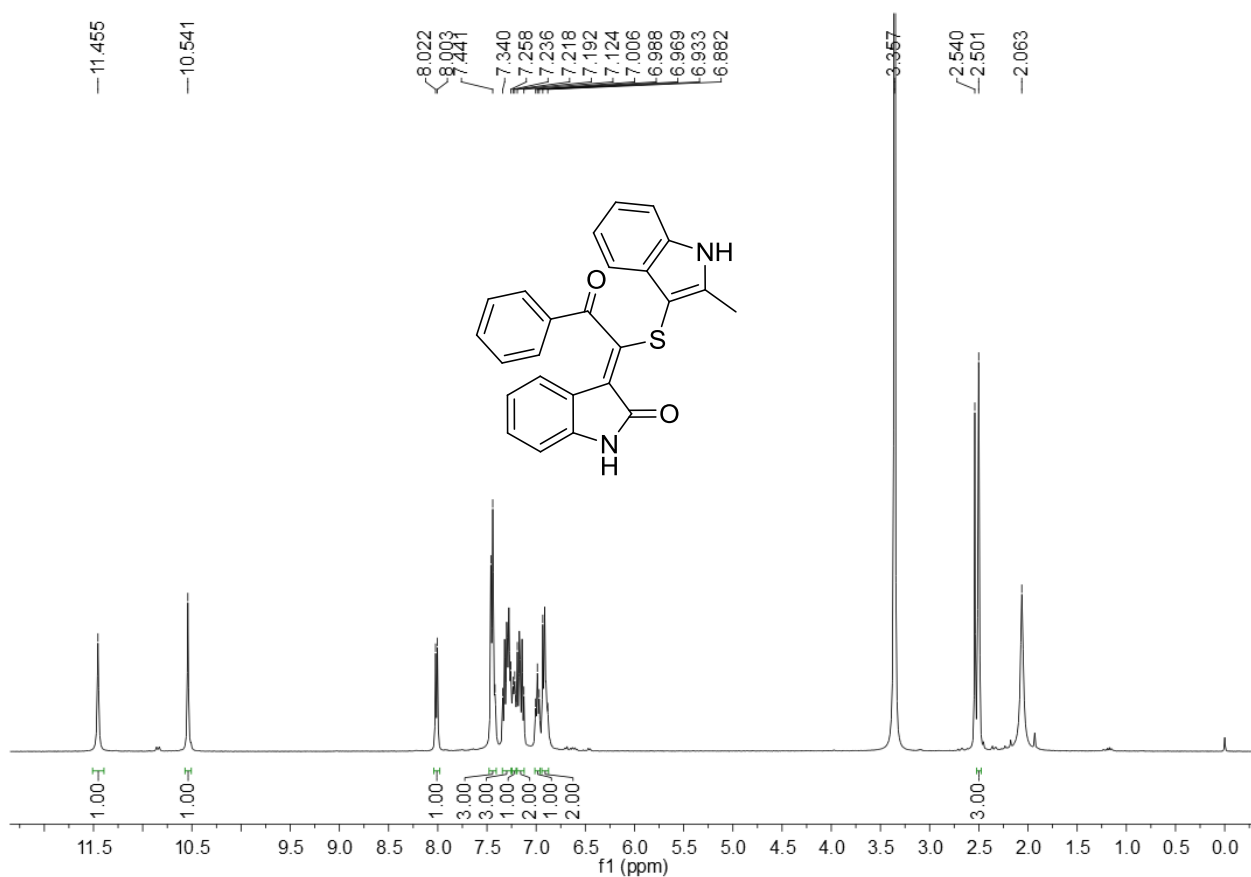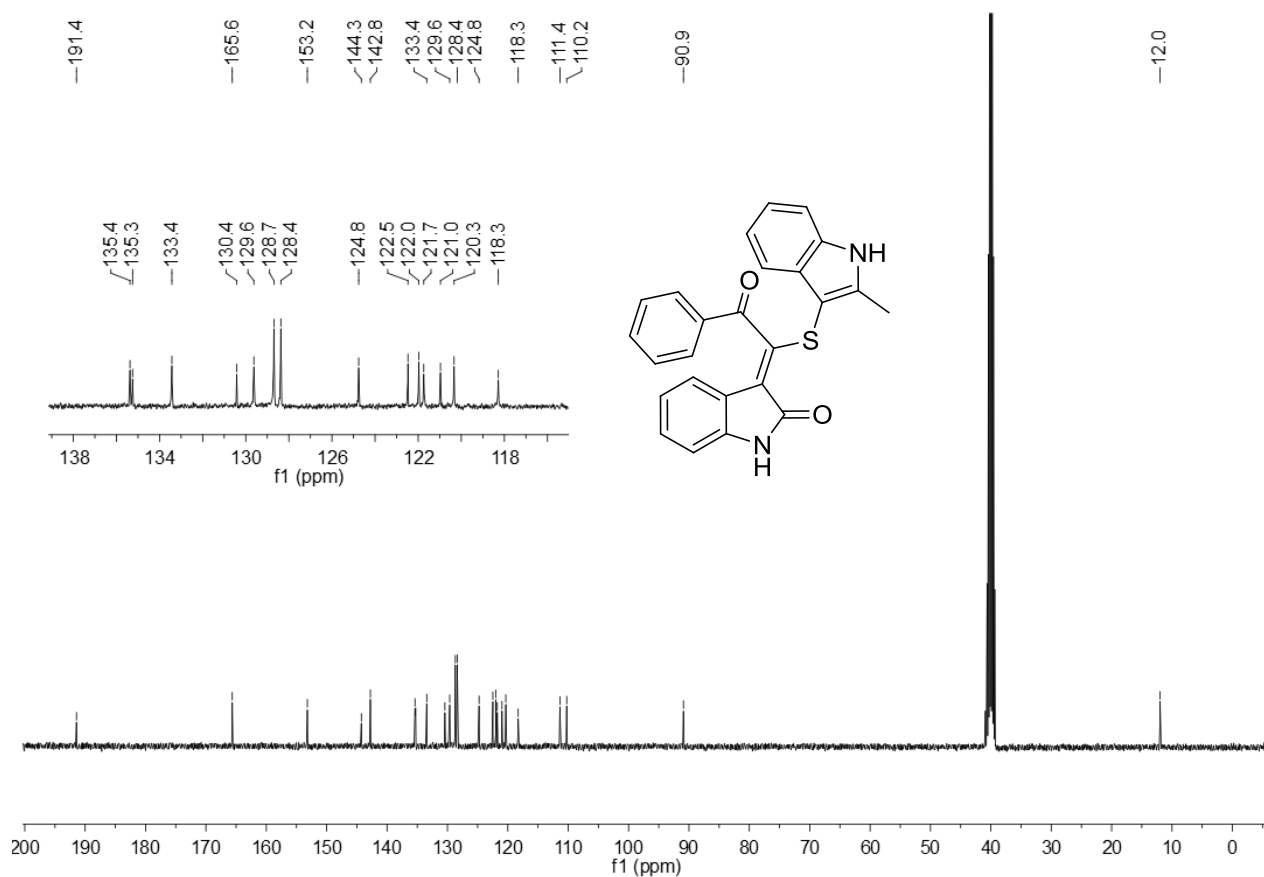

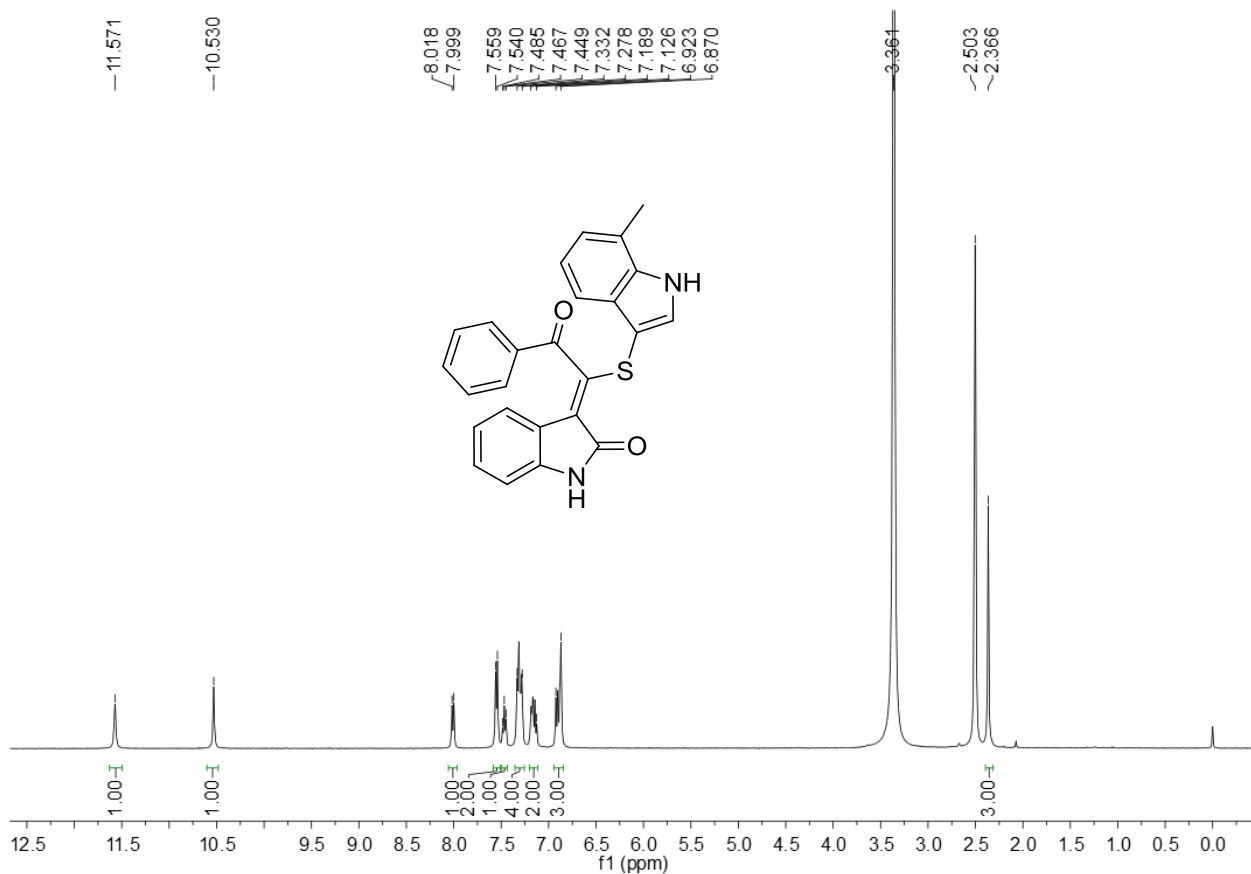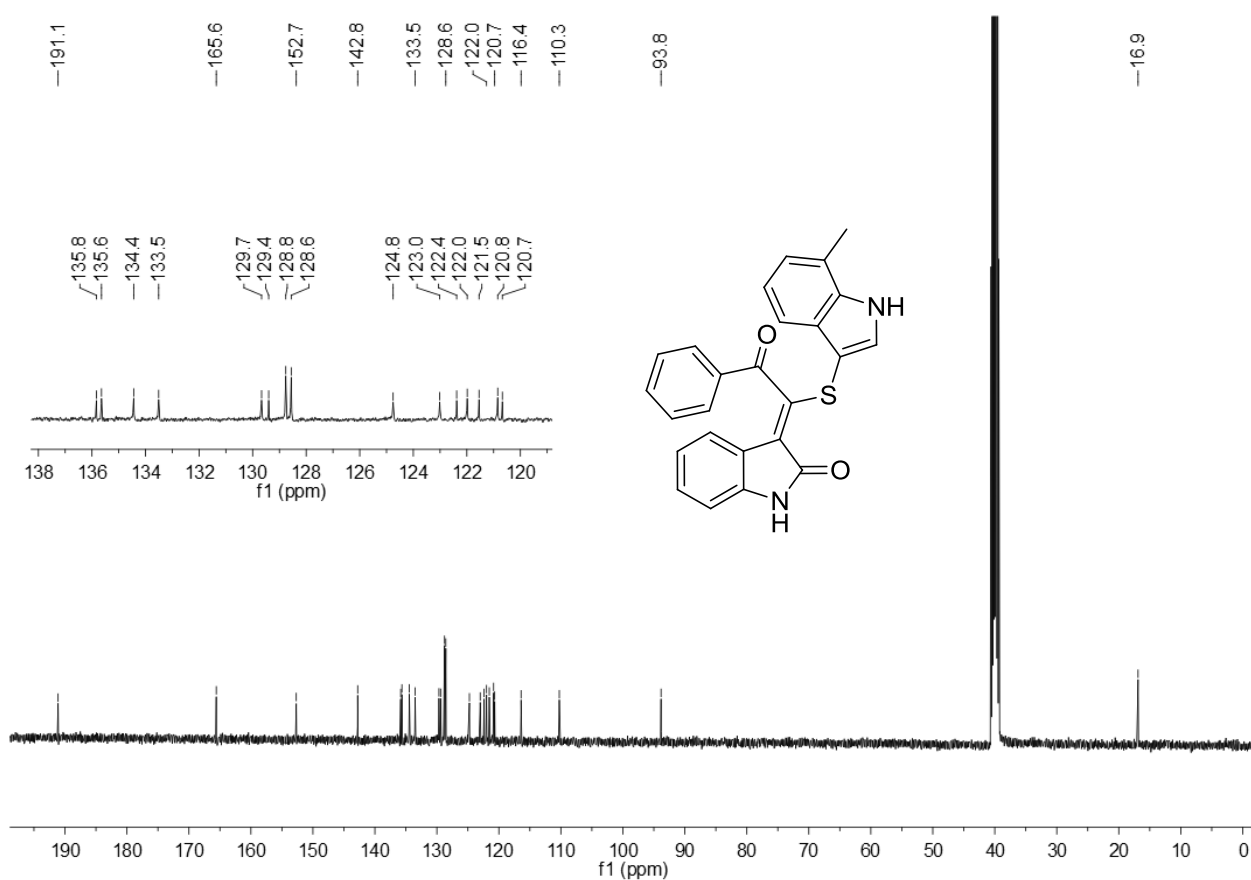

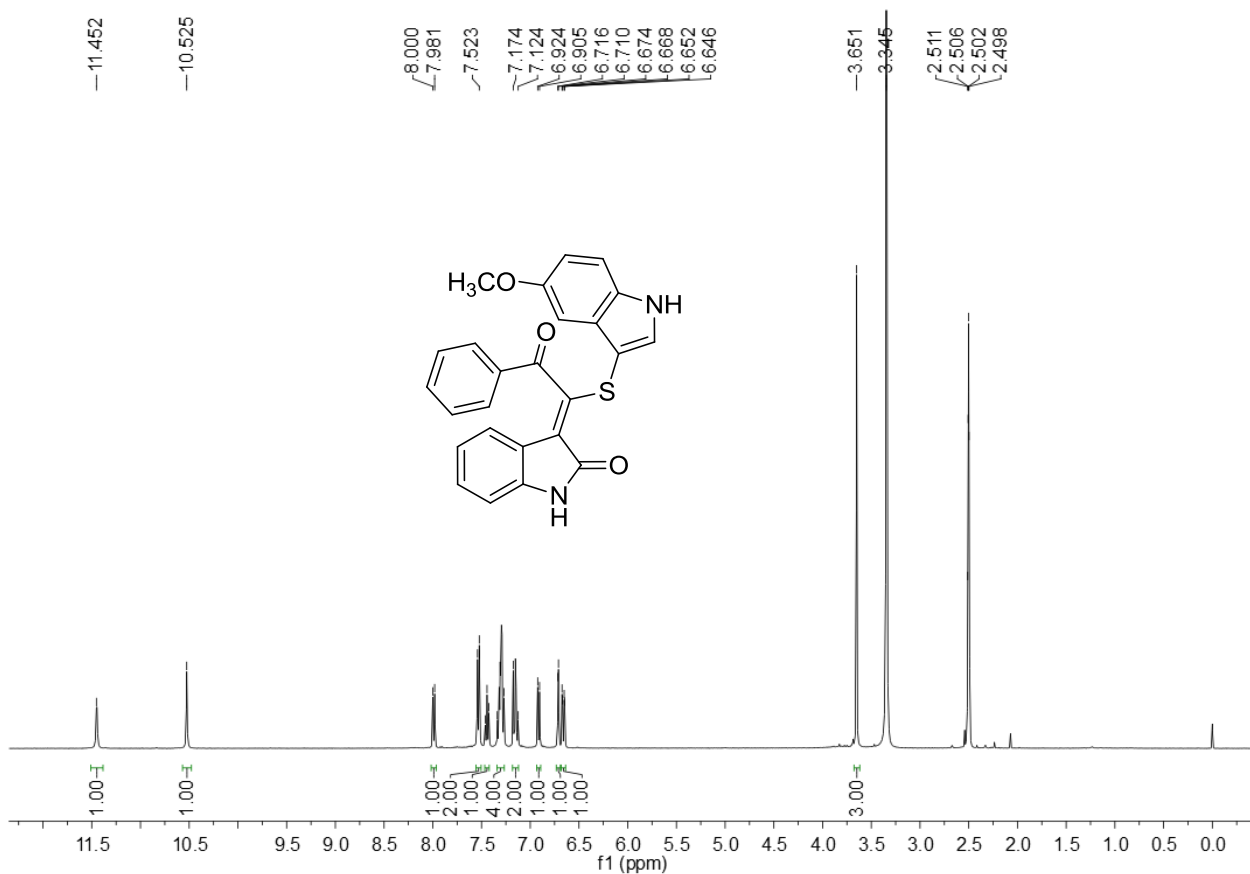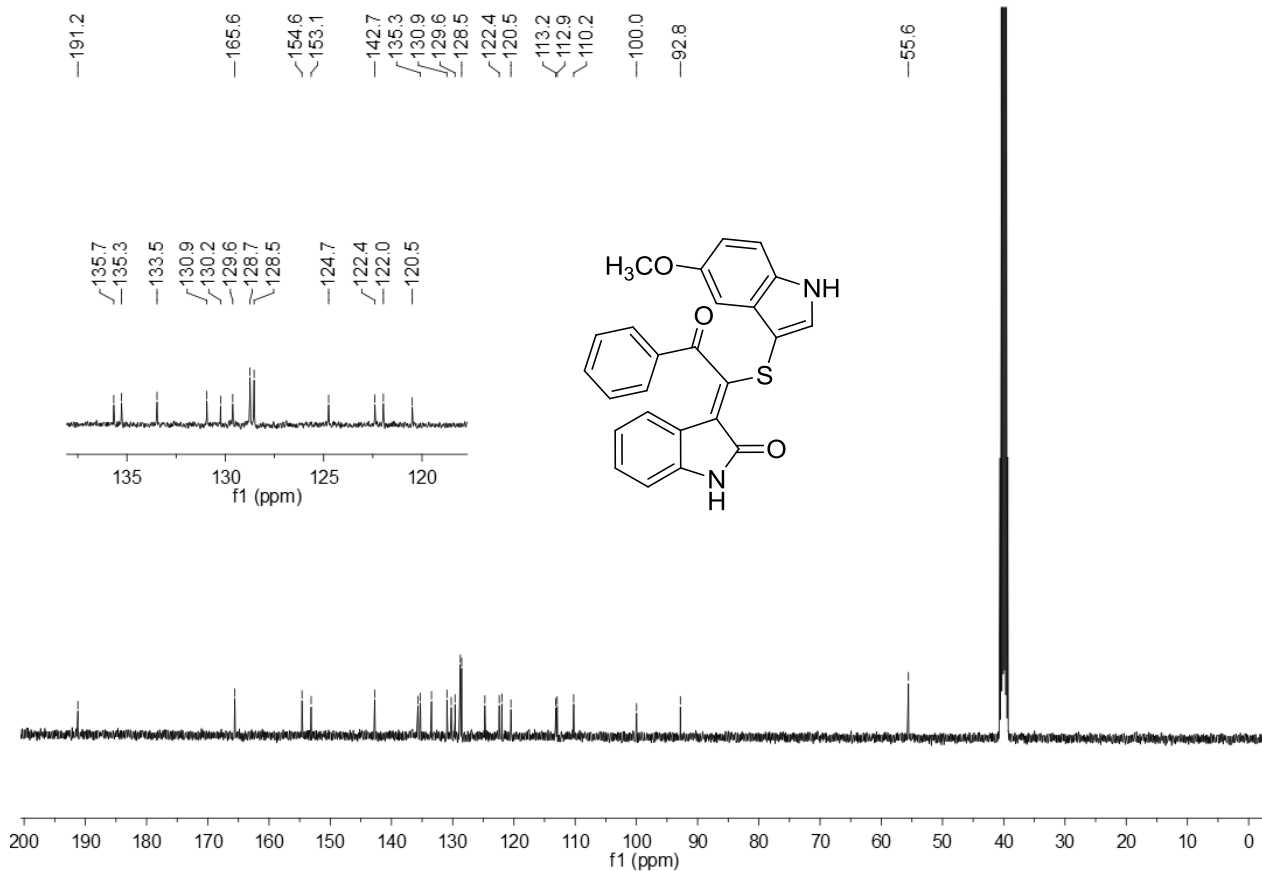

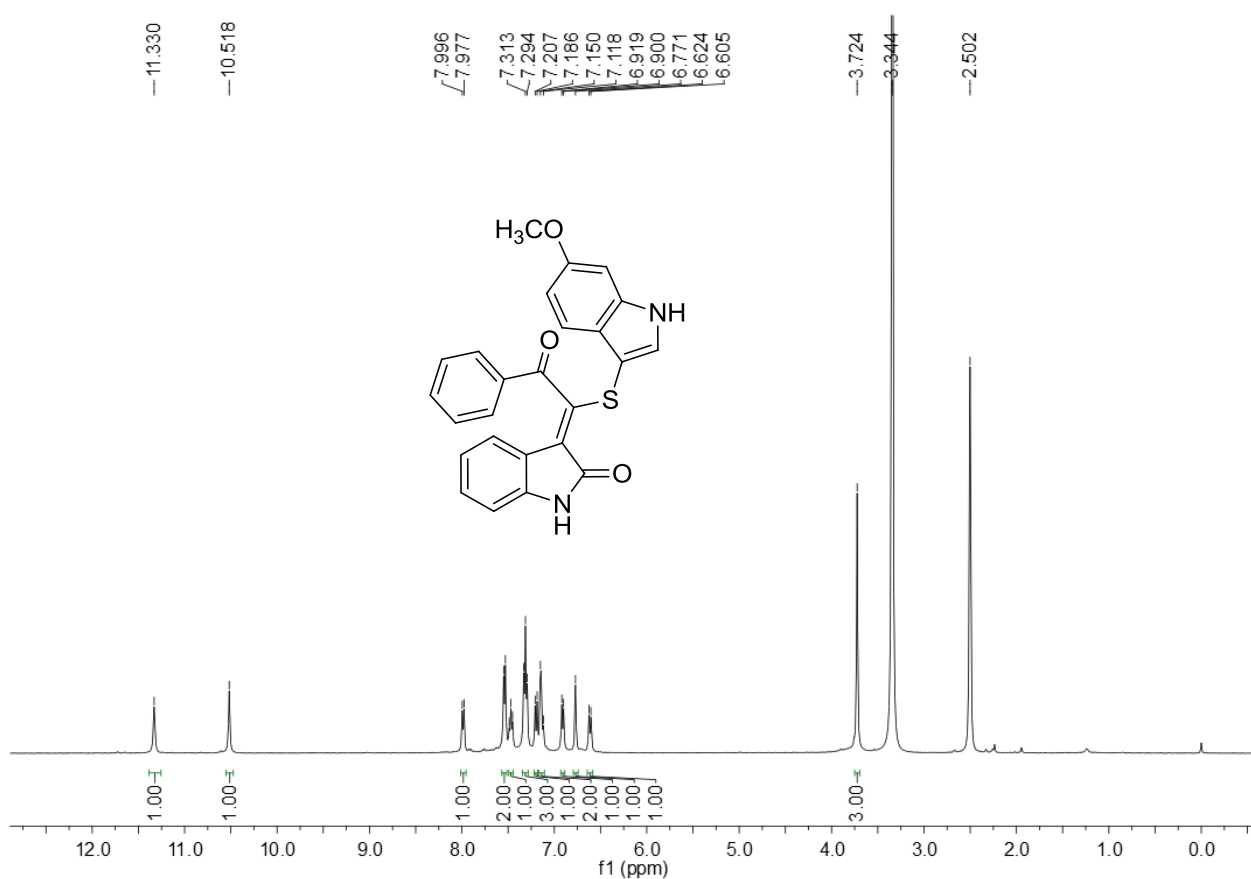

**<sup>1</sup>H NMR Spectrum of Compound 4t**

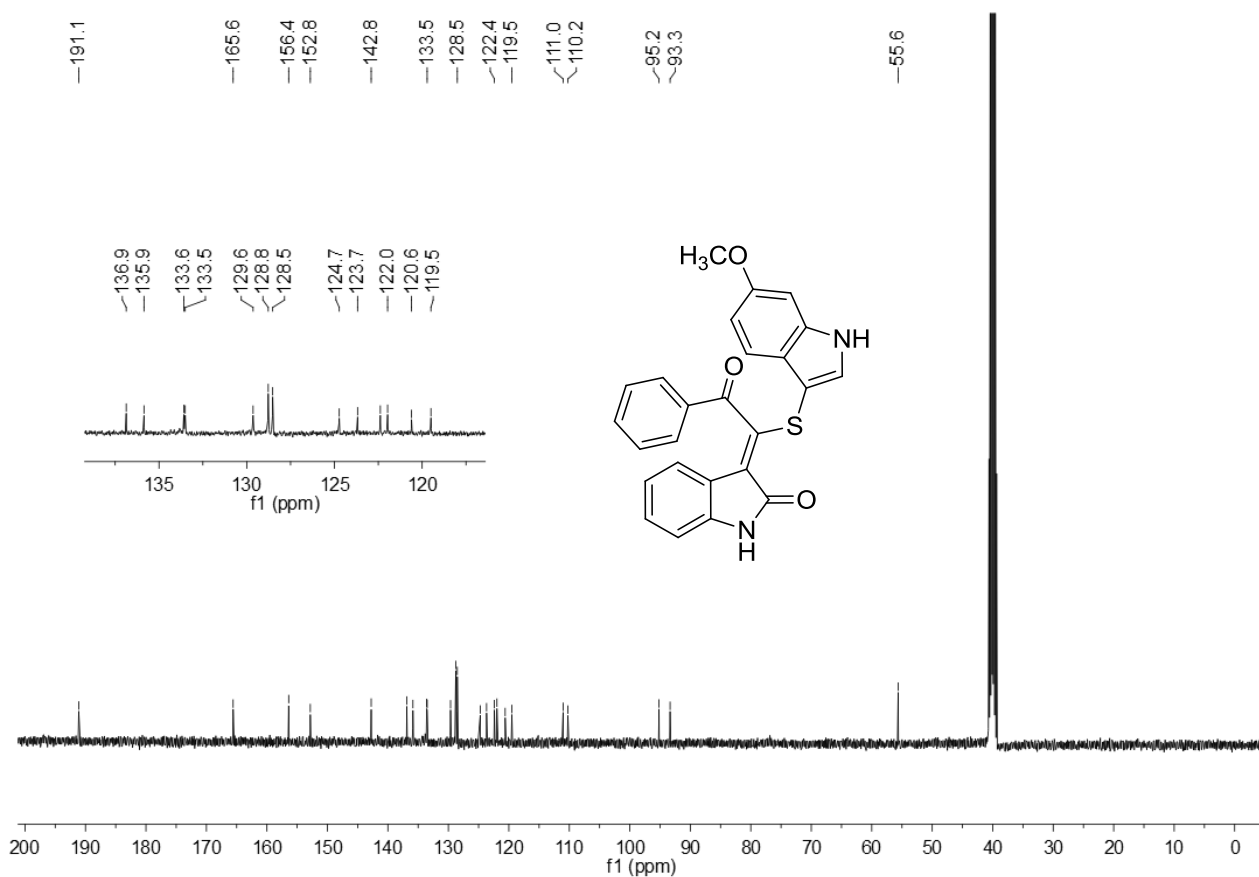

**<sup>13</sup>C NMR Spectrum of Compound 4t**

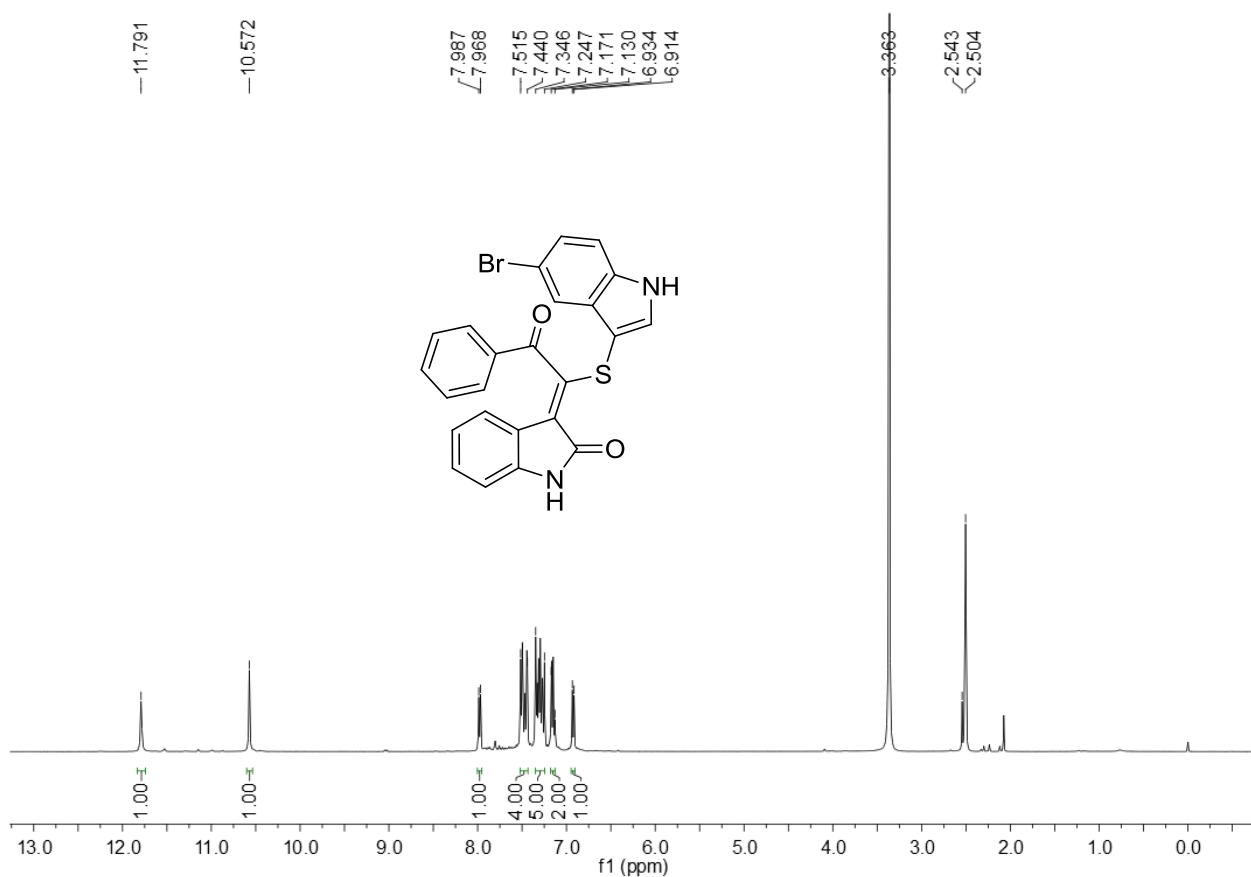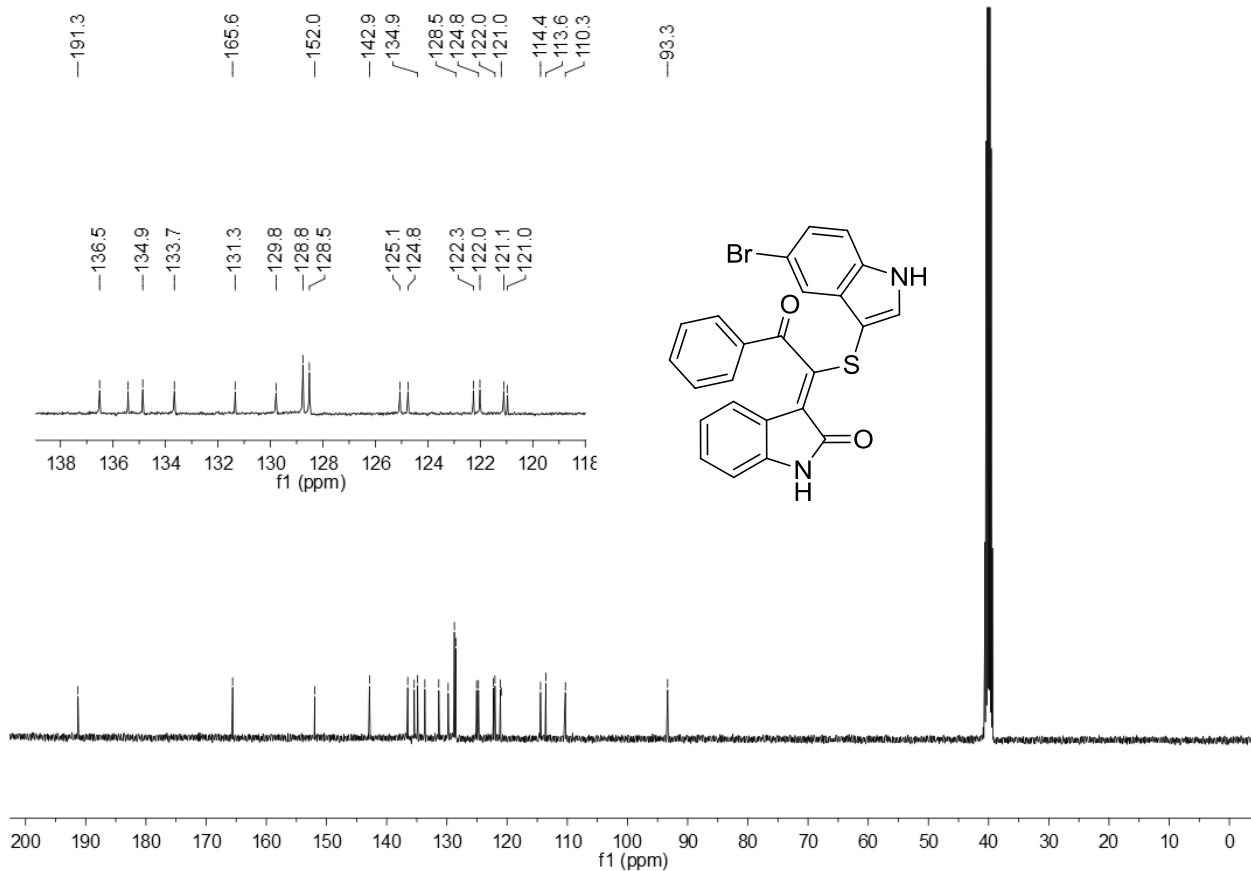

# Copies of $^1\text{H}$ NMR and $^{13}\text{C}$ NMR of Compounds 5a-5o

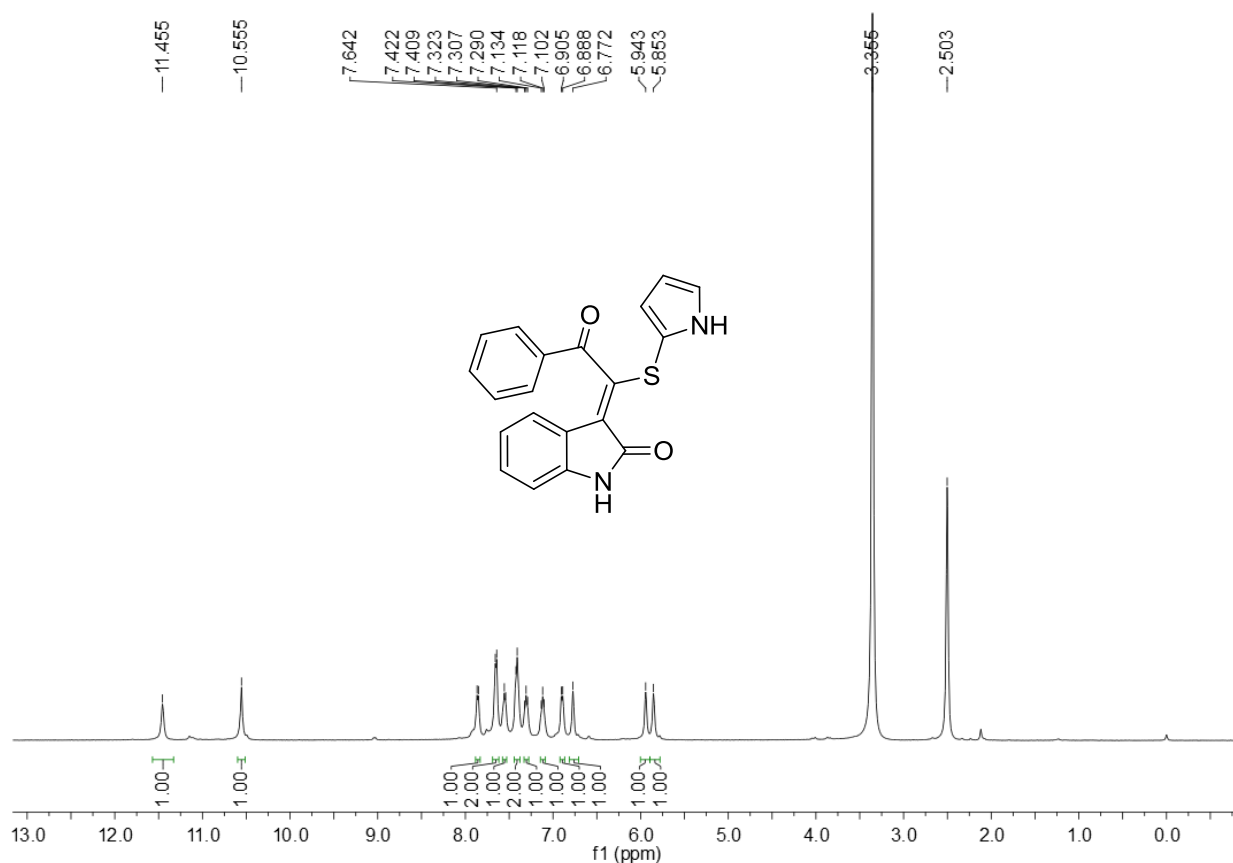

$^1\text{H}$  NMR Spectrum of Compound 5a

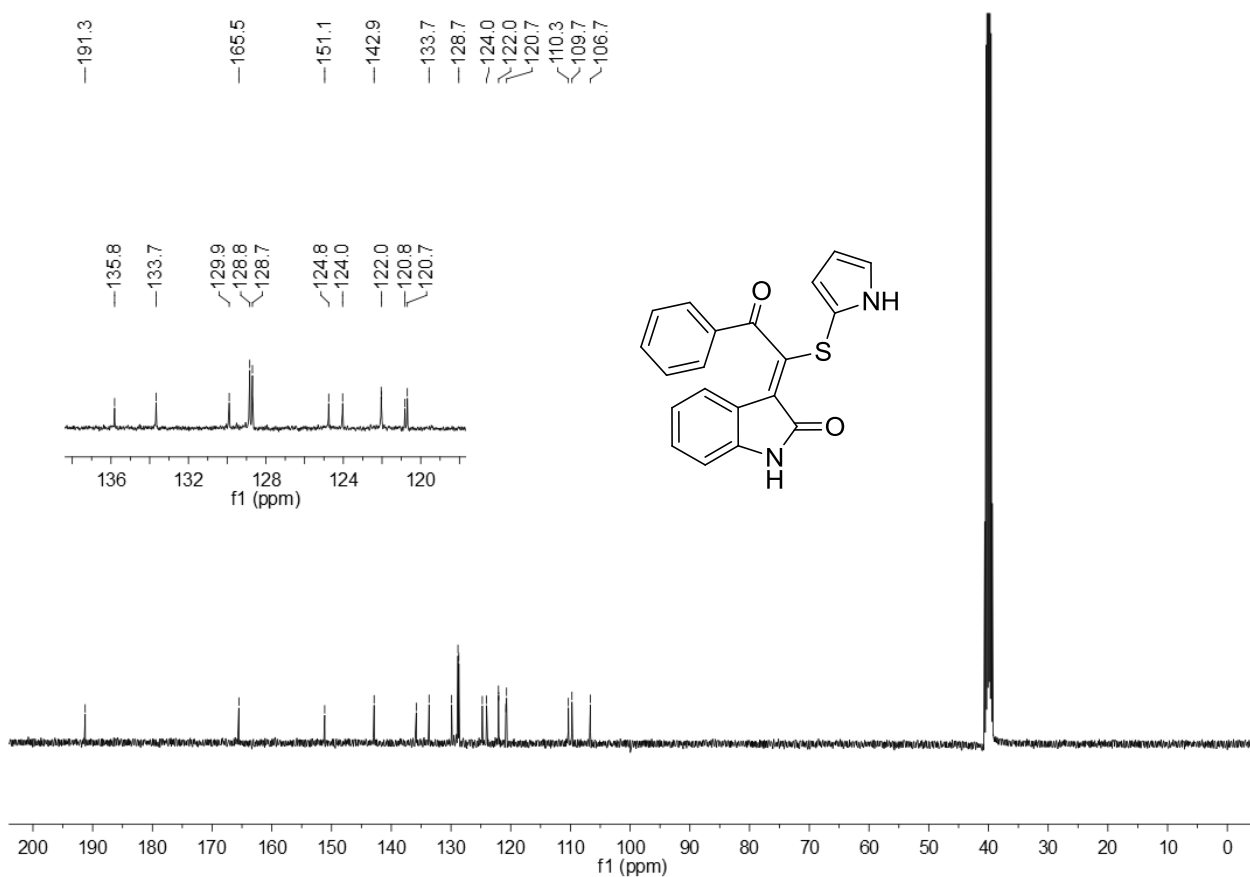

$^{13}\text{C}$  NMR Spectrum of Compound 5a

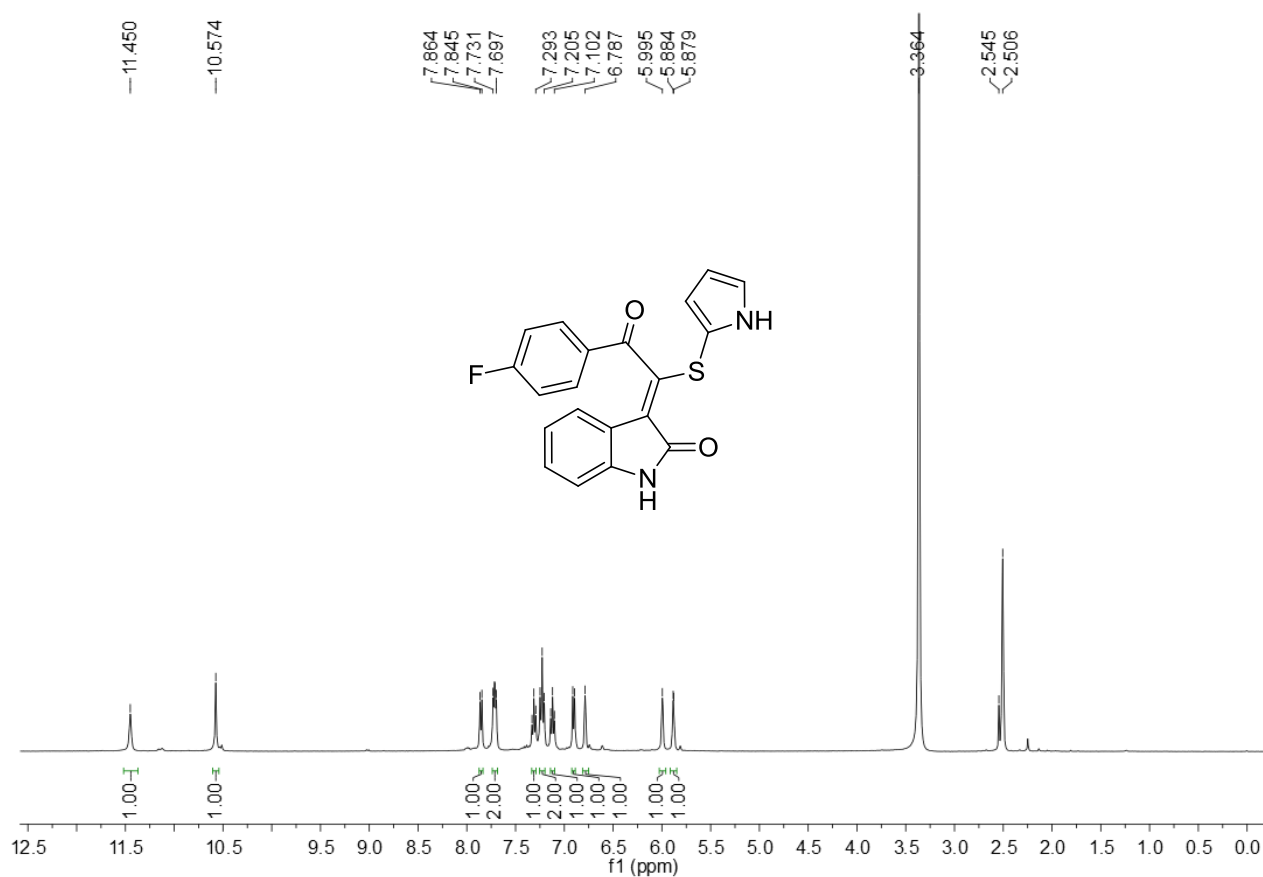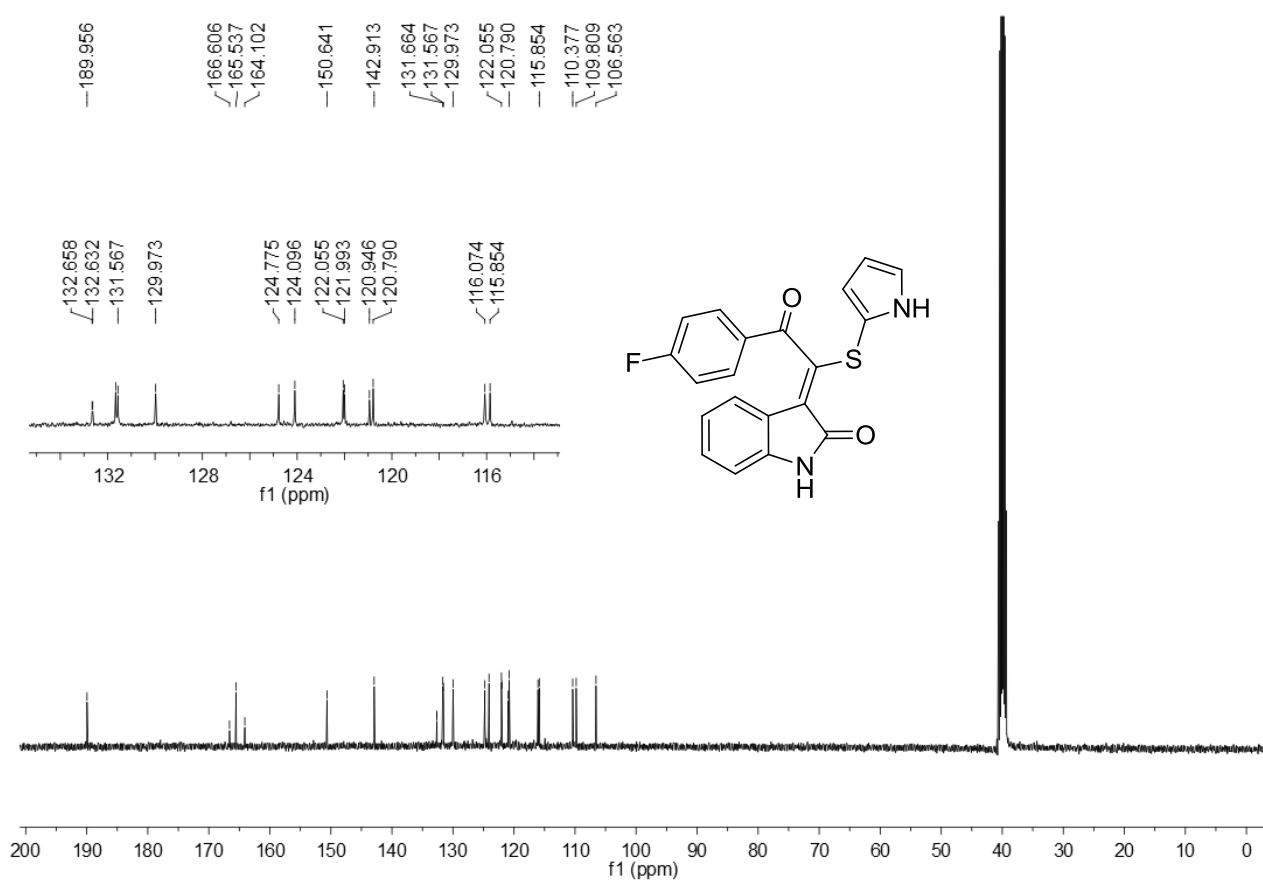



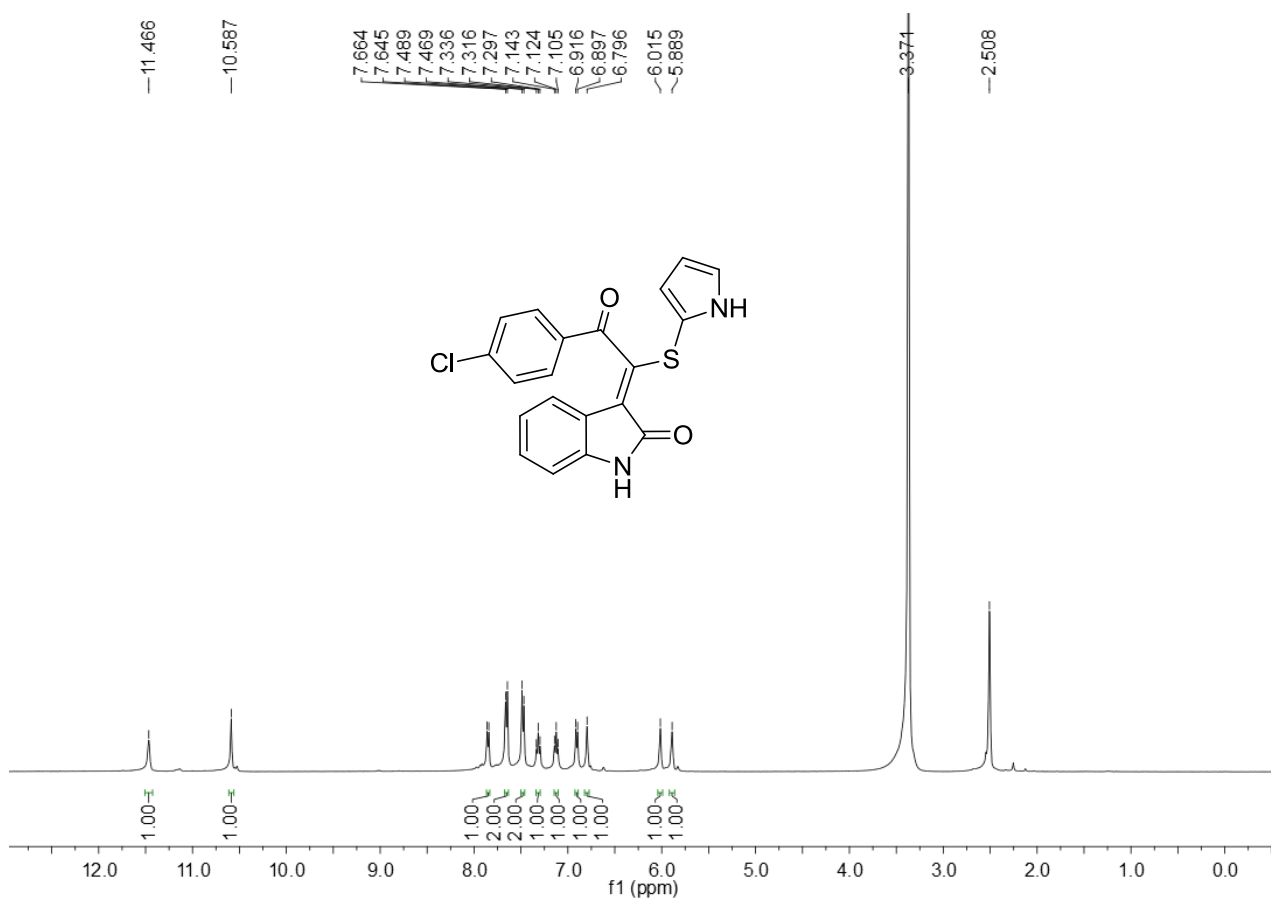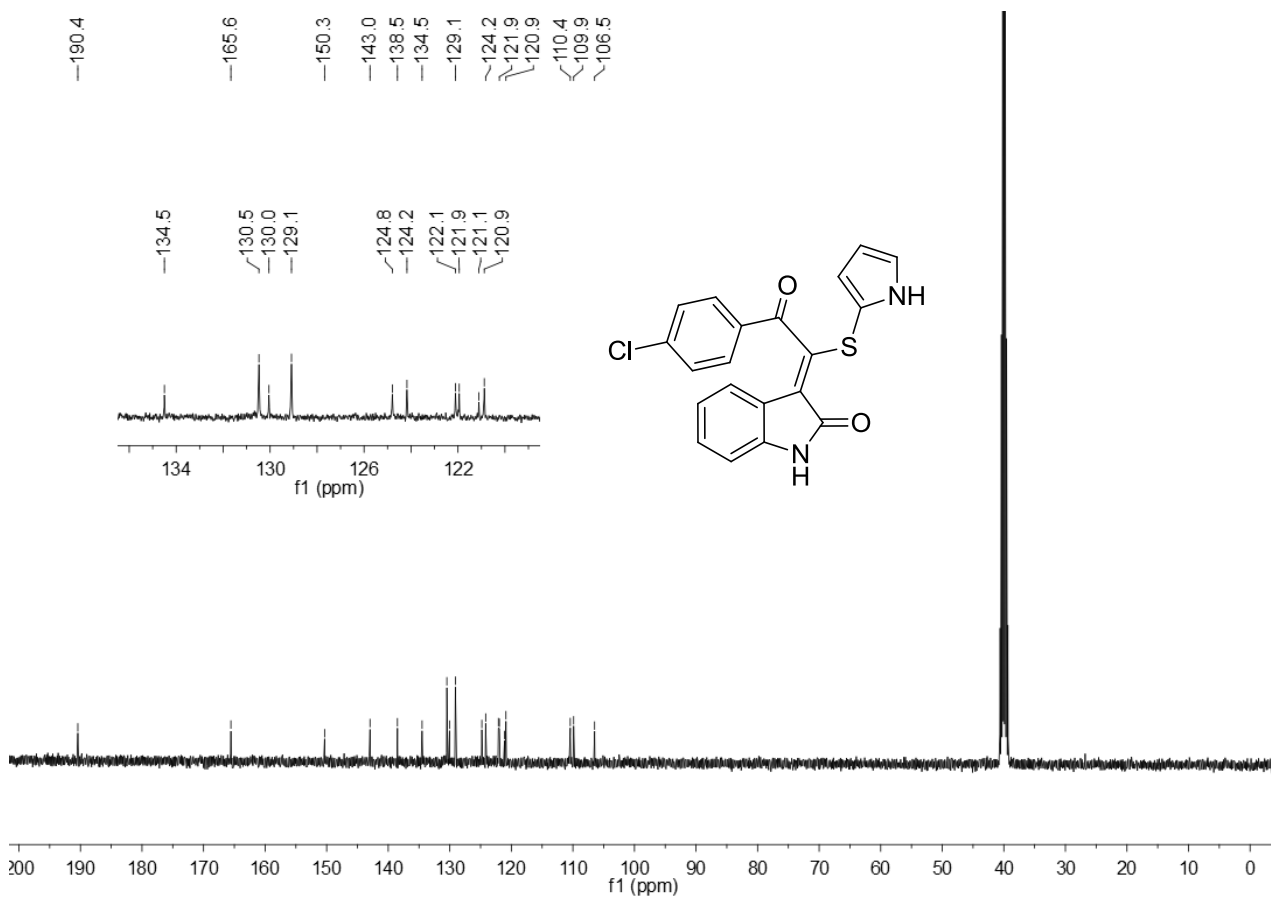

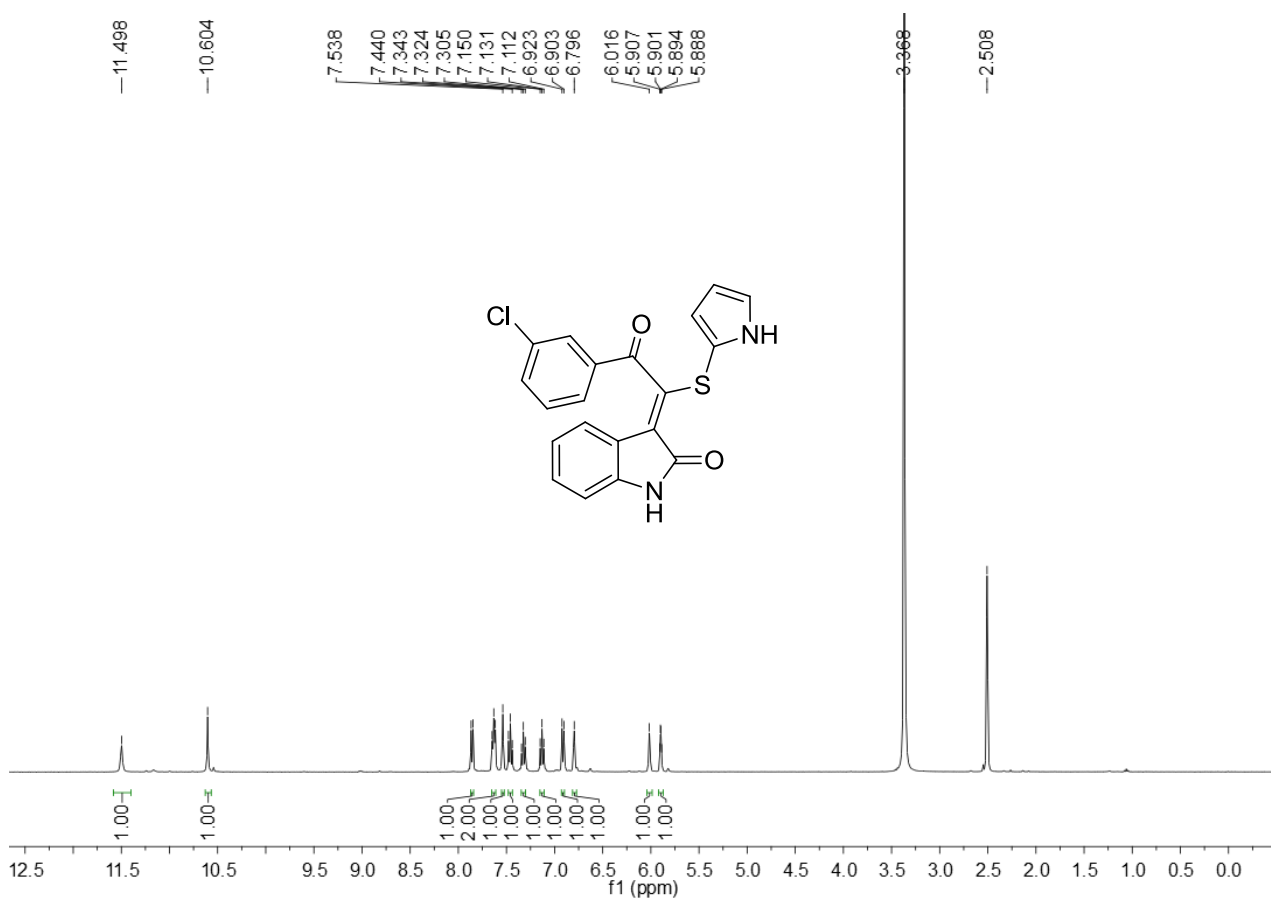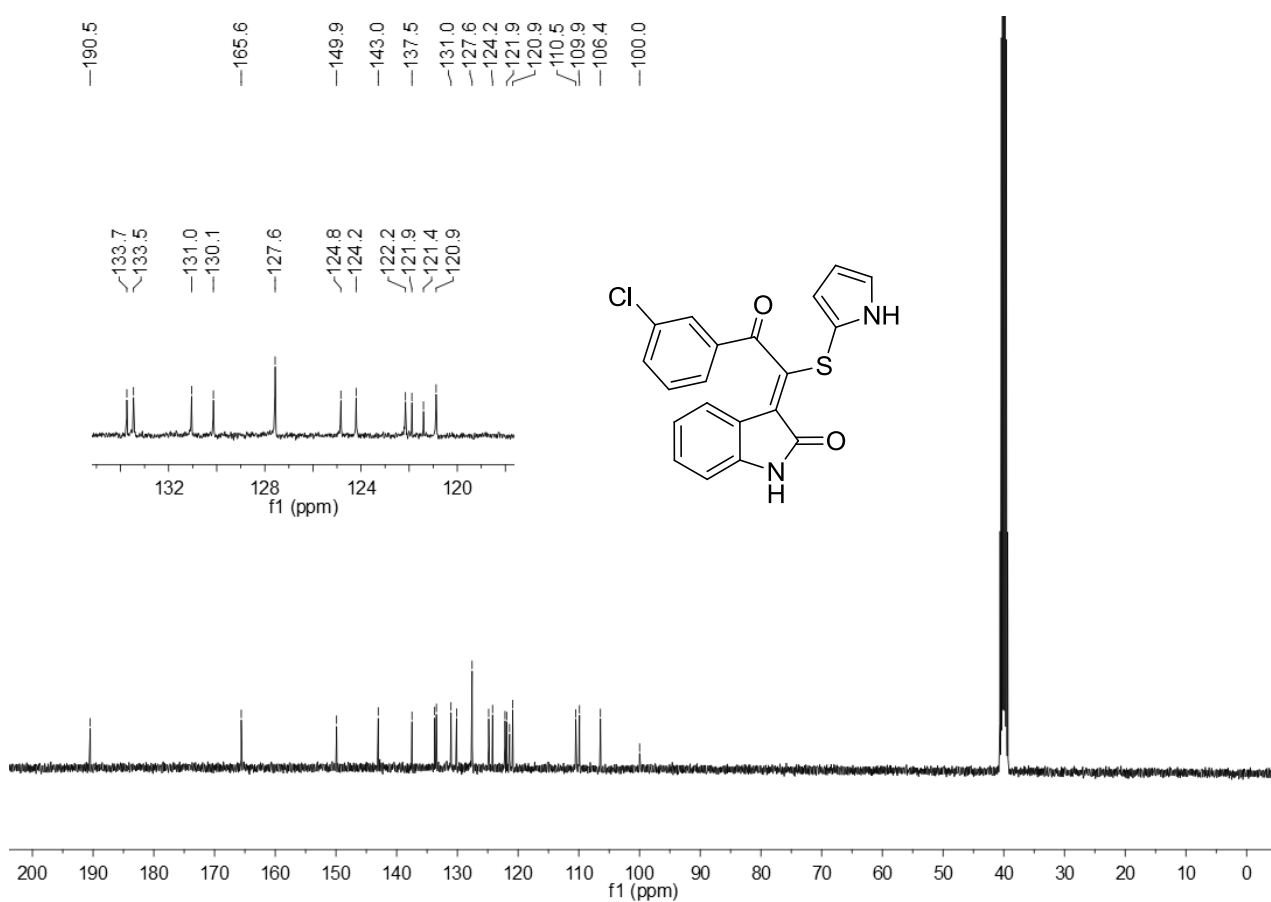

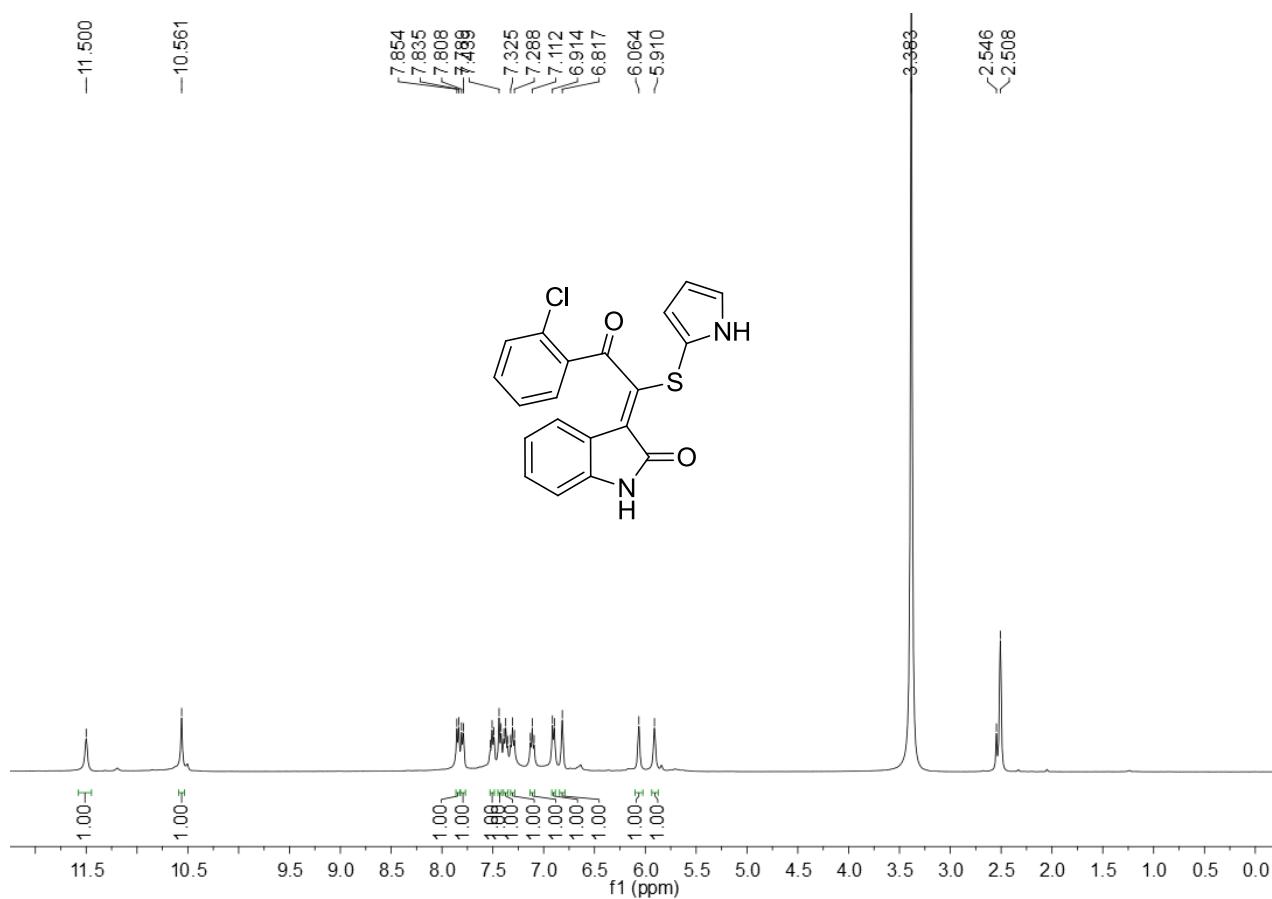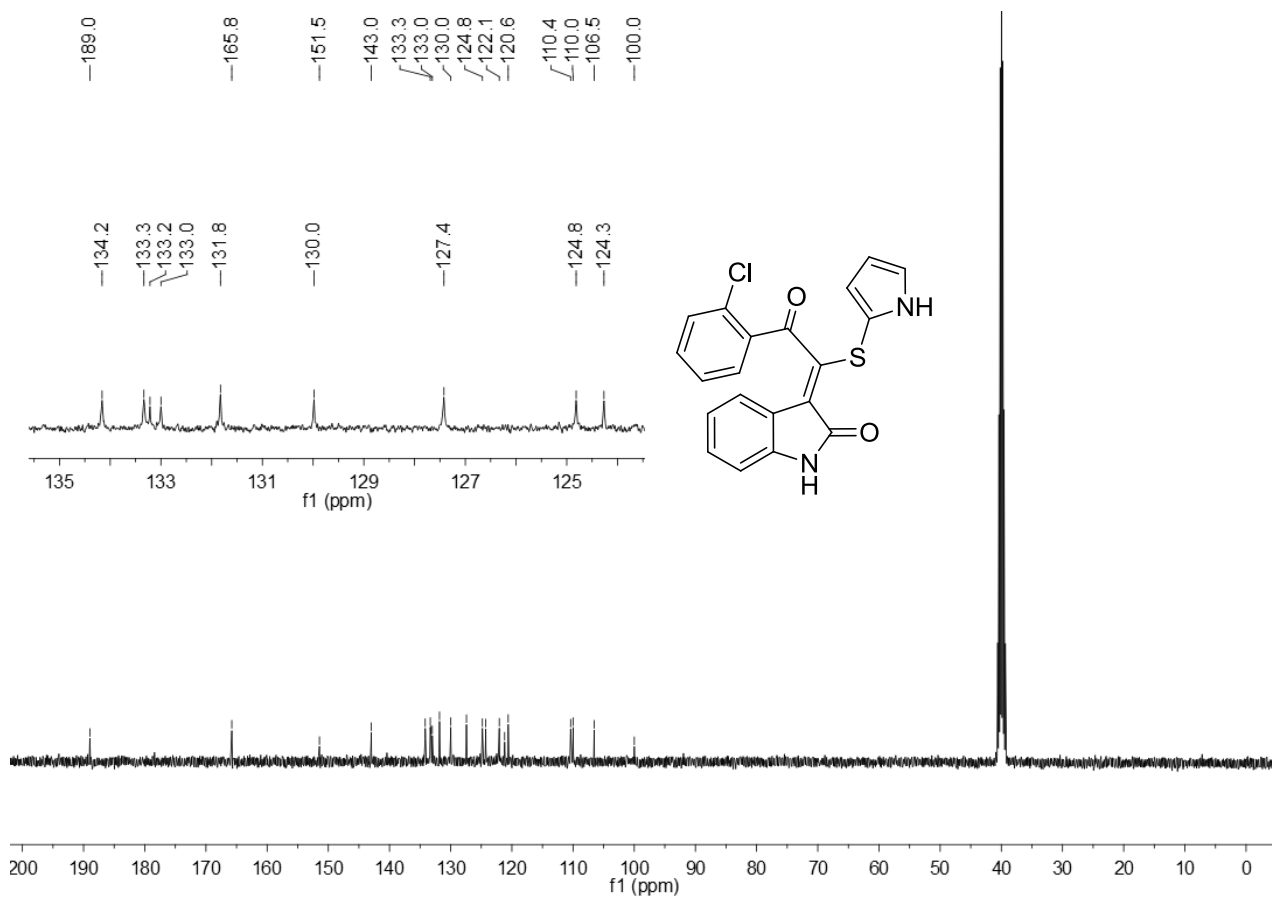

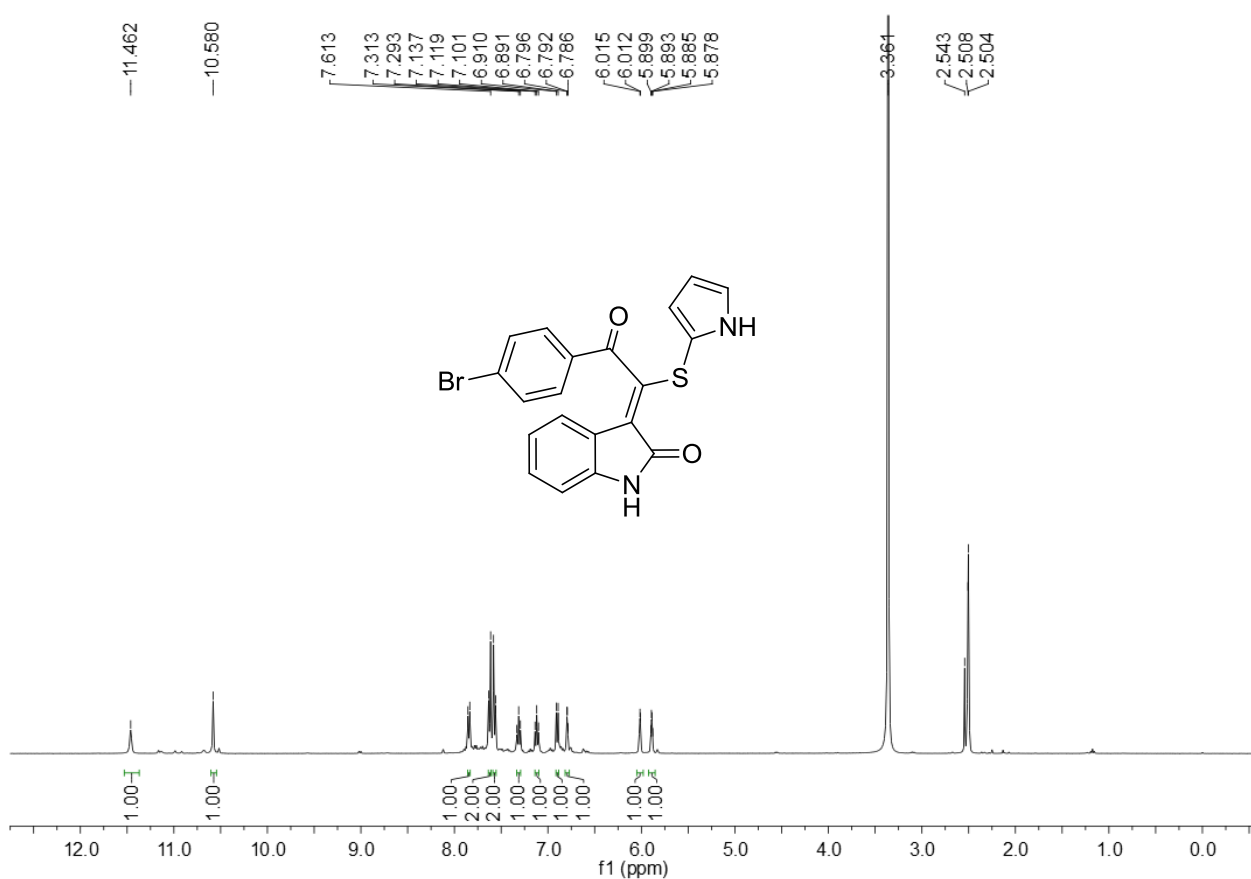

**<sup>1</sup>H NMR Spectrum of Compound 5f**

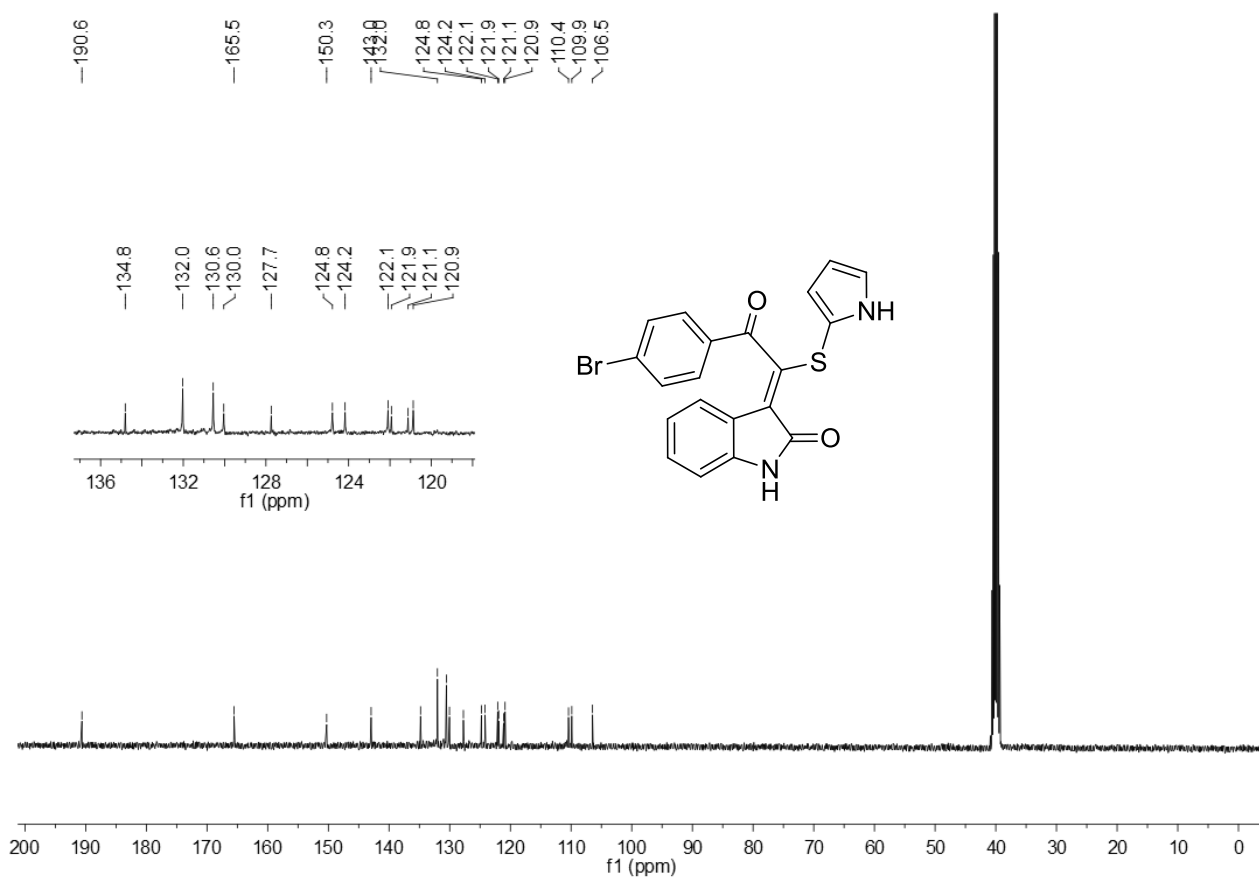

**<sup>13</sup>C NMR Spectrum of Compound 5f**

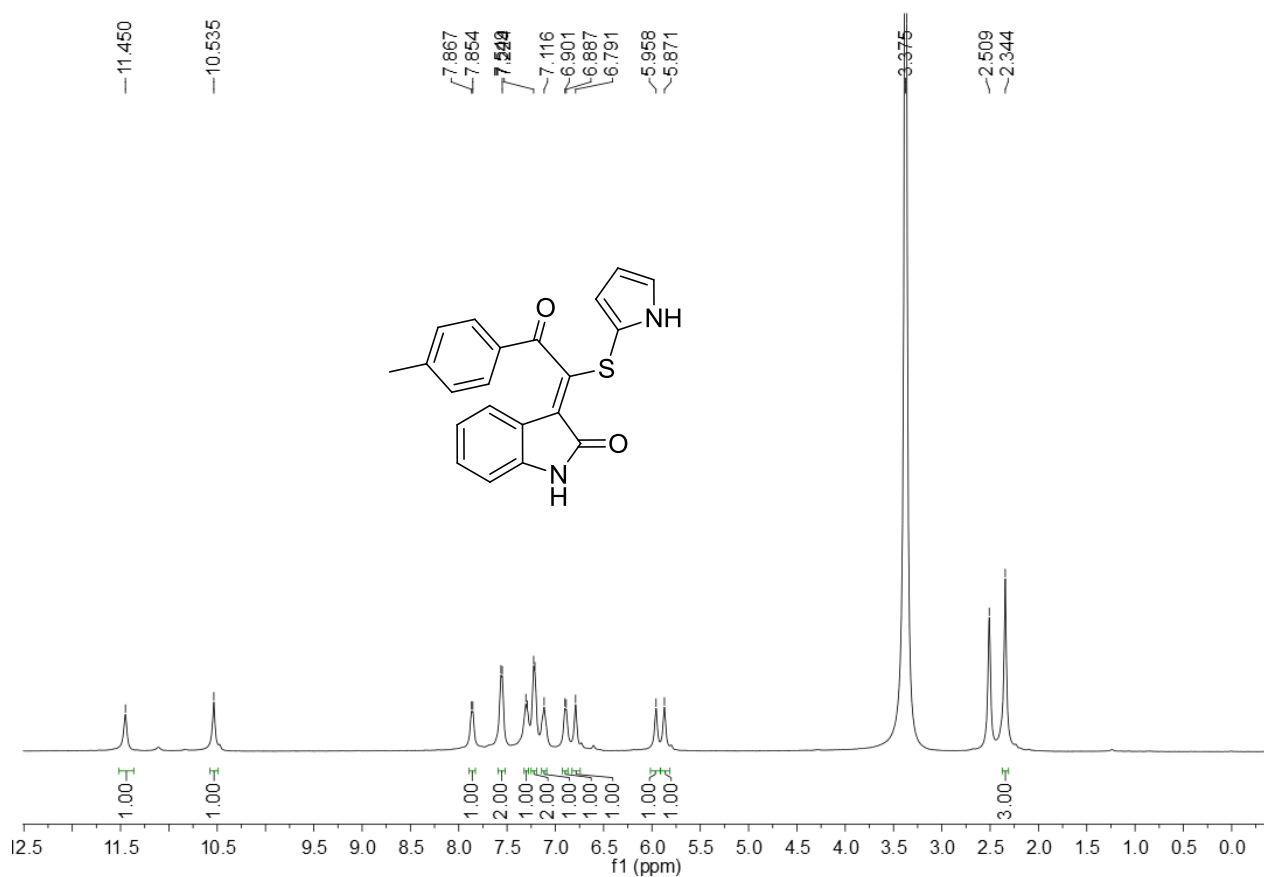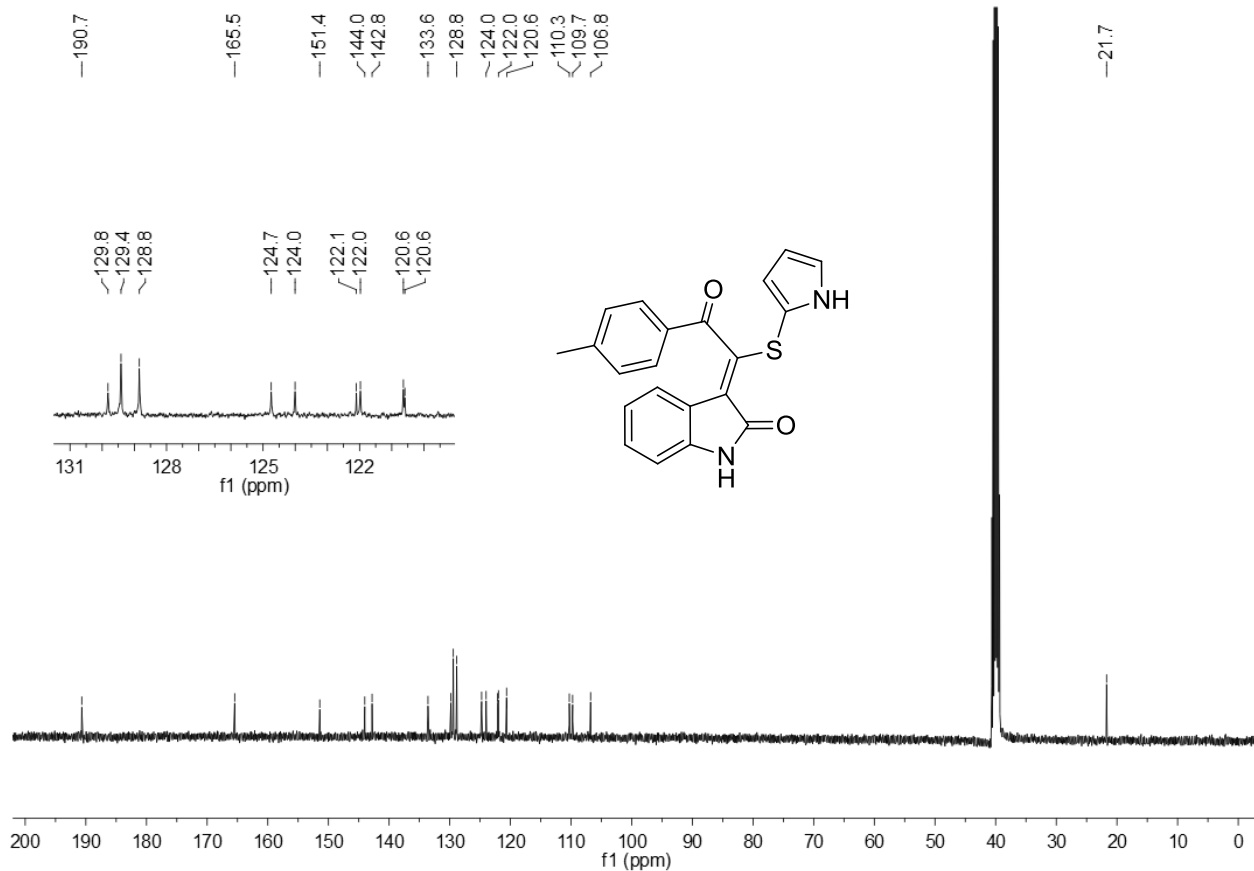

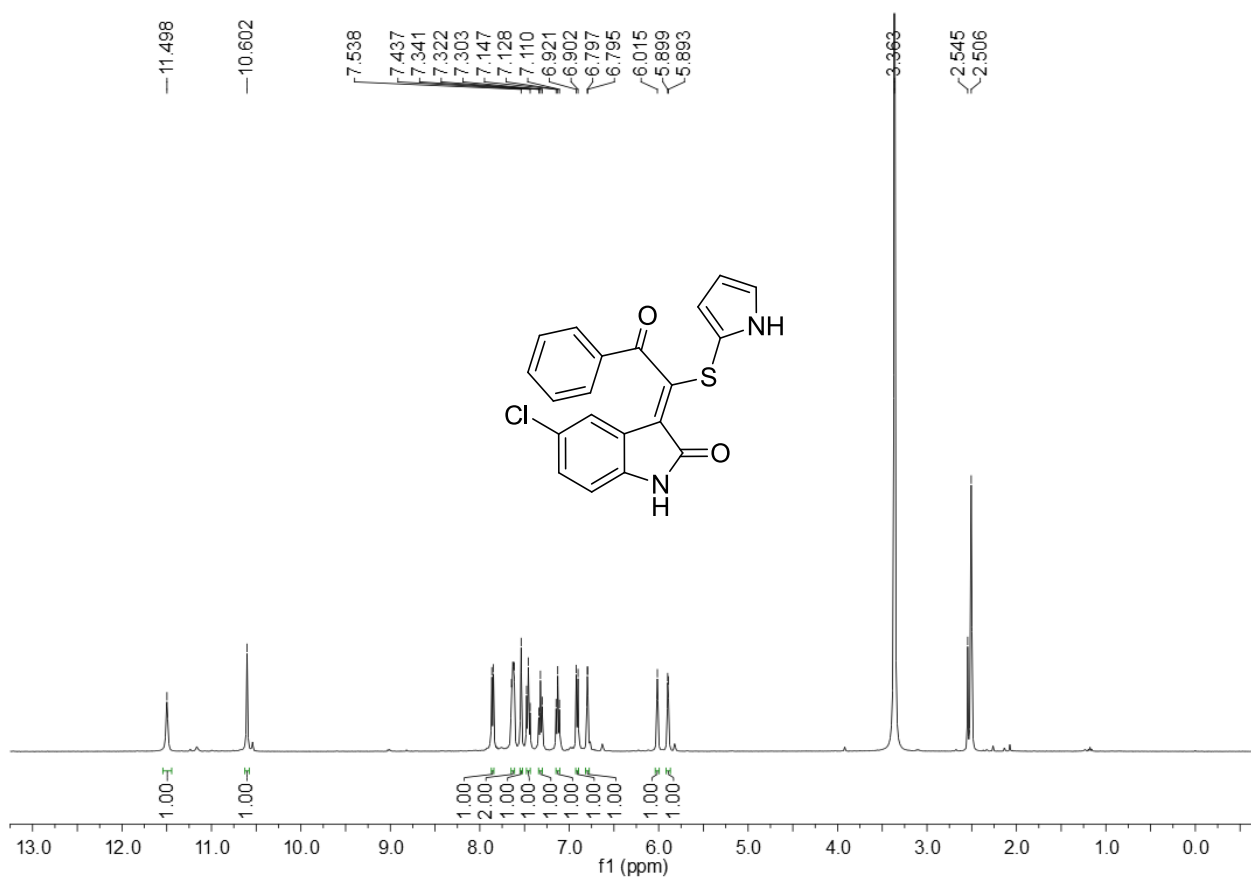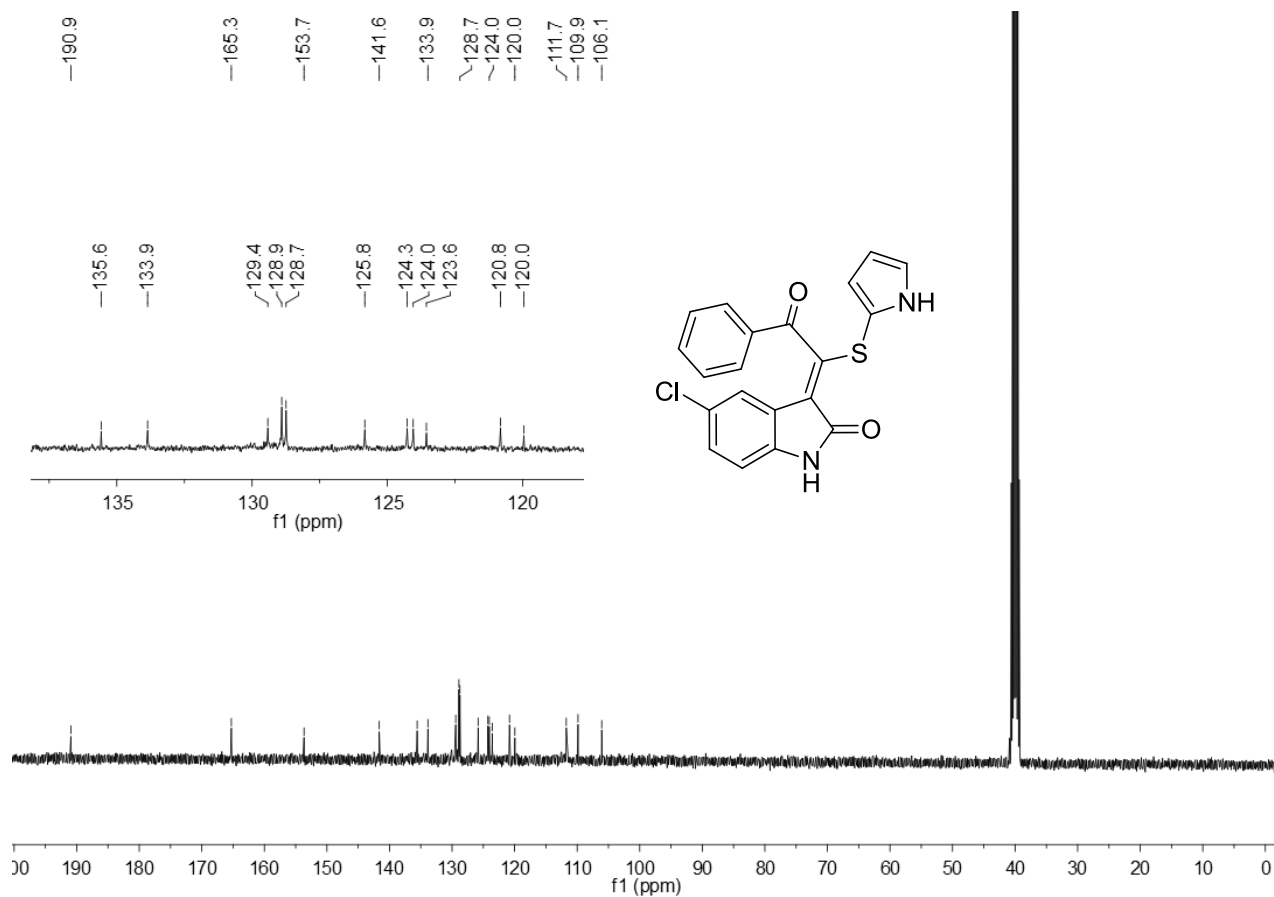

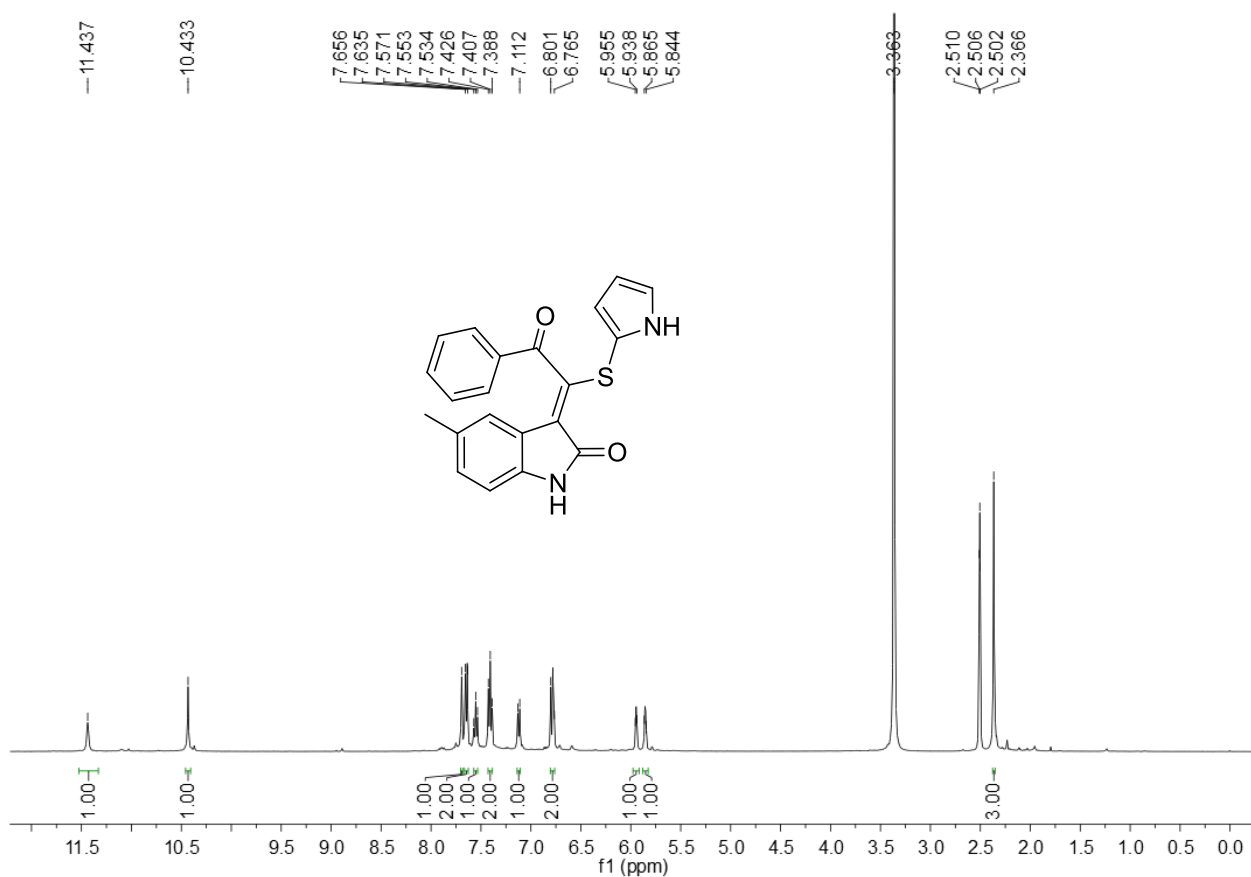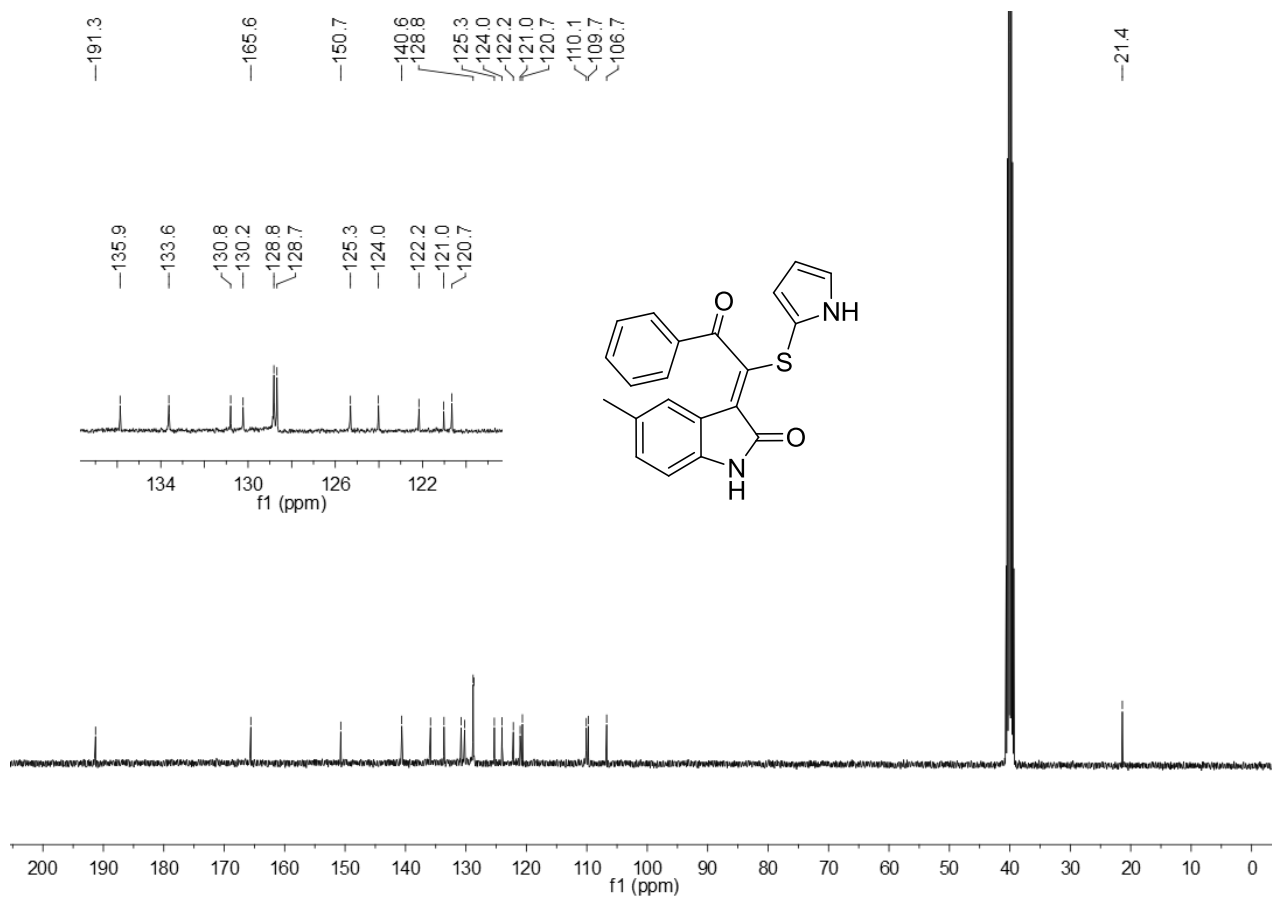

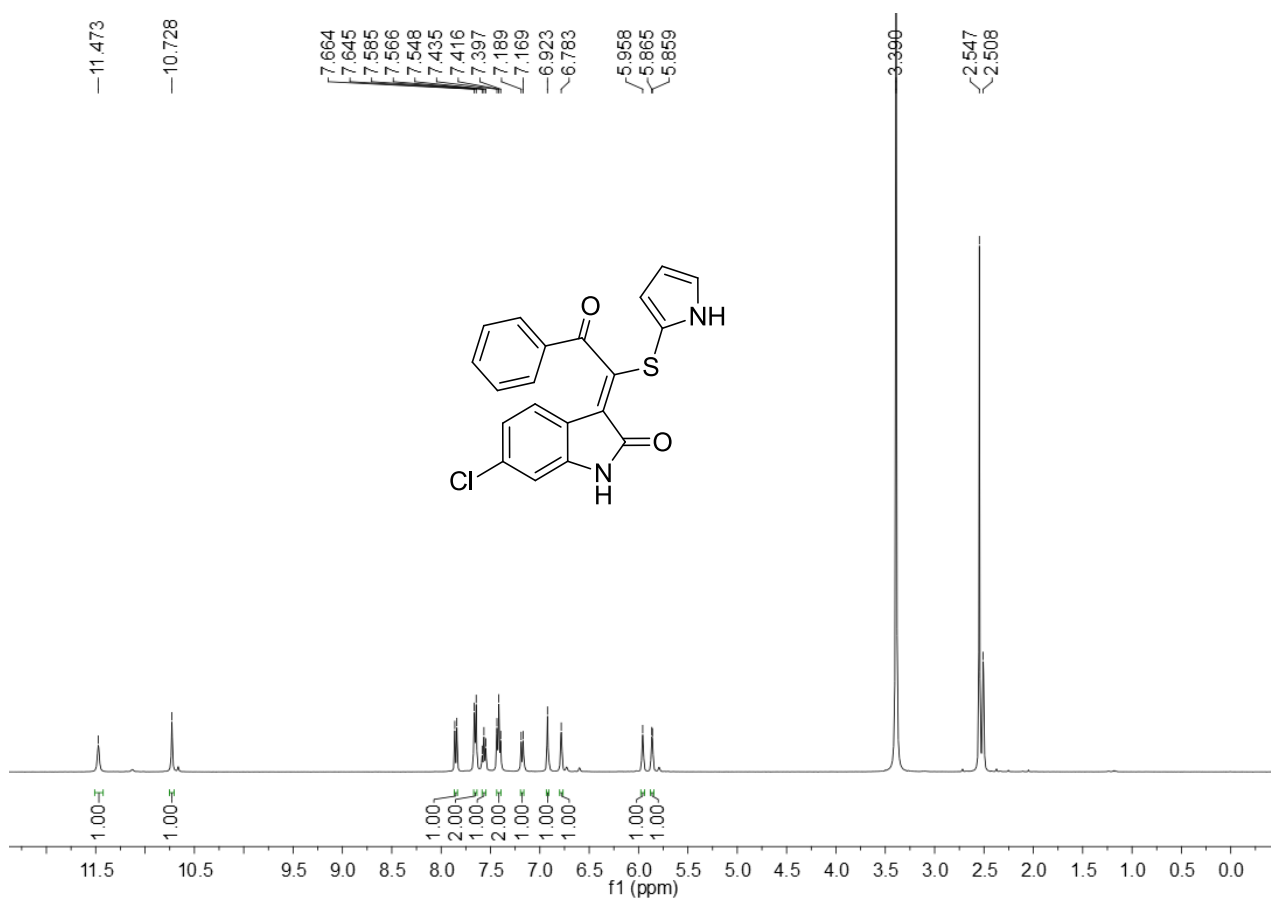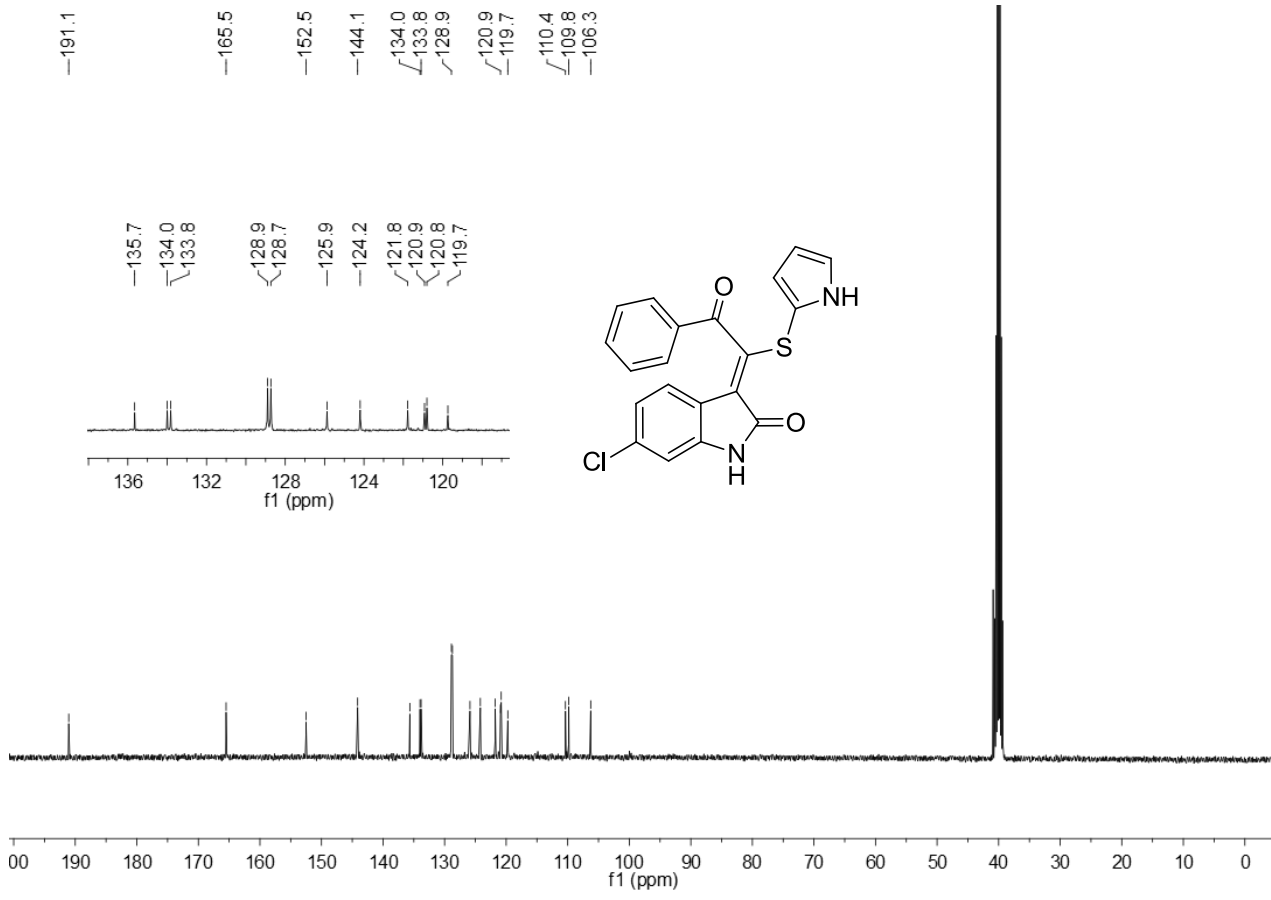



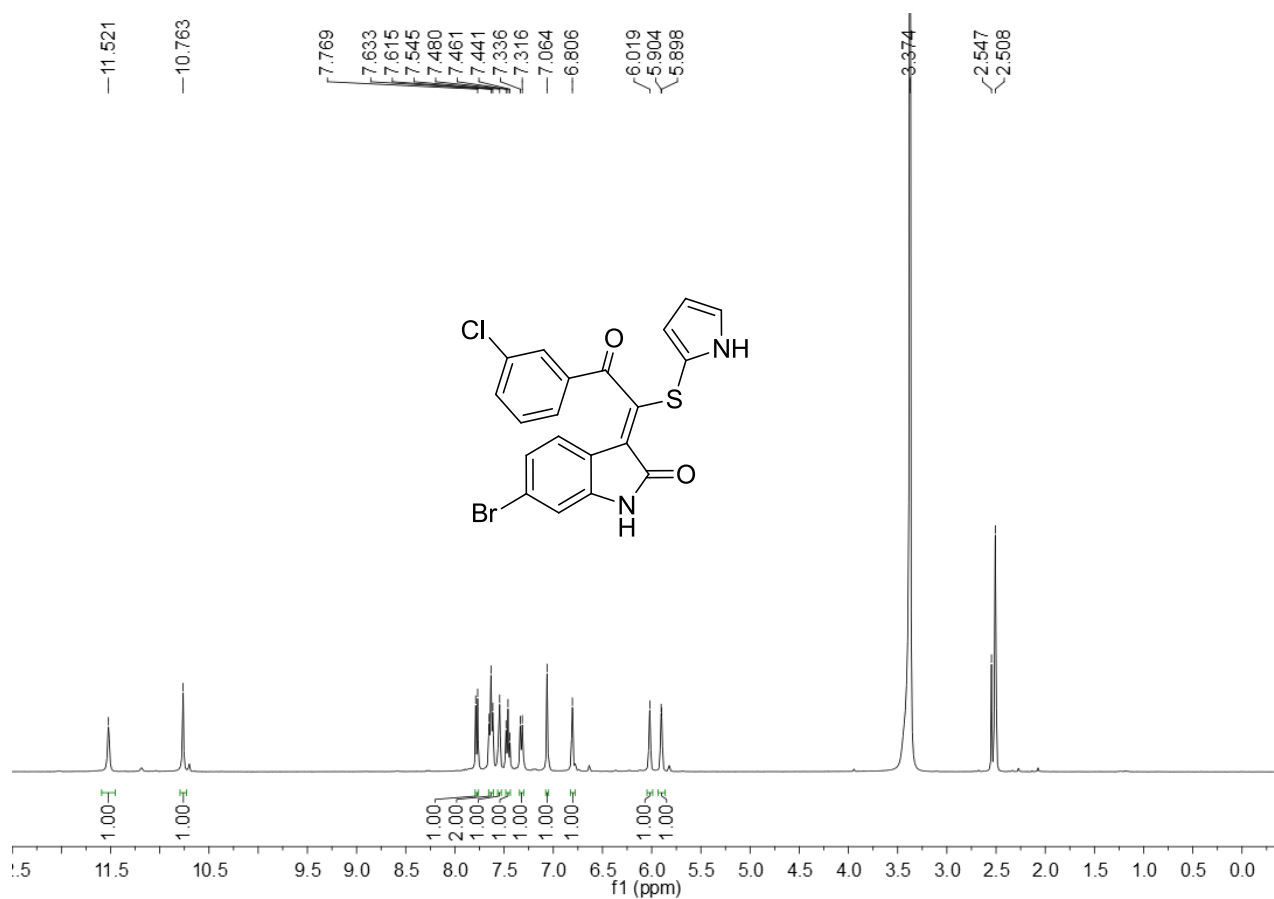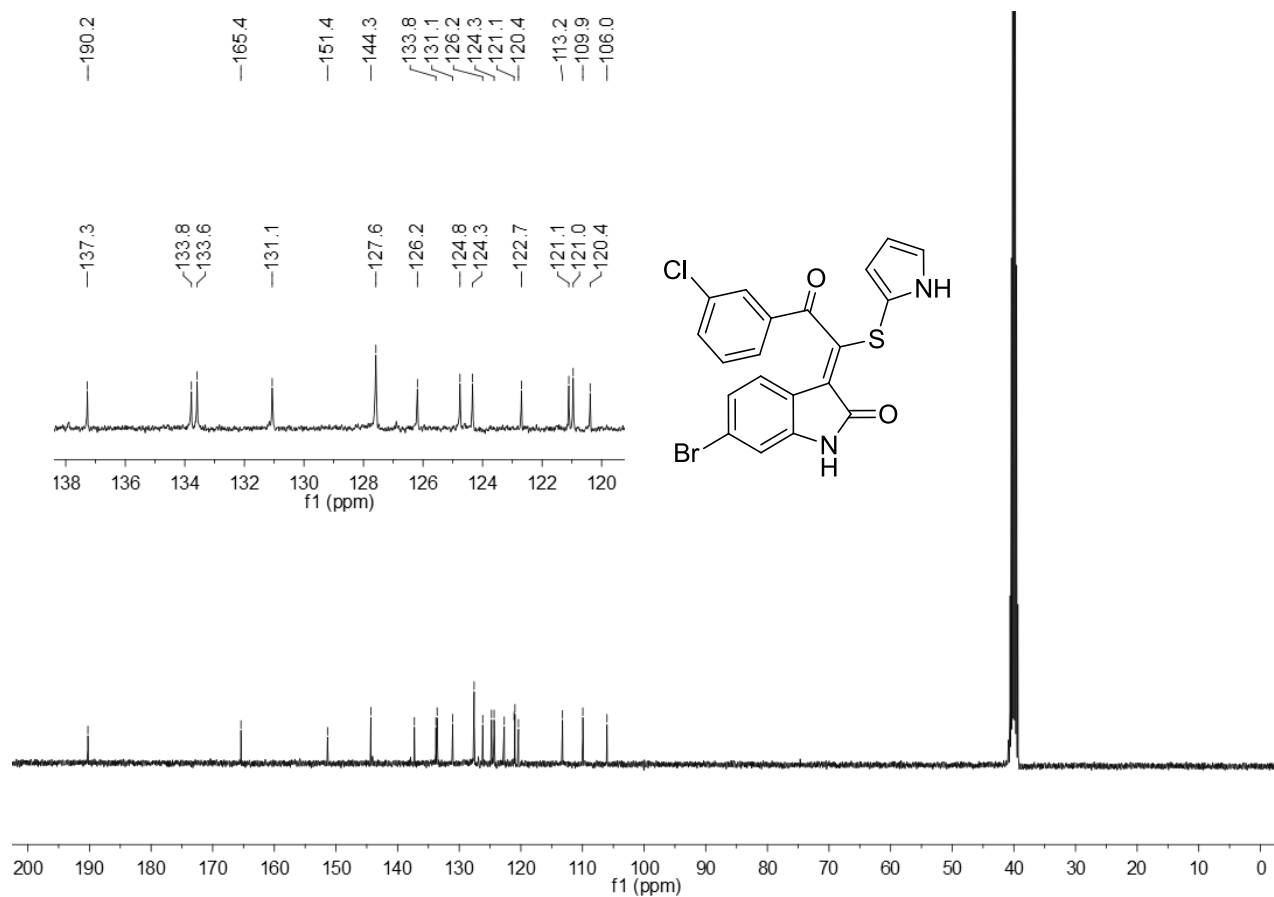

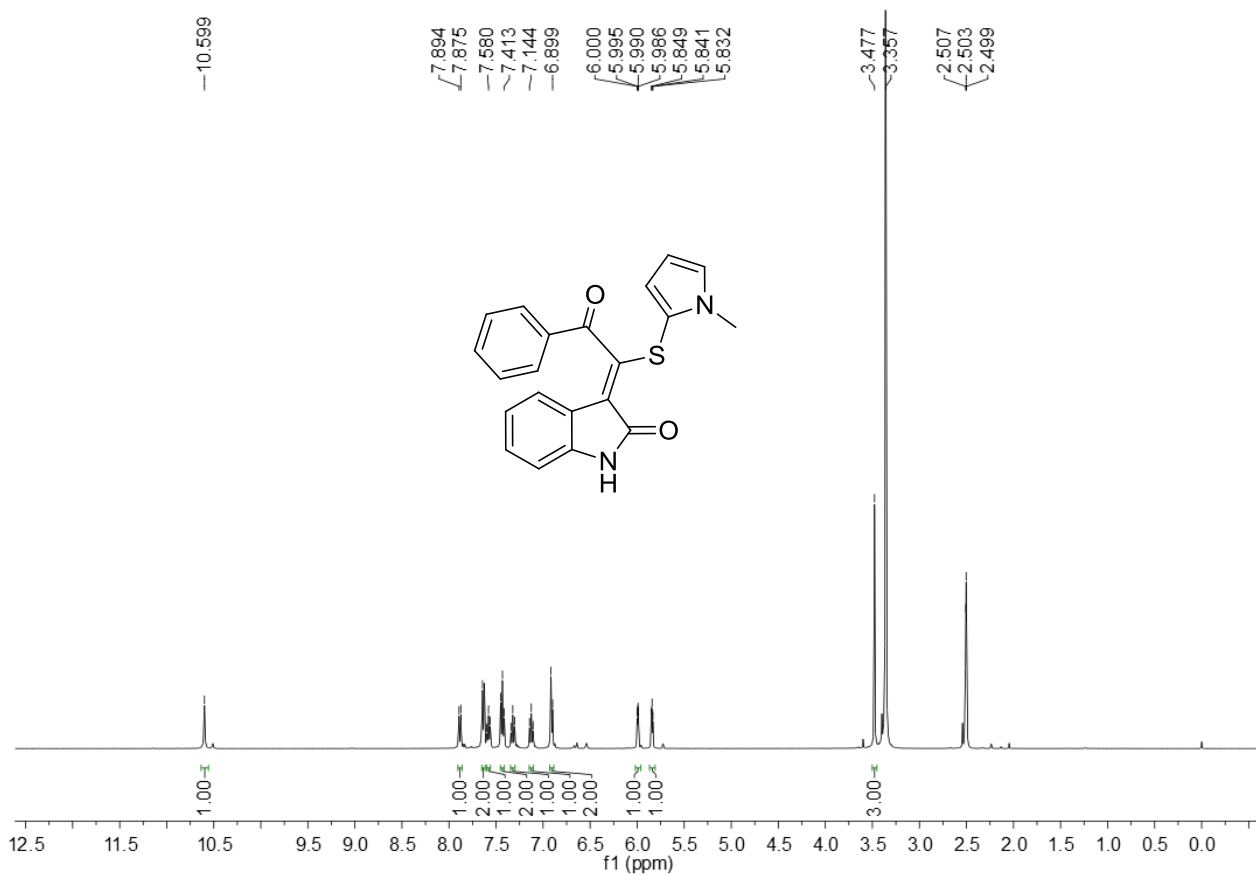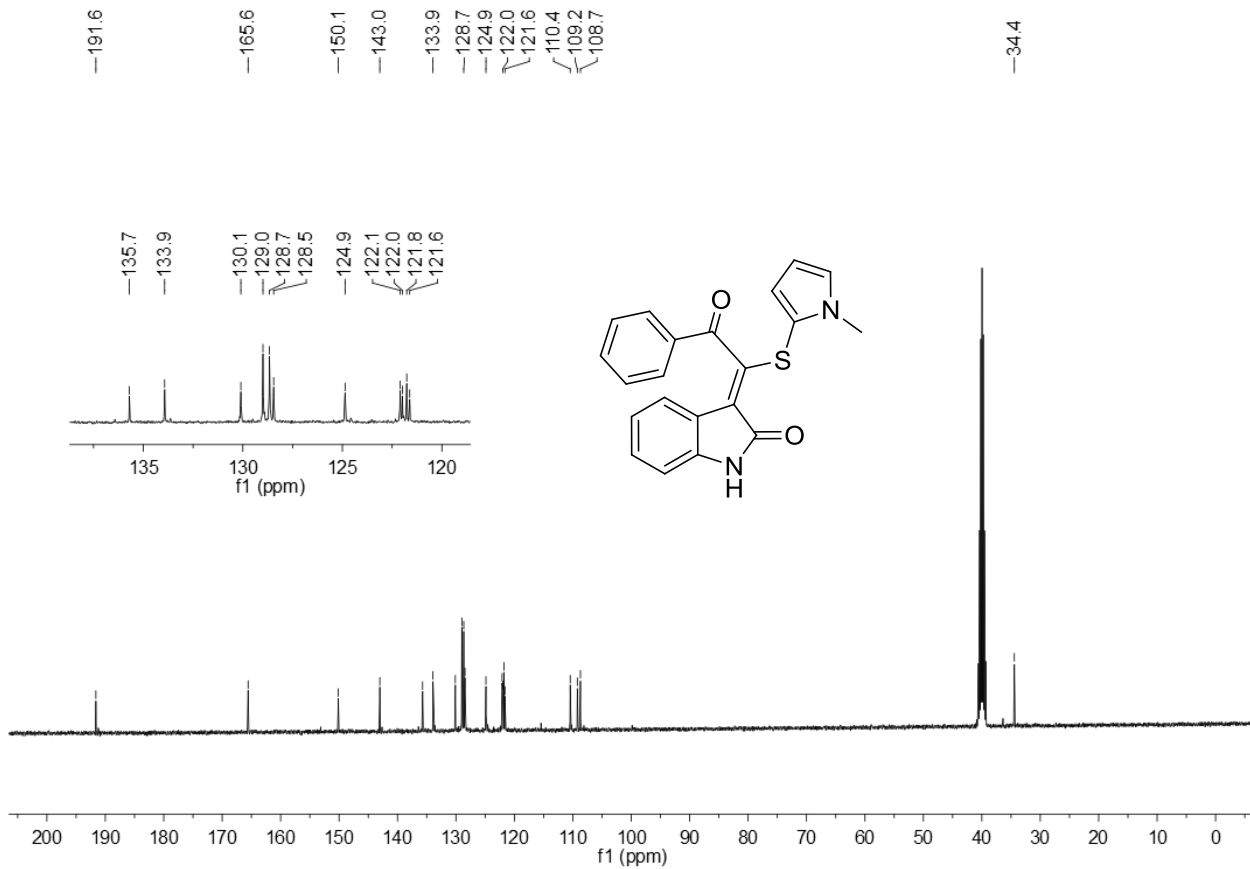

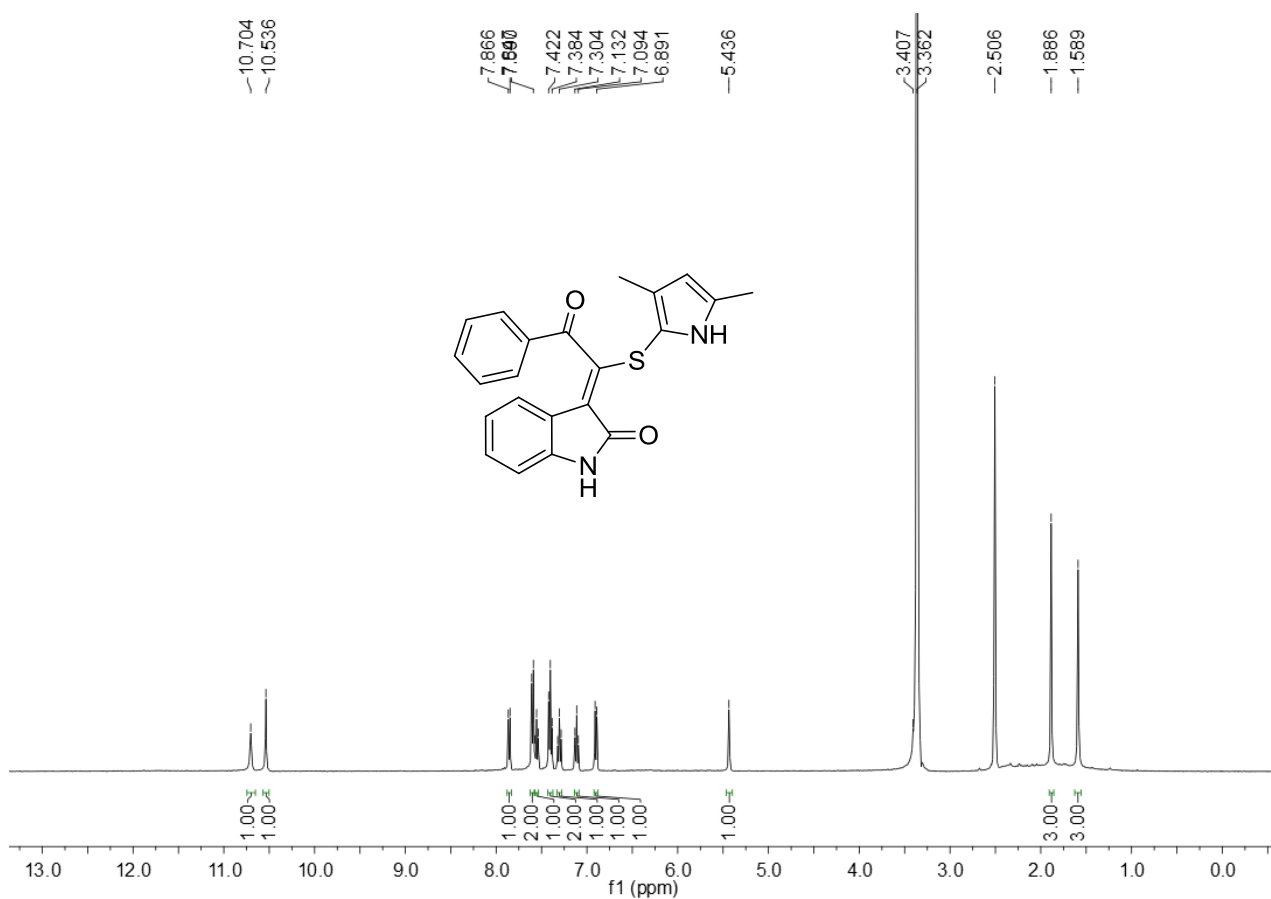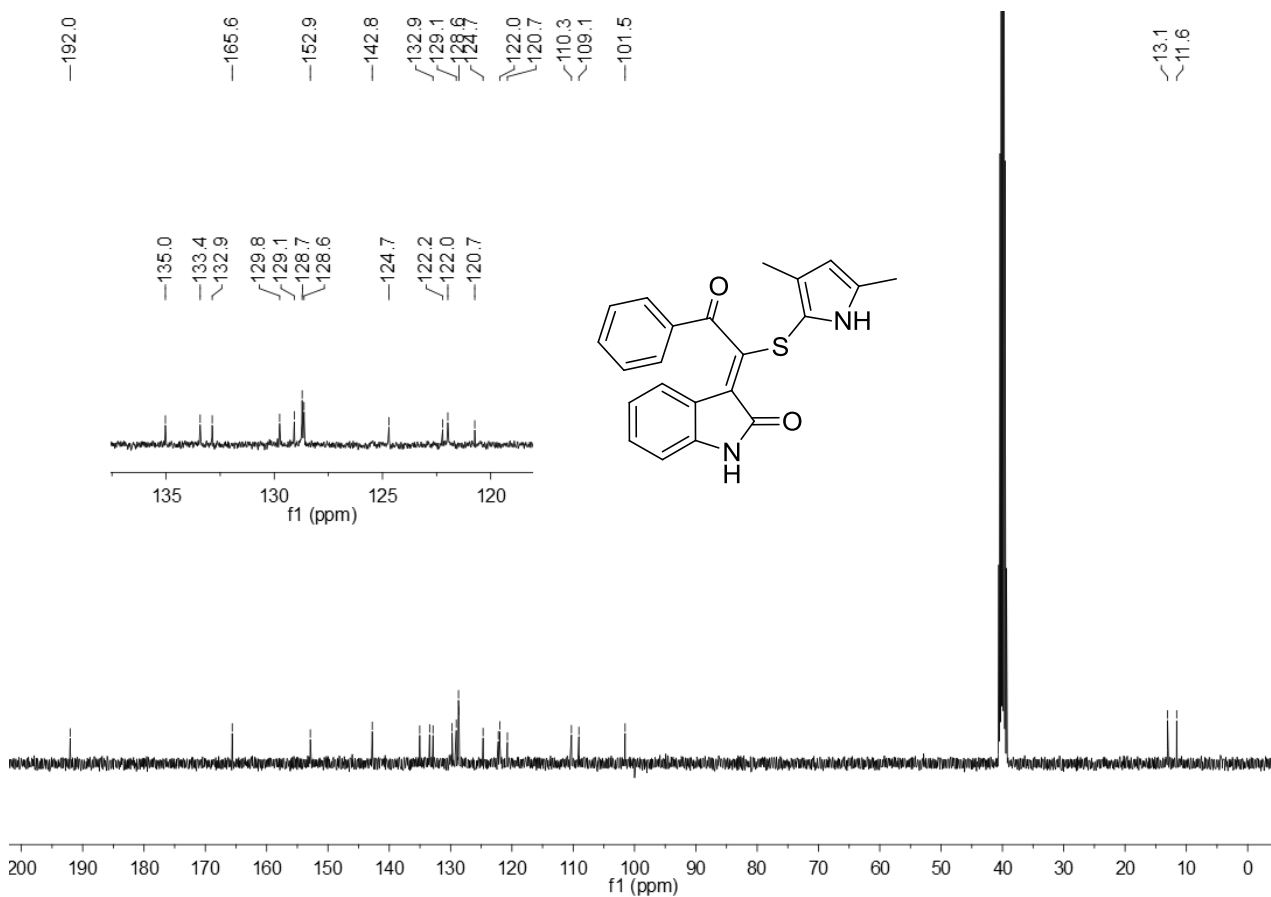

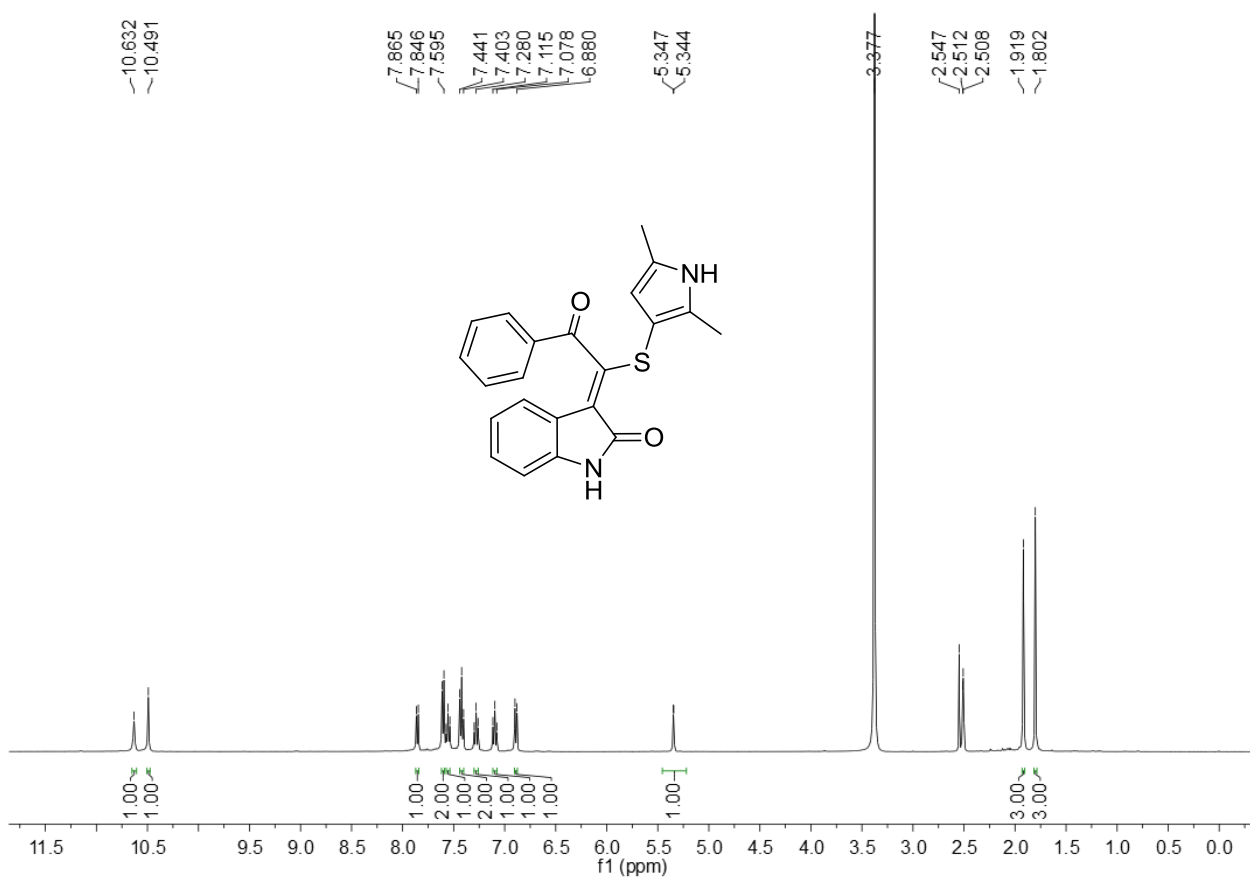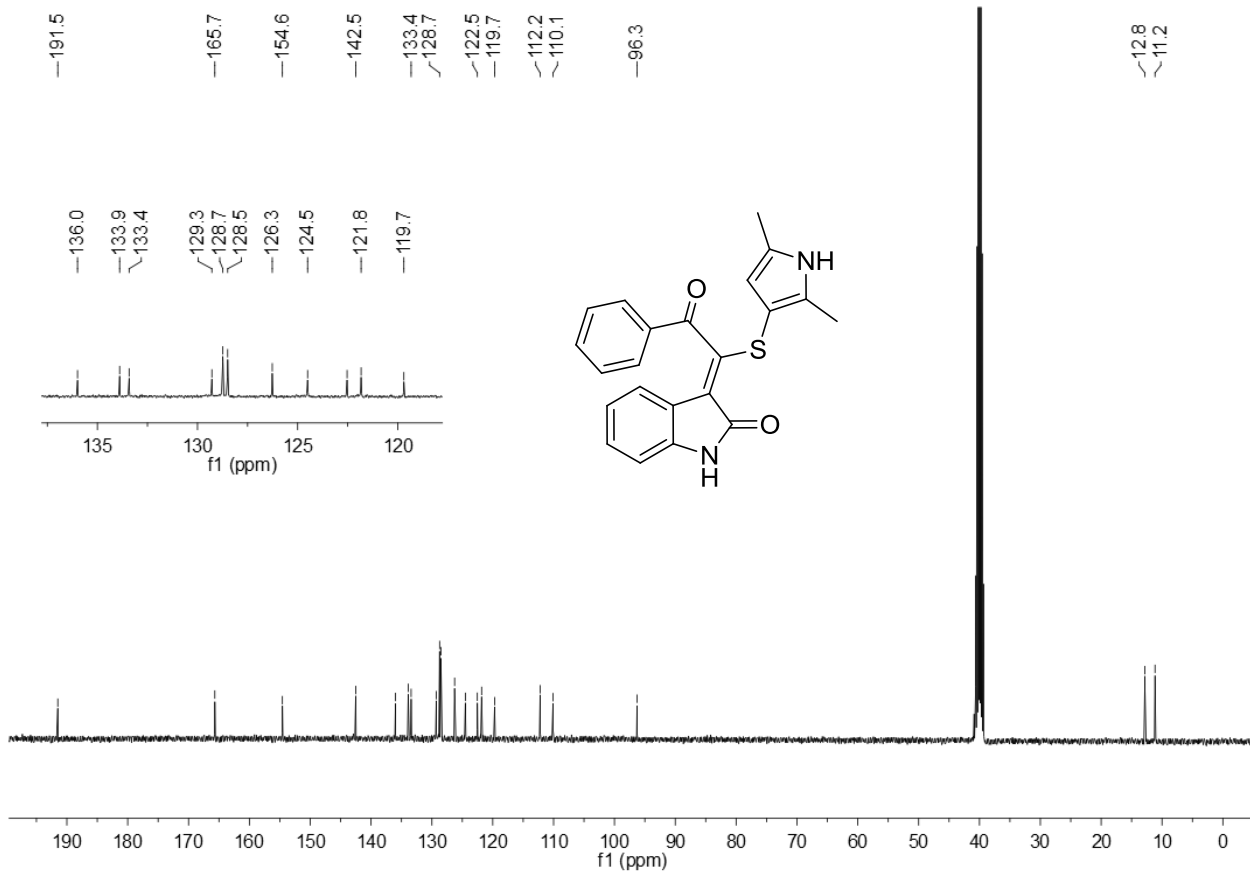

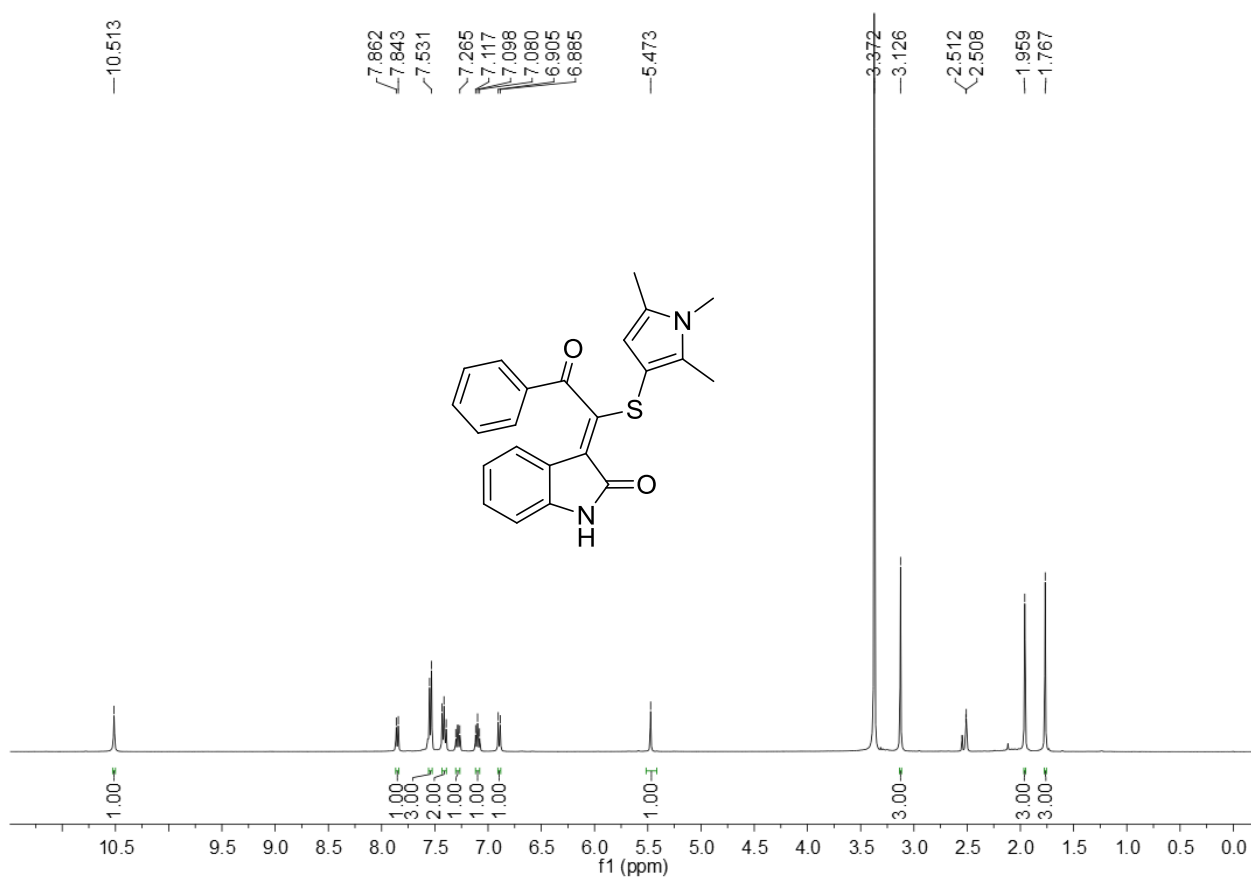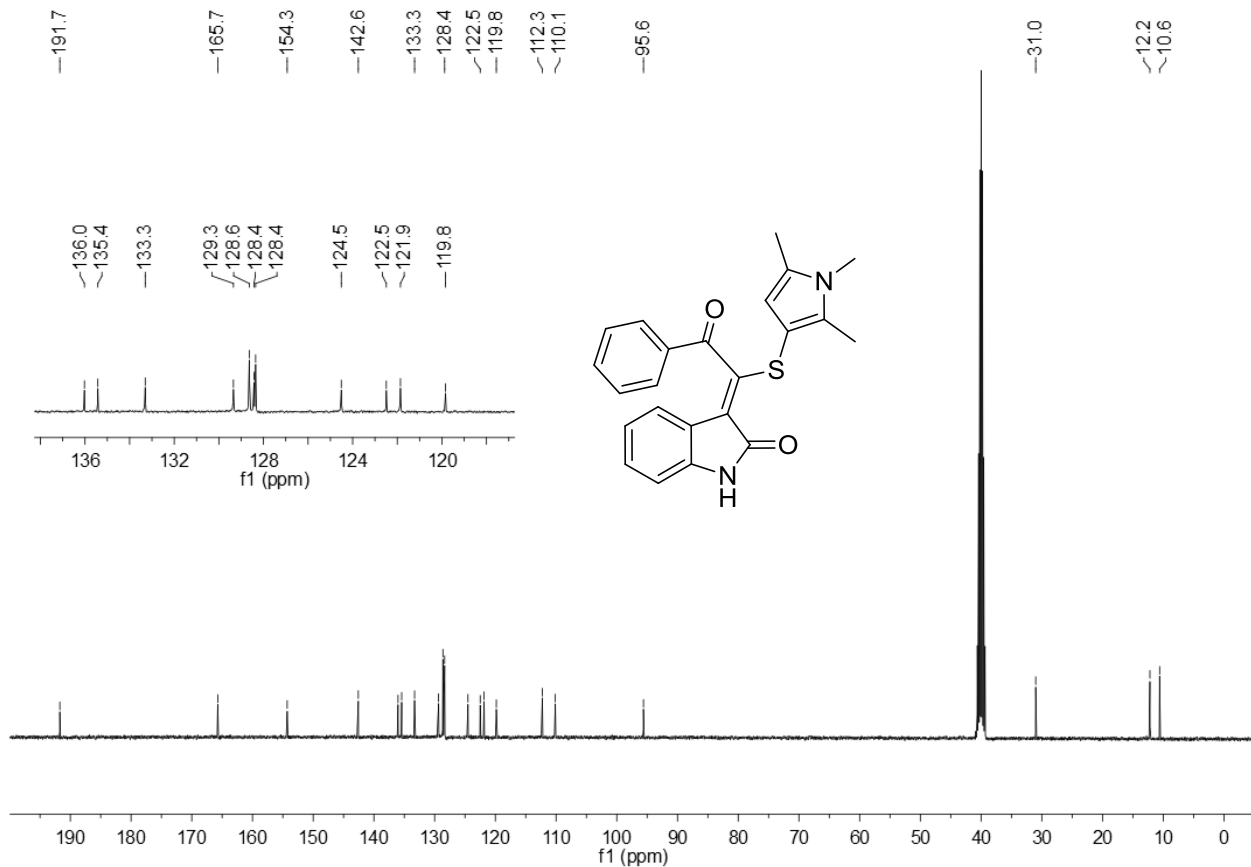

—11.596

8.366  
8.096  
7.915  
7.798  
7.622  
7.604  
7.488  
7.468  
7.451  
7.399  
7.373  
7.321  
7.303  
7.287  
7.100  
7.082  
7.063  
6.994  
6.976  
6.958

—3.338

2.506

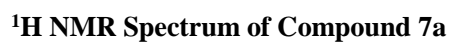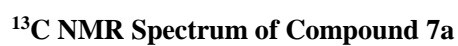

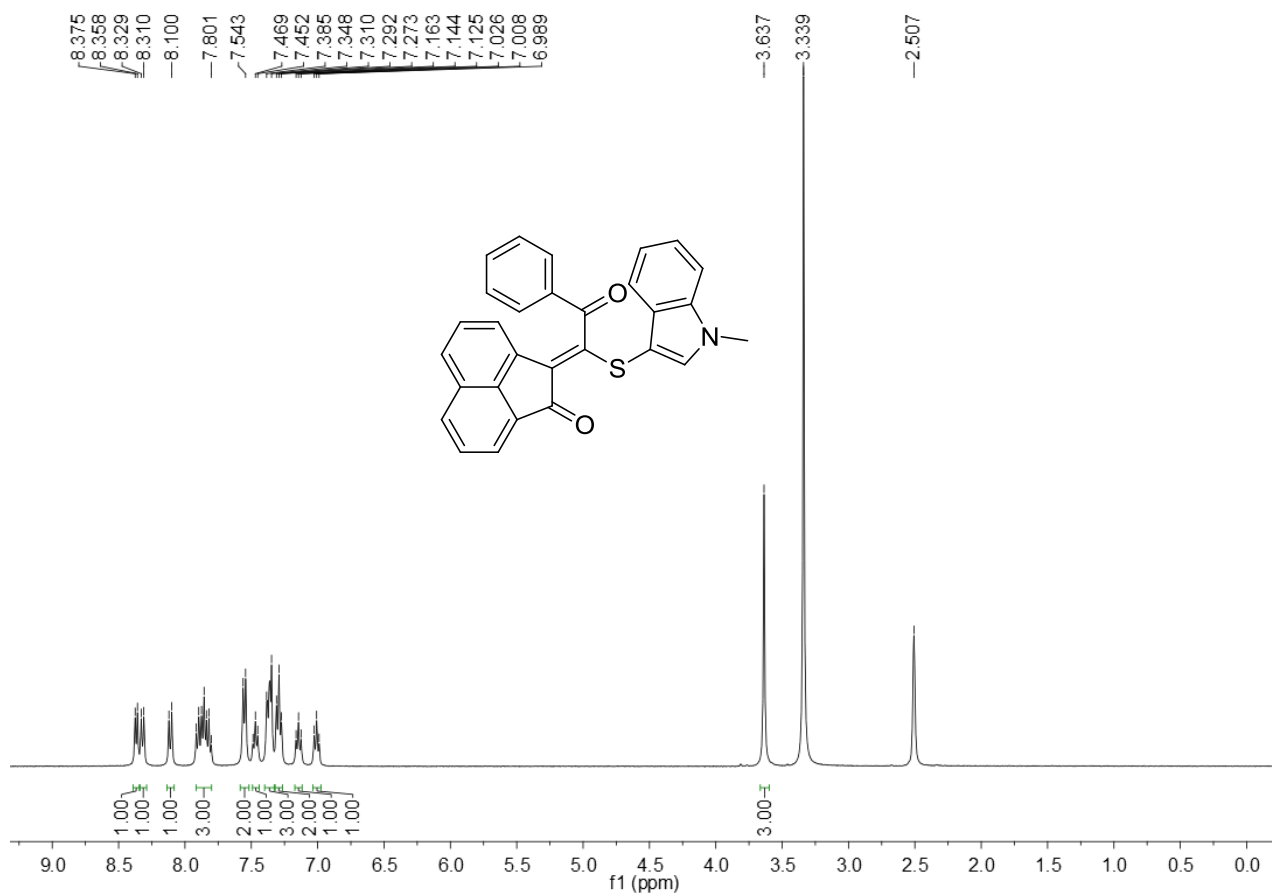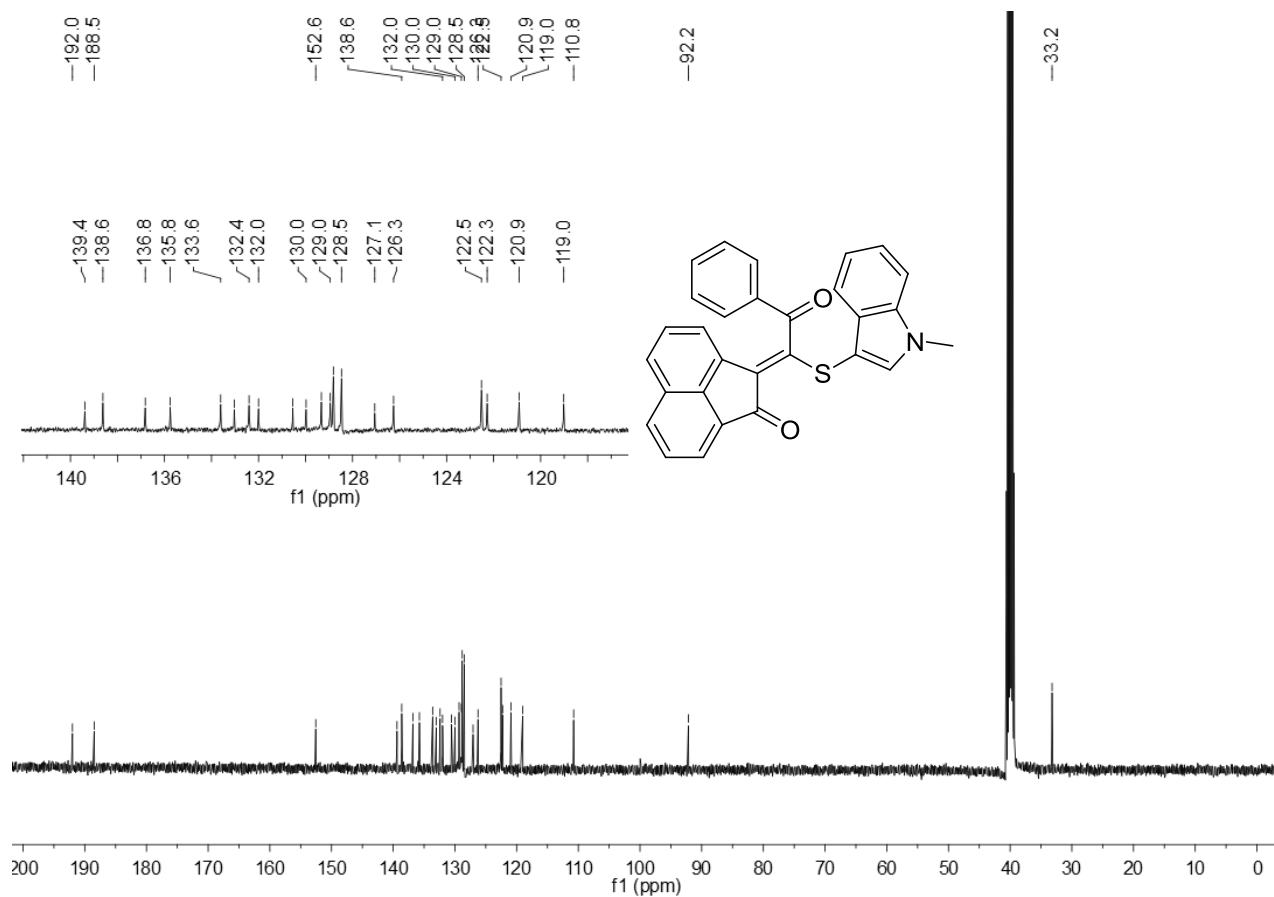

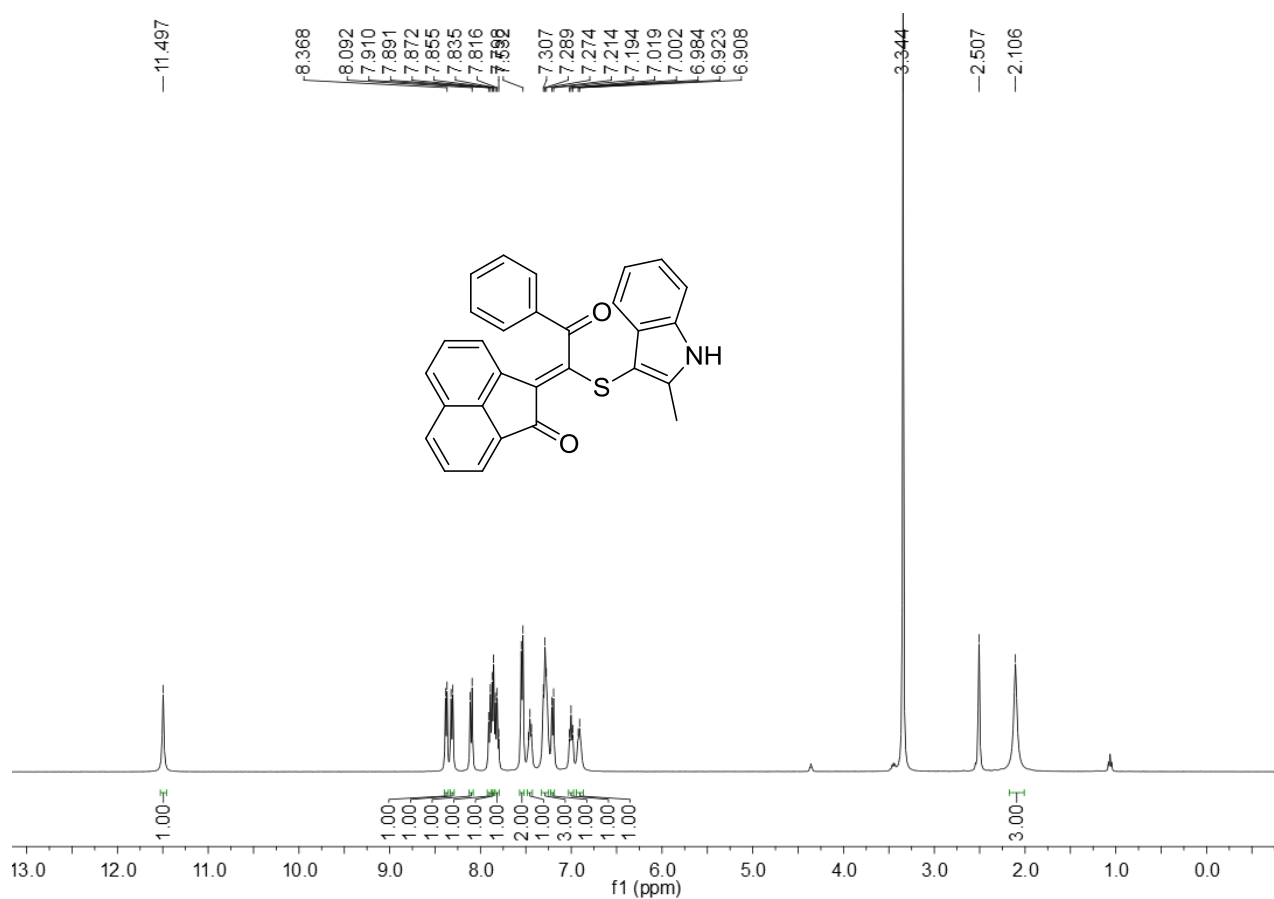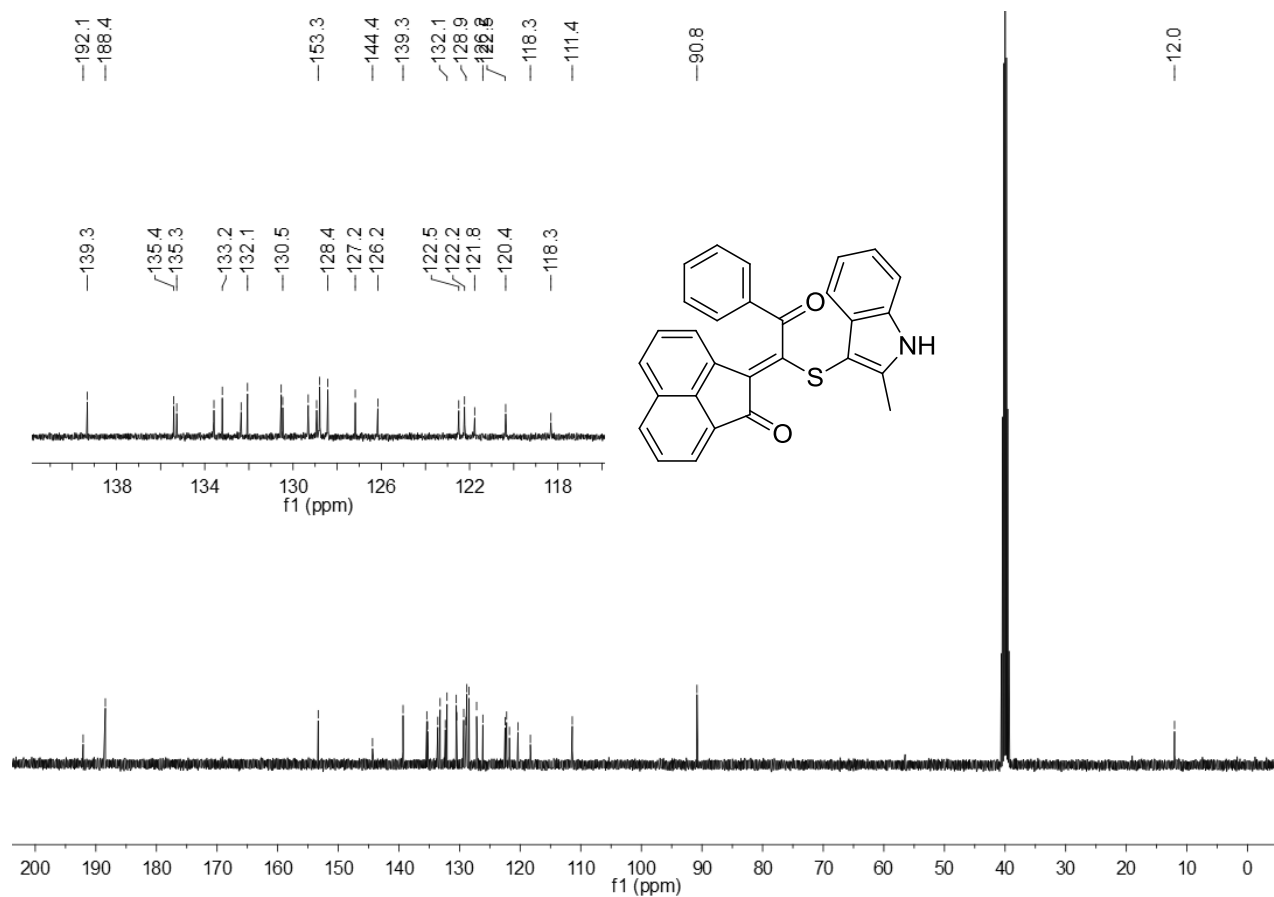



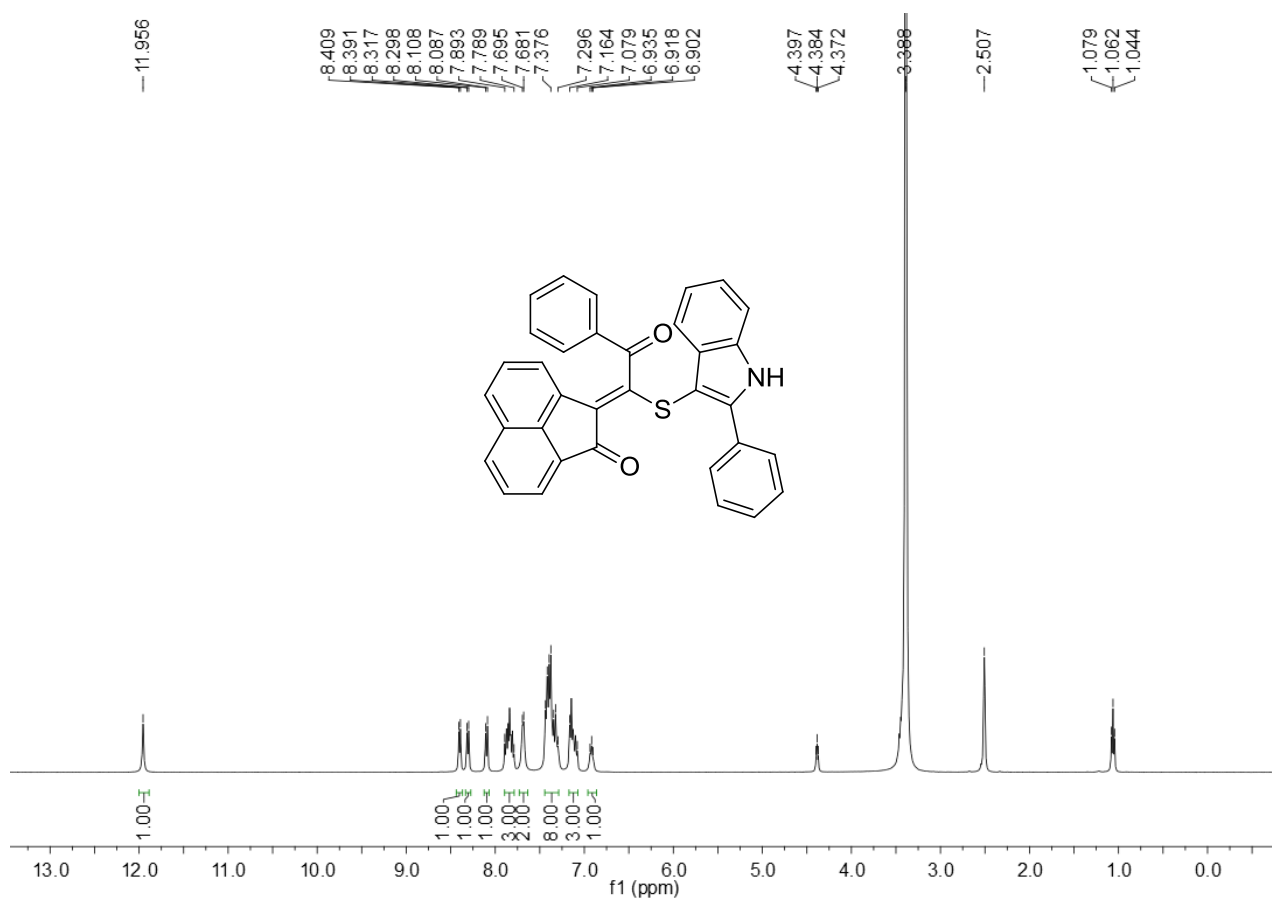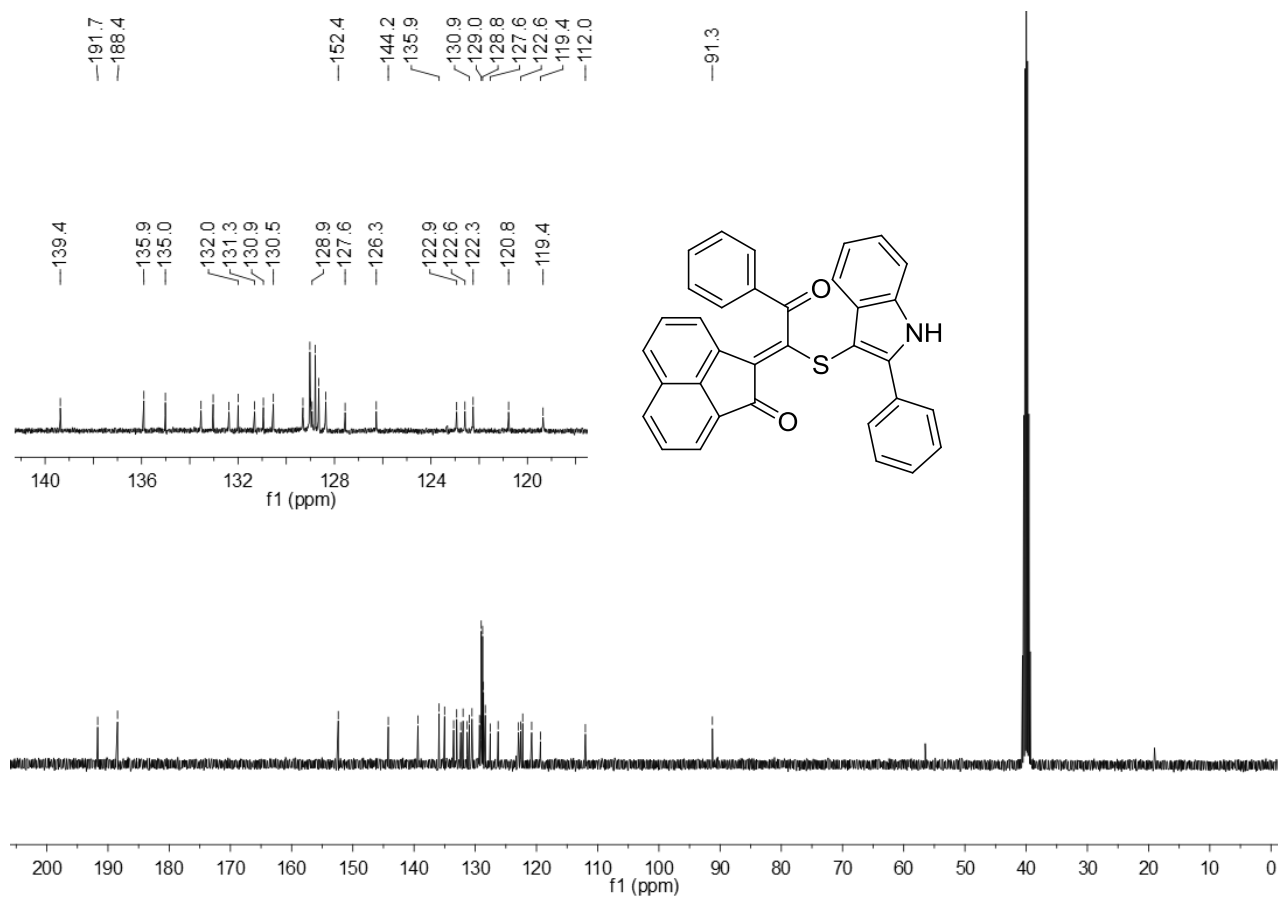

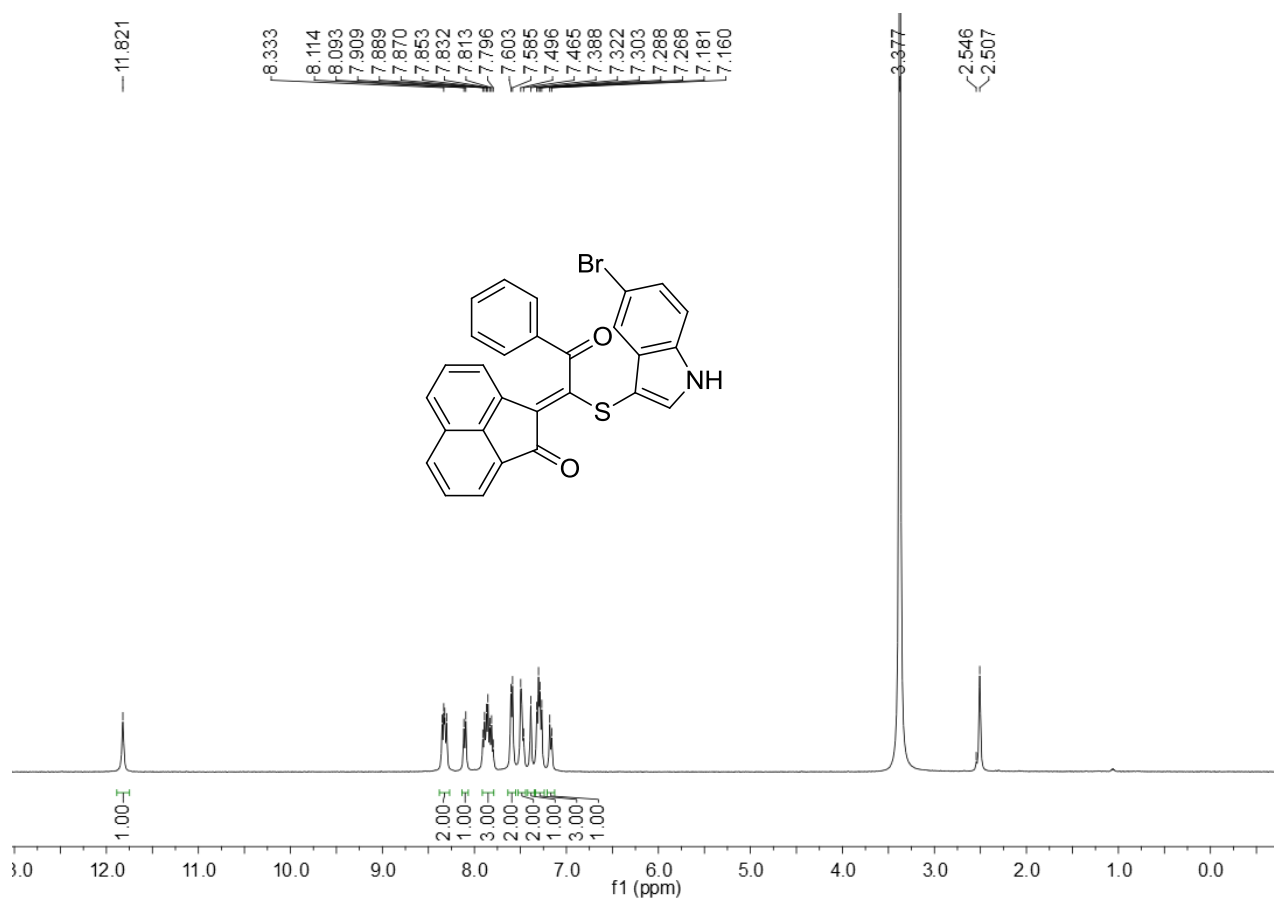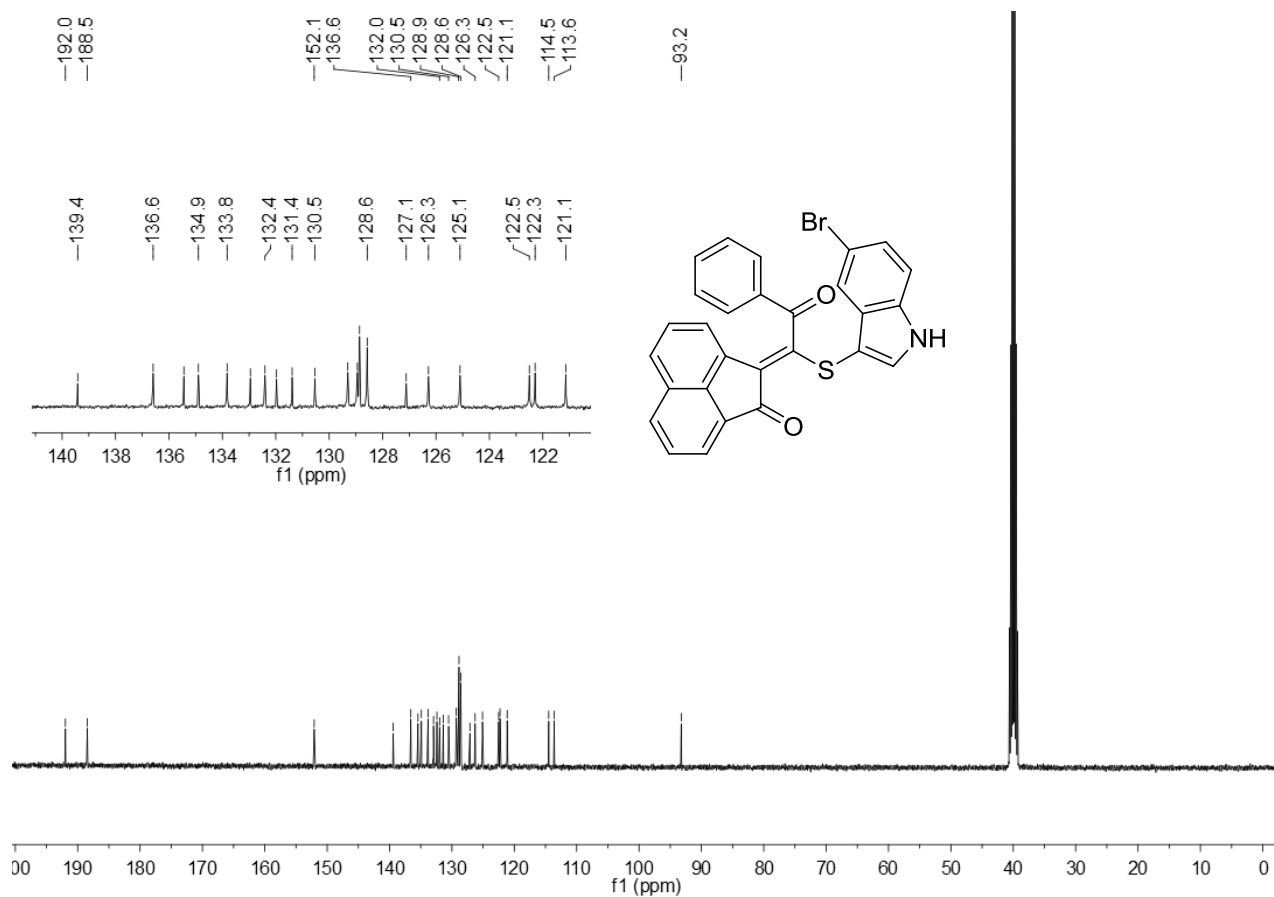

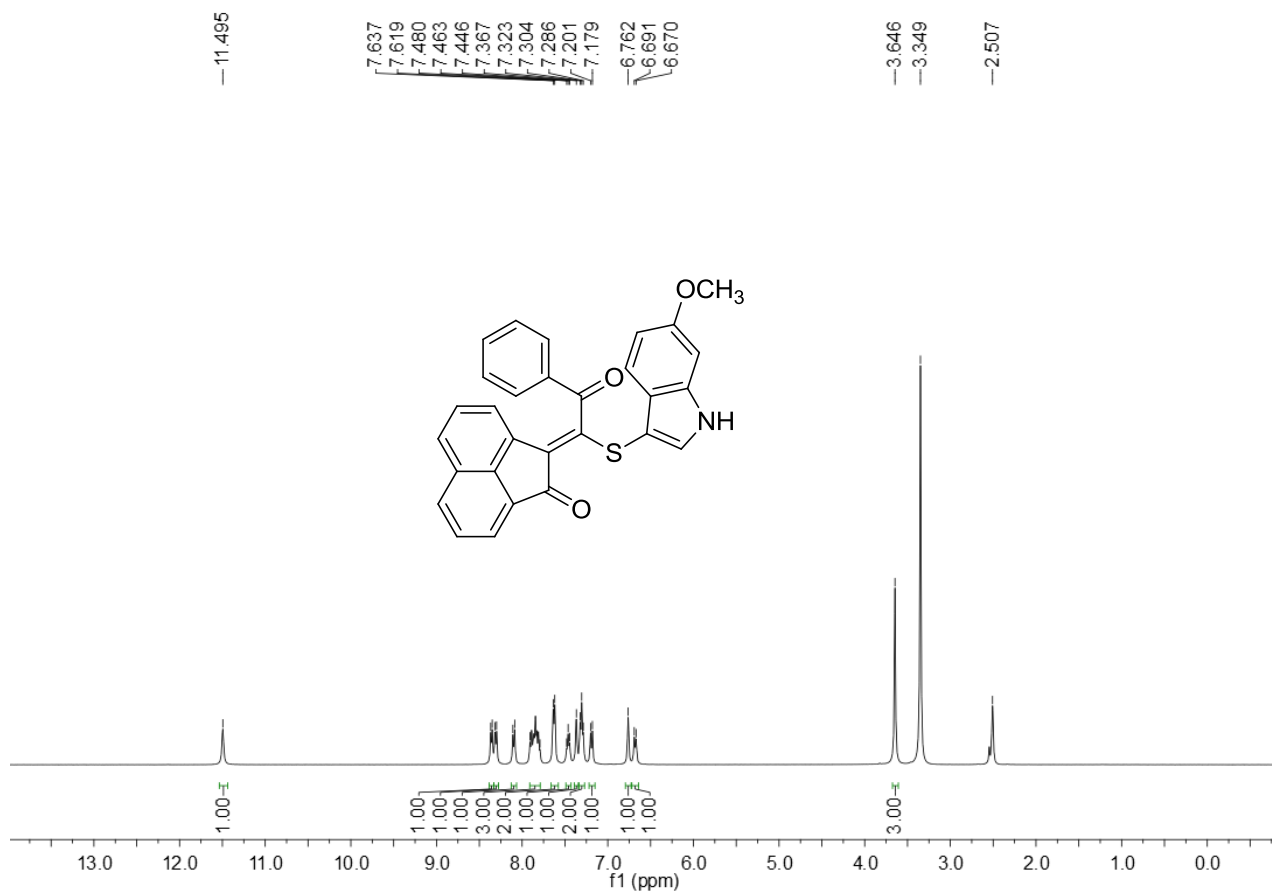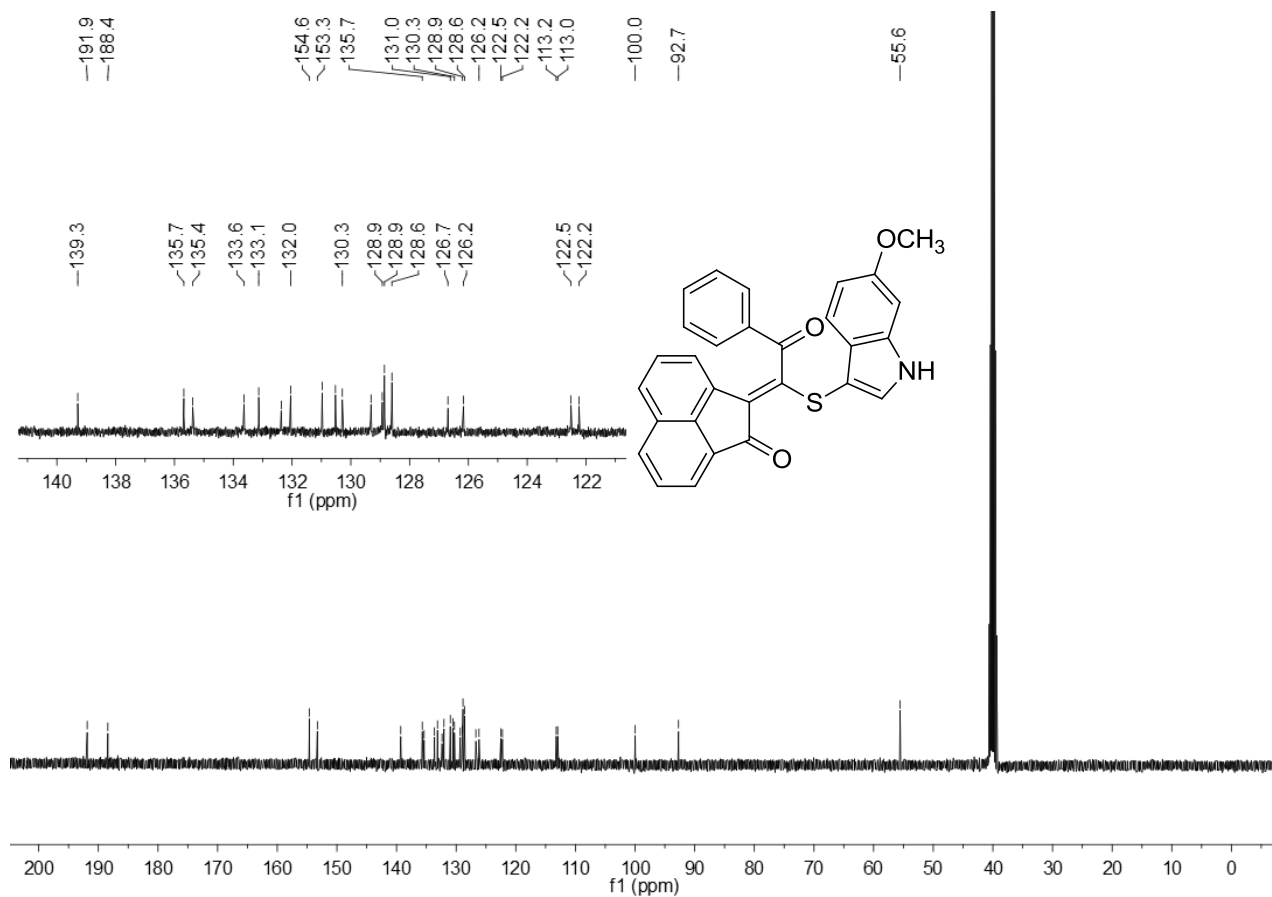

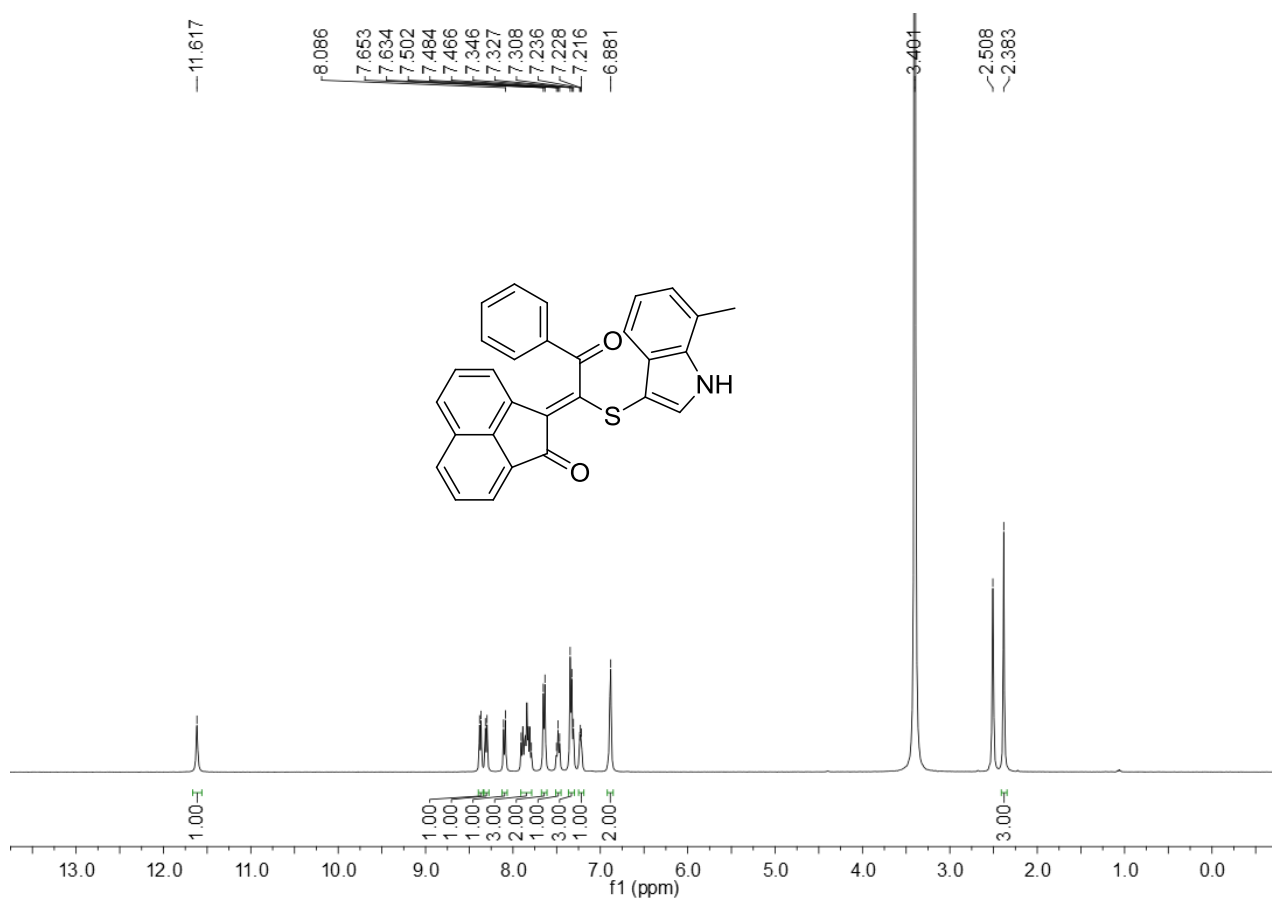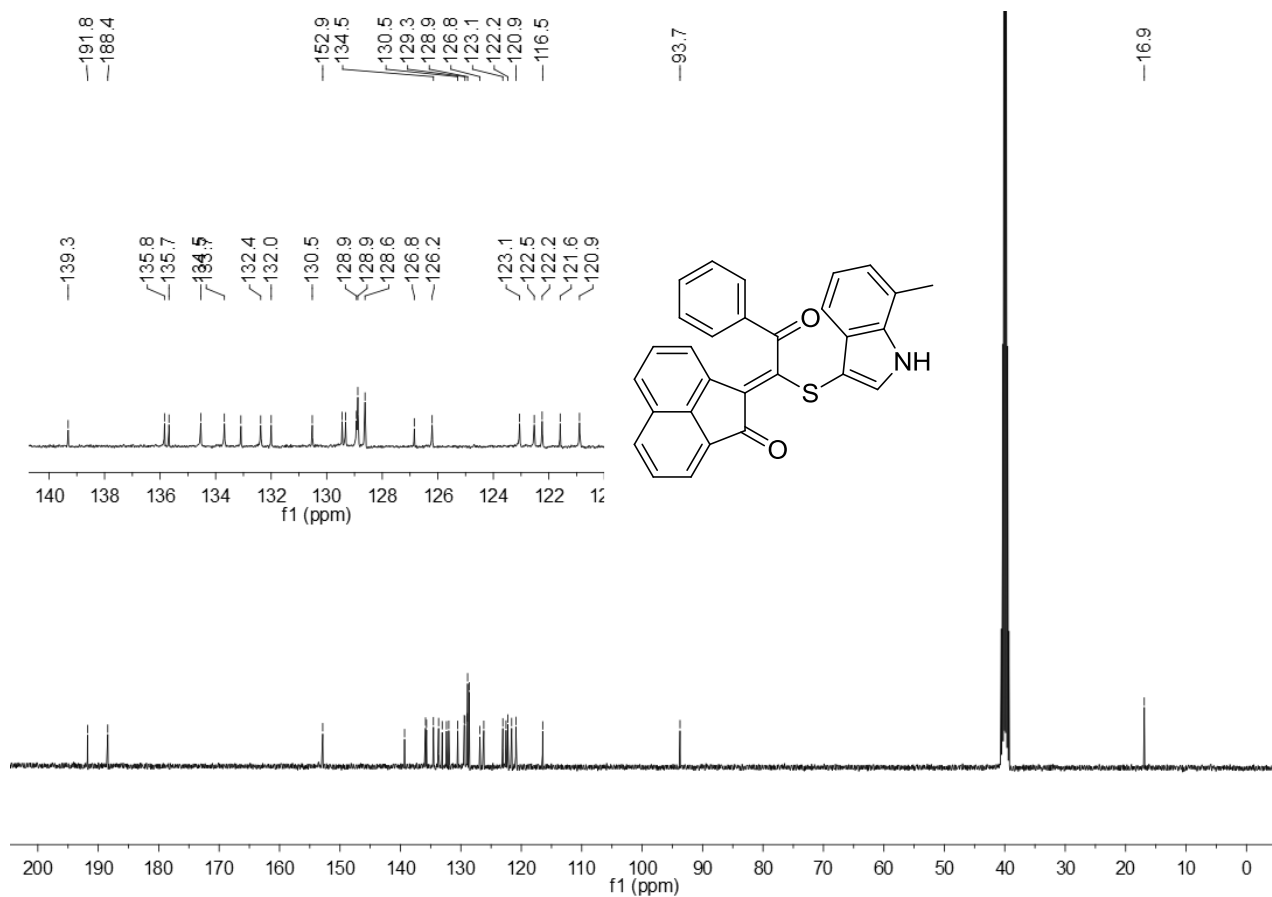

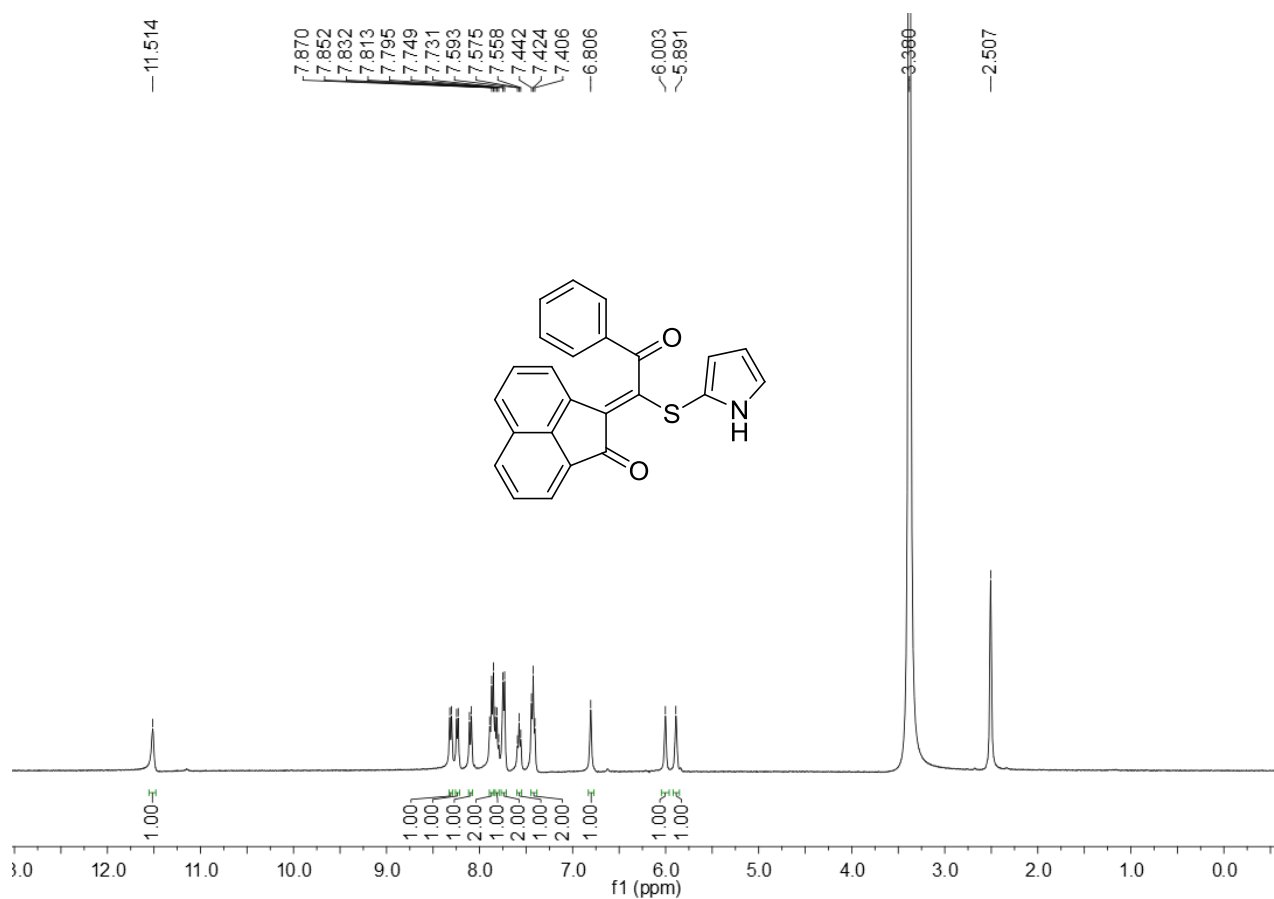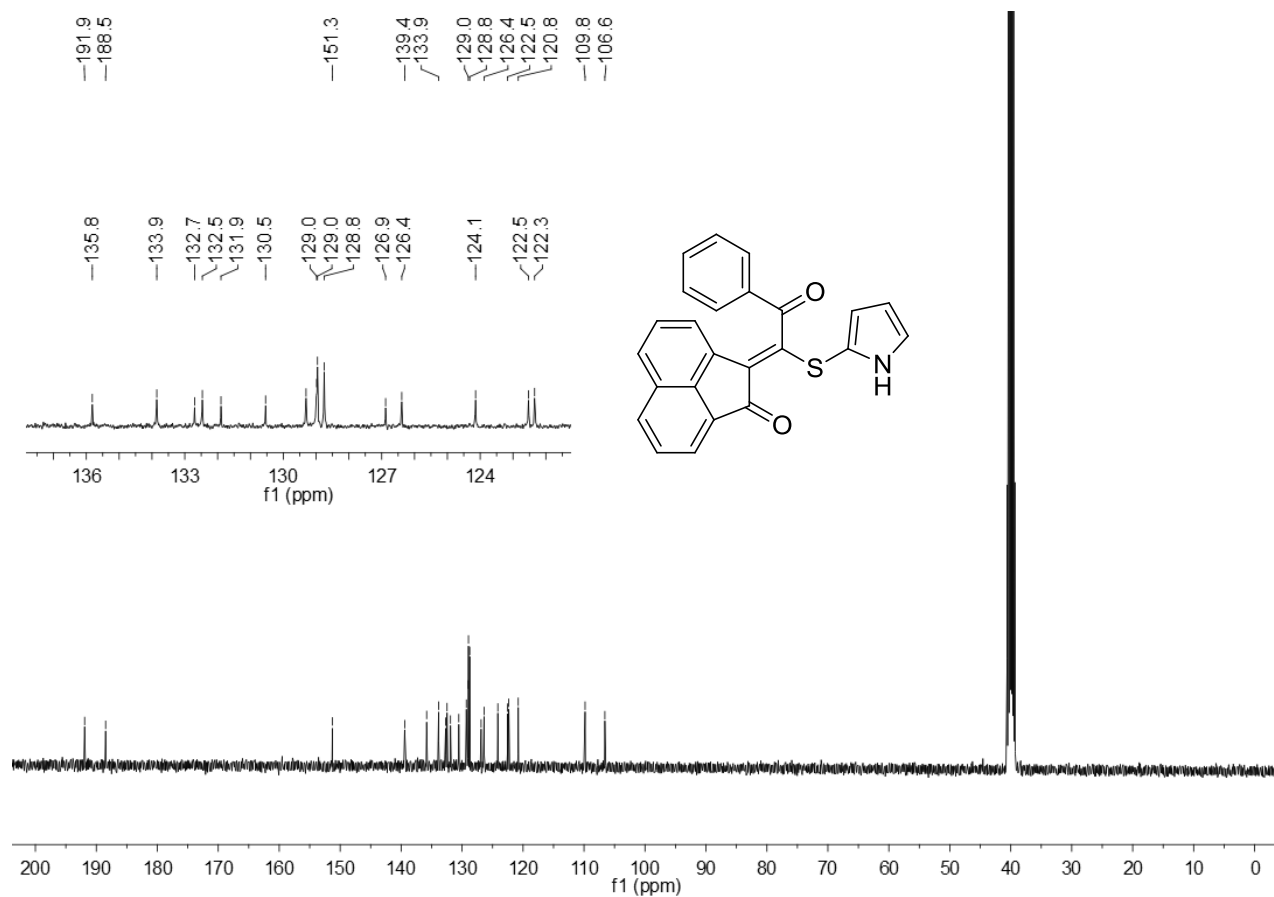

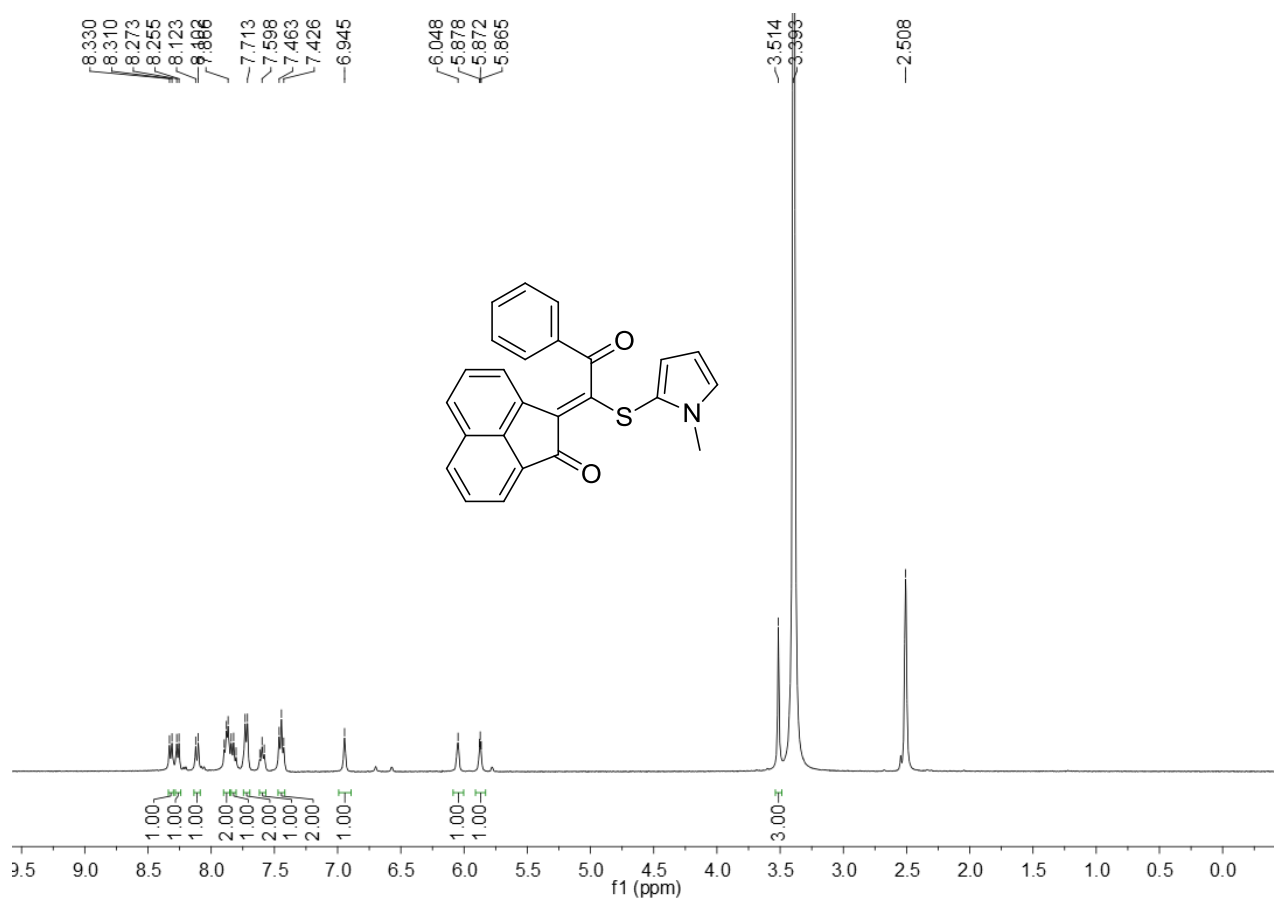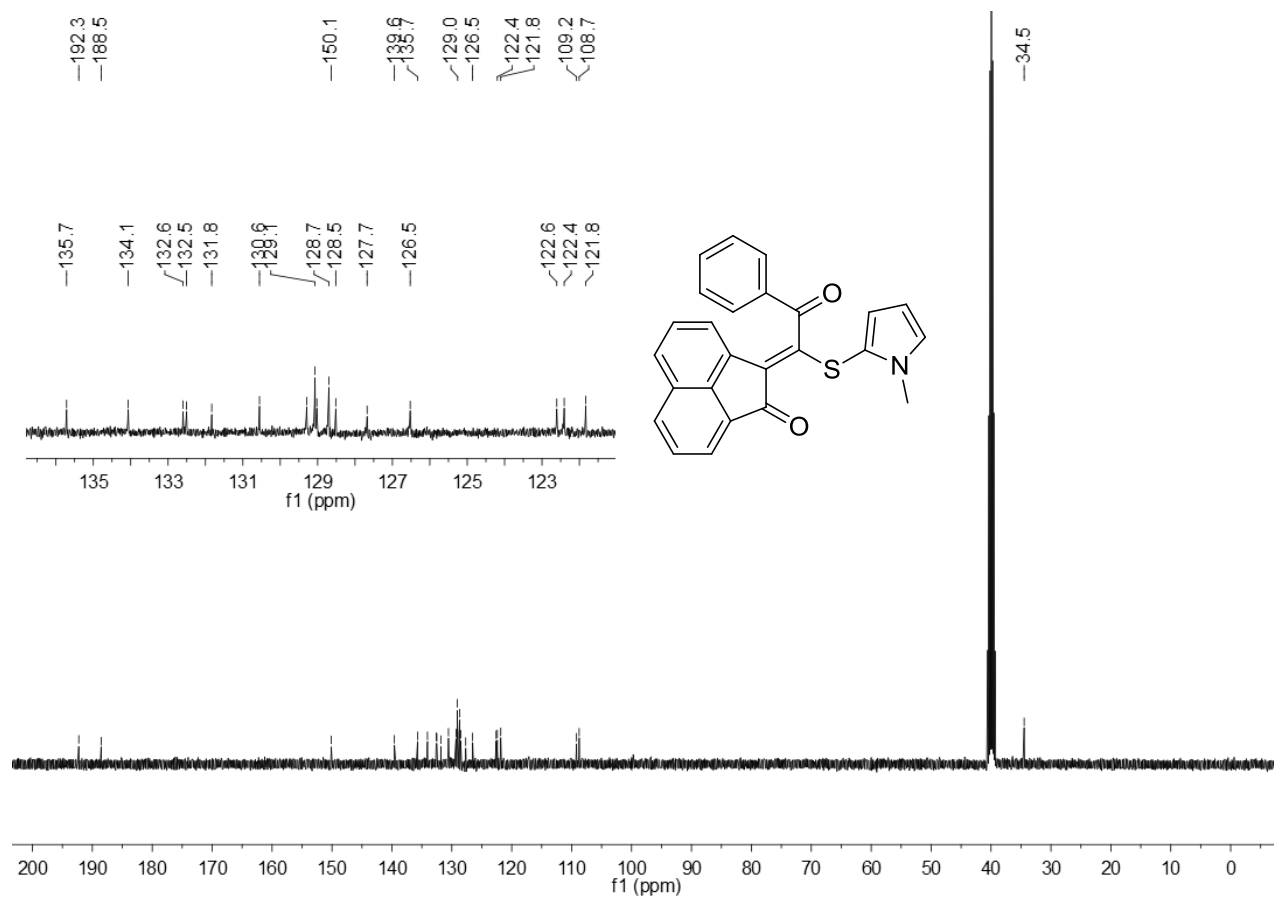

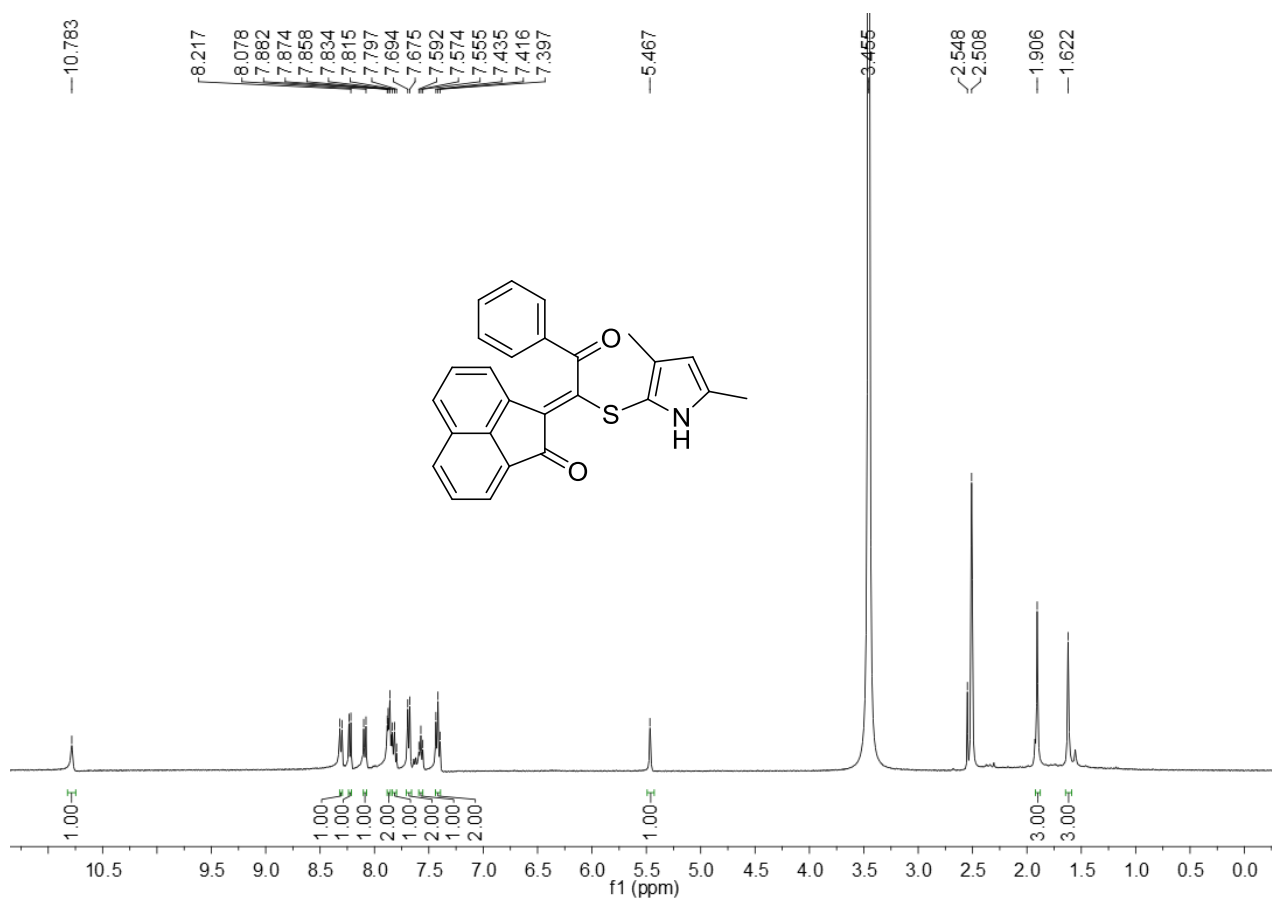

**<sup>1</sup>H NMR Spectrum of Compound 7j**

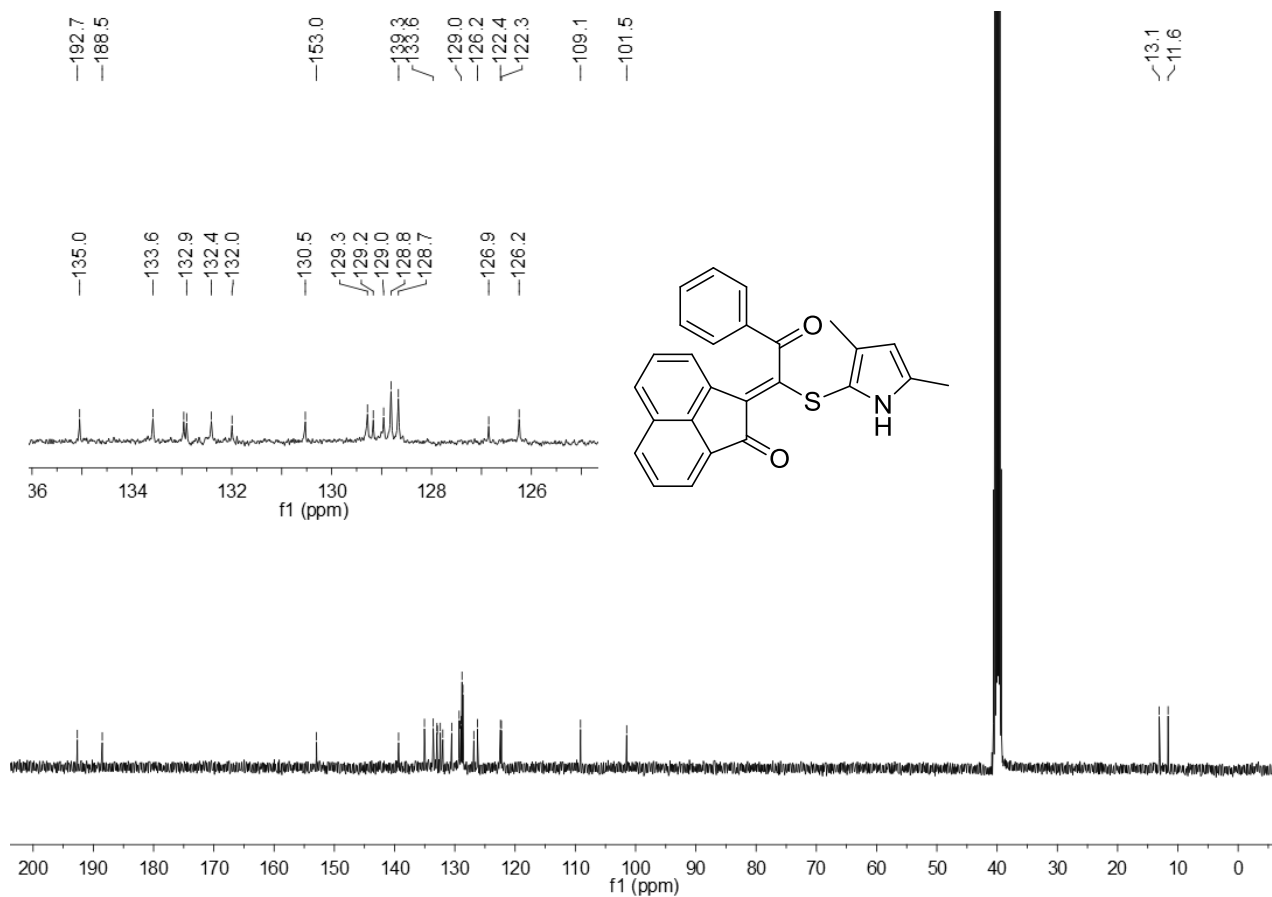

**<sup>13</sup>C NMR Spectrum of Compound 7j**





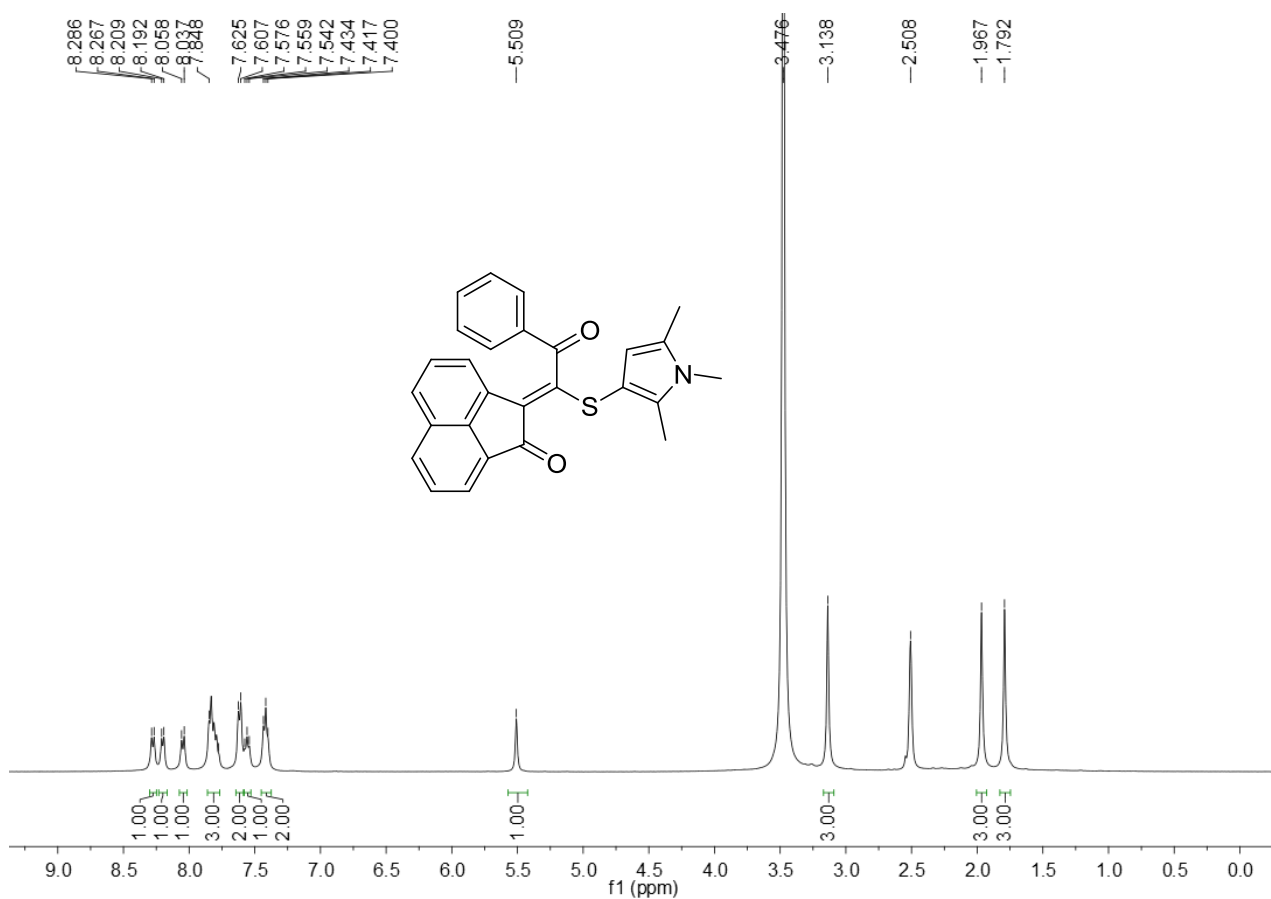

**<sup>1</sup>H NMR Spectrum of Compound 7l**

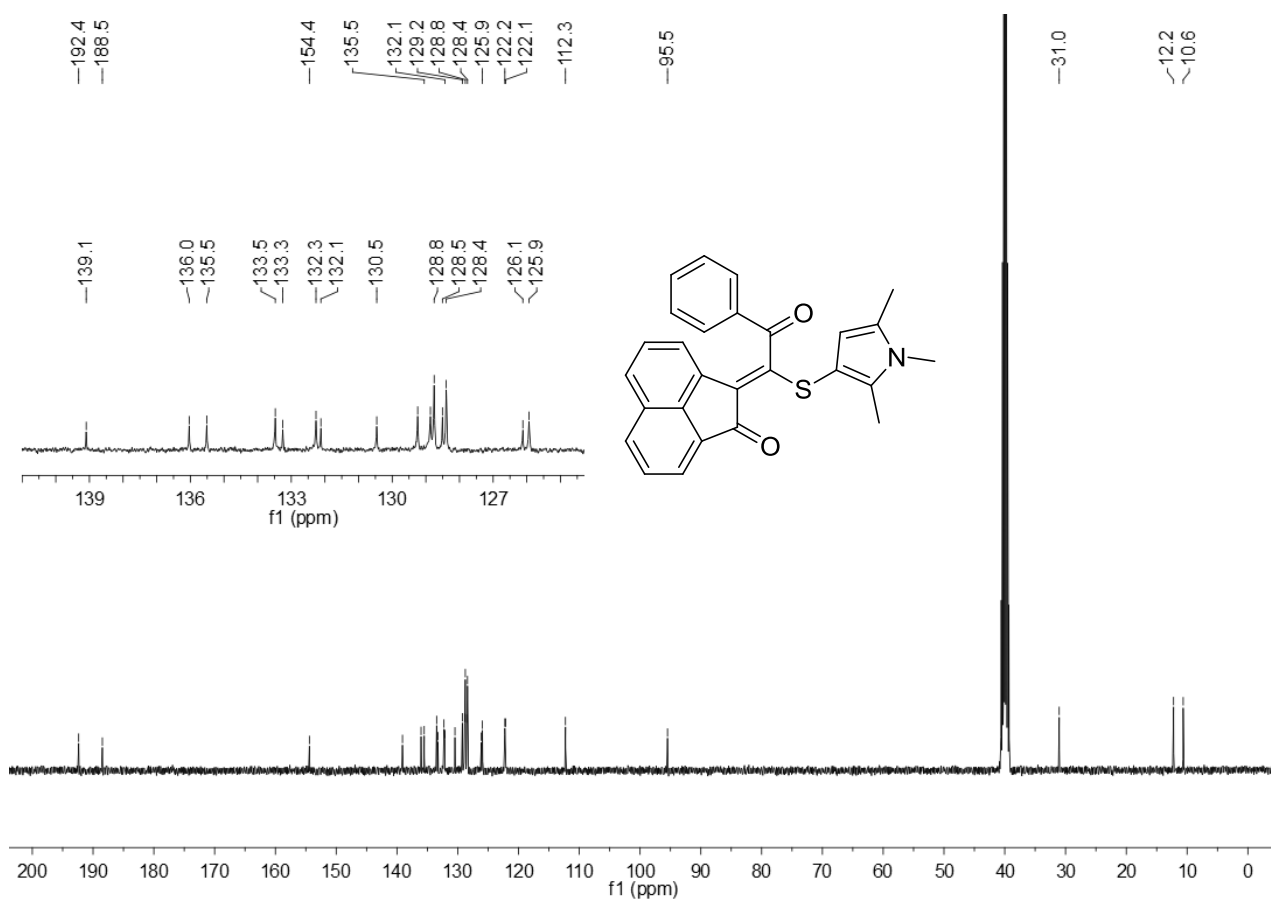

**<sup>13</sup>C NMR Spectrum of Compound 7l**

# Copies of $^1\text{H}$ NMR and $^{13}\text{C}$ NMR of Compounds 8a

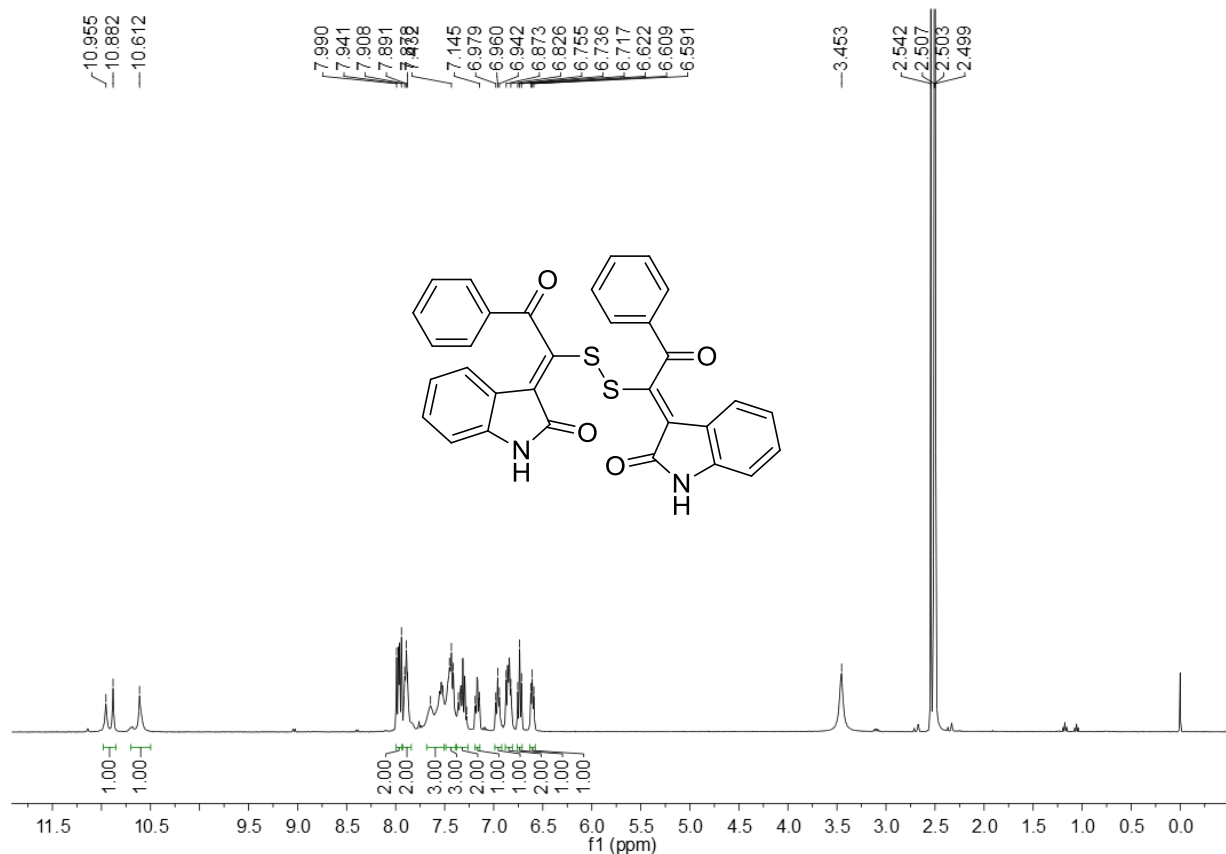

$^1\text{H}$  NMR Spectrum of Compound 8a

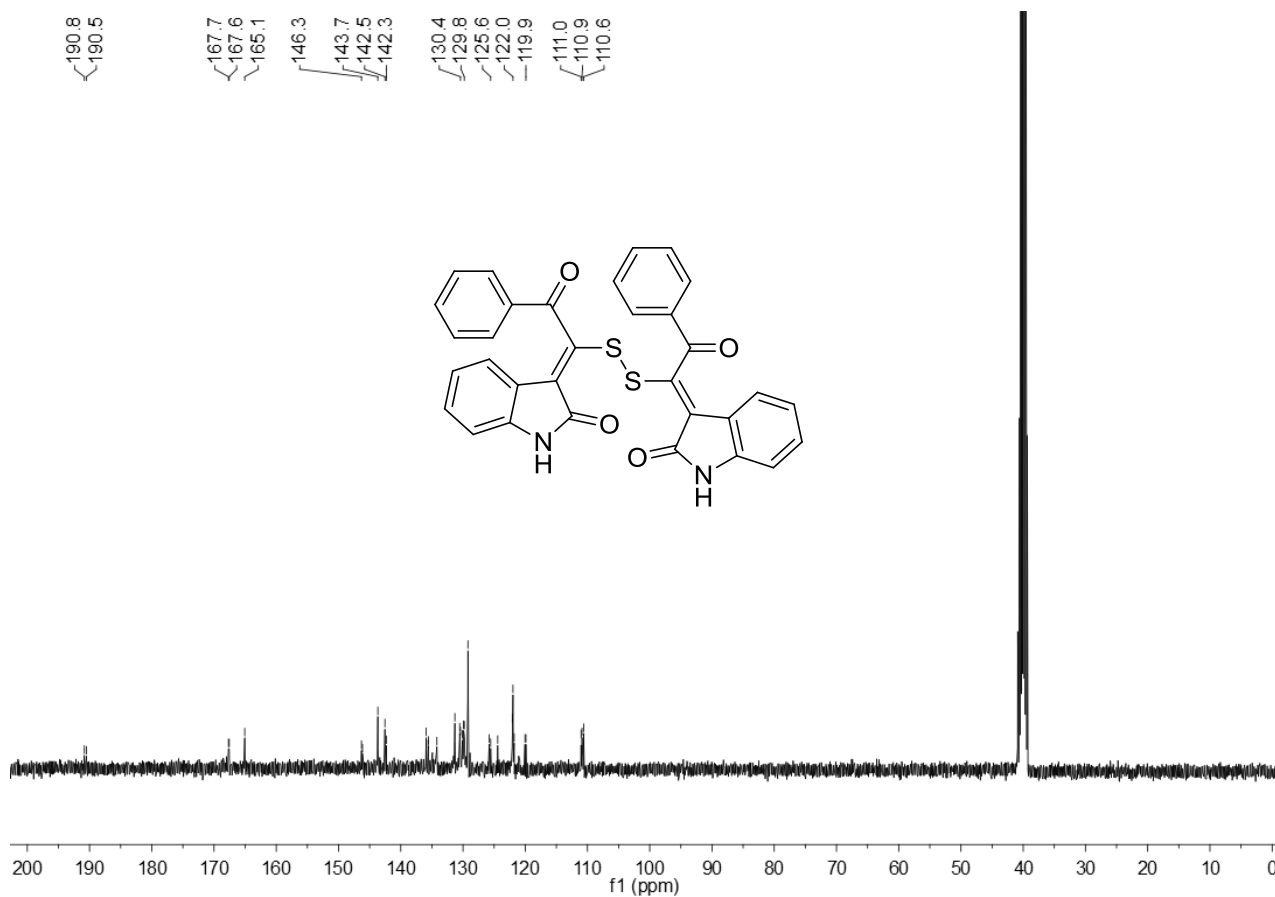

$^{13}\text{C}$  NMR Spectrum of Compound 8a
